# Supplementary material
Source: publisher figshare collection journal article supplement (https://acs.figshare.com/ndownloader/files/4633624)

# SUPPORTING INFORMATION

## Table of contents

|                                             |         |
|---------------------------------------------|---------|
| - Publication title                         | S2      |
| - General methods                           | S3-S4   |
| - $^1\text{H}$ and $^{13}\text{C}$ NMR data | S5-S91  |
| Compound 5                                  | S5-S6   |
| Compound 7                                  | S7-S8   |
| Compound 8                                  | S9-S10  |
| Compound 10                                 | S11-S12 |
| Compound 11                                 | S13-S14 |
| Compound 12                                 | S15-S16 |
| Compound 13                                 | S17-S18 |
| Compound 14                                 | S19-S20 |
| Compound 15                                 | S21-S22 |
| Compound 16                                 | S23-S24 |
| Compound 17                                 | S25-S26 |
| Compound 18                                 | S27-S28 |
| Compound 19                                 | S29-S30 |
| Compound 20                                 | S31-S32 |
| Compound 21                                 | S33-S34 |
| Compound 22                                 | S35-S36 |
| Compound 23                                 | S37-S38 |
| Compound 24                                 | S39-S40 |
| Compound 25                                 | S41-S42 |
| Compound 26                                 | S43-S44 |
| Compound 27                                 | S45-S46 |
| Compound 28                                 | S47-S48 |
| Compound 29                                 | S49-S50 |
| Compound 30                                 | S51-S52 |
| Compound 31                                 | S53-S54 |
| Compound 32                                 | S55-S56 |
| Compound 33                                 | S57-S58 |
| Compound 34                                 | S59-S60 |
| Compound 35                                 | S61-S62 |
| Compound 36                                 | S63-S64 |
| Compound 37                                 | S65-S66 |
| Compound 38                                 | S67-S68 |
| Compound 39                                 | S69-S70 |
| Compound 40                                 | S71-S72 |
| Compound 41                                 | S73-S74 |
| Compound 42                                 | S75-S76 |
| Compound 44                                 | S77-S78 |
| Compound 45                                 | S79-S80 |
| Compound 46                                 | S81-S82 |
| Compound 47                                 | S83-S84 |
| Compound 48                                 | S85-S86 |
| Compound 49                                 | S87-S88 |
| Compound 50                                 | S89-S90 |
| Compound 48bis                              | S91     |

Rapid access to amino-substituted quinoline,  
(di)benzofuran and carbazole heterocycles through  
an aminobenzannulation reaction.

*Martin Tiano, Philippe Belmont\**

Institut de Chimie et Biochimie Moléculaires et Supramoléculaires (ICBMS), Laboratoire de Synthèse et Méthodologie Organiques (LSMO) - Université de Lyon, Université Claude Bernard, Lyon I - UMR CNRS 5246, Bâtiment CPE - 43 boulevard du 11 Novembre 1918 - 69622 Villeurbanne cedex, France.

[philippe.belmont@univ-lyon1.fr](mailto:philippe.belmont@univ-lyon1.fr)

## General methods:

### General procedure for Sonogashira coupling:

CuI (2.5 mol %), PdCl<sub>2</sub>(PPh<sub>3</sub>)<sub>2</sub> (5 mol %), the appropriate aryl-halide (1 mmol), were suspended in anhydrous DMF (1 mL per mmol) and Et<sub>3</sub>N (0.6 mL per mmol) under argon. Then was added the appropriate acetylene (1.2 equiv.) was added. The mixture was stirred overnight at room temperature and then the slurry was diluted in EtOAc. Filtration on celite, evaporation of Et<sub>3</sub>N, DMF and EtOAc under reduced pressure and purification by flash chromatography on silica gel (using cyclohexane/ EtOAc mixtures) afforded the desired product. [For the benzofuran series the reaction is performed in dimethylacetamide (DMA) instead of DMF].<sup>1</sup>

### General procedure for Grignard reaction:

The appropriate aldehyde (1 mmol) was diluted in dry THF (5.0 mL) under stirring and cooled at 0-5°C under argon and methylmagnesium bromide (3M in Et<sub>2</sub>O, 1.3 equiv) was added dropwise to the solution. After 1 hour the reaction was quenched by addition of a saturated solution of NH<sub>4</sub>Cl. Dilution in EtOAc and washing with water and brine afforded the desired methyl-alcohol, used without further purification.

### General procedure for oxidation reaction mediated by TPAP/NMO system:

The appropriate methyl-alcohol (1 mmol) was stirred with N-methylmorpholine oxide (2 mmol) in dry CH<sub>2</sub>Cl<sub>2</sub> (5 mL) under argon at 0°C. Tetrapropylammonium perruthenate (0.05 mmol) was added. After 20 min, the reaction media was filtered through silica gel eluting with EtOAc. Evaporation of solvents under reduced pressure and purification by flash chromatography on silica gel (using cyclohexane/EtOAc mixtures) afforded the desired methyl ketone.

---

<sup>1</sup> In this case dimethylacetamide (DMA) was used instead of DMF to avoid partial reduction of the triple-bond.

General procedures for aminobenzannulation reaction:

- Method A: To a solution of starting material (1 mmol) in dry dichloromethane (5 mL) under argon was added successively activated molecular sieves (4 Å, pulver < 5µ, 6 weight equiv.) and amine (3 equiv.). The mixture was stirred overnight at room temperature. Filtration through celite, evaporation of solvent and purification by flash chromatography on silica gel (using cyclohexane/EtOAc mixtures) afforded the desired products.
- Method B: To a solution of starting material (1 mmol) in dry dichloroethane (5 mL) under argon was added successively activated molecular sieves (4 Å, pulver < 5µ, 6 weight equiv.) and amine (3-6 equiv.). The mixture was stirred at reflux until completion (3 hours-2 days). Filtration through celite, evaporation of solvent and purification by flash chromatography on silica gel (using cyclohexane/EtOAc mixtures) afforded the desired products.
- Method C: starting material (1 mmol) was stirred in the appropriate amine (5 mL), with molecular sieves (4 Å, pulver < 5µ, 6 weight equiv.) at reflux until completion. Filtration through celite, dilution in EtOAc, washing evaporation of solvent and purification by flash chromatography on silica gel (using cyclohexane/EtOAc mixtures) afforded the desired products.

Procedure for removal of palladium residue:<sup>2</sup>

Compound **19** (26 mg, 0.074 mmol) was re-crystallized in cyclohexane and hot filtration allowed removal of some small red particles. Then, the resulting white powder was stirred with 500 mg of tris(2-aminoethyl)amine polystyrene in toluene during 48 hours and filtrated through celite. The residue was then submitted to the aminobenzannulation reaction (method **B**) with a new glassware and stir bar in 1 mL of DCE with 100 mg of 4Å powdered molecular sieves and pyrrolidine (25 µL). After purification, this reaction afforded 25 mg (0.062 mmol) of the desired product **48bis** with a yield of 84% (from **19**).

---

<sup>2</sup> Urawa, Y.; Miyazawa, M.; Ozeki, N.; Ogura, K. *Org. Process Res. Dev.* **2003**, 7, 191.

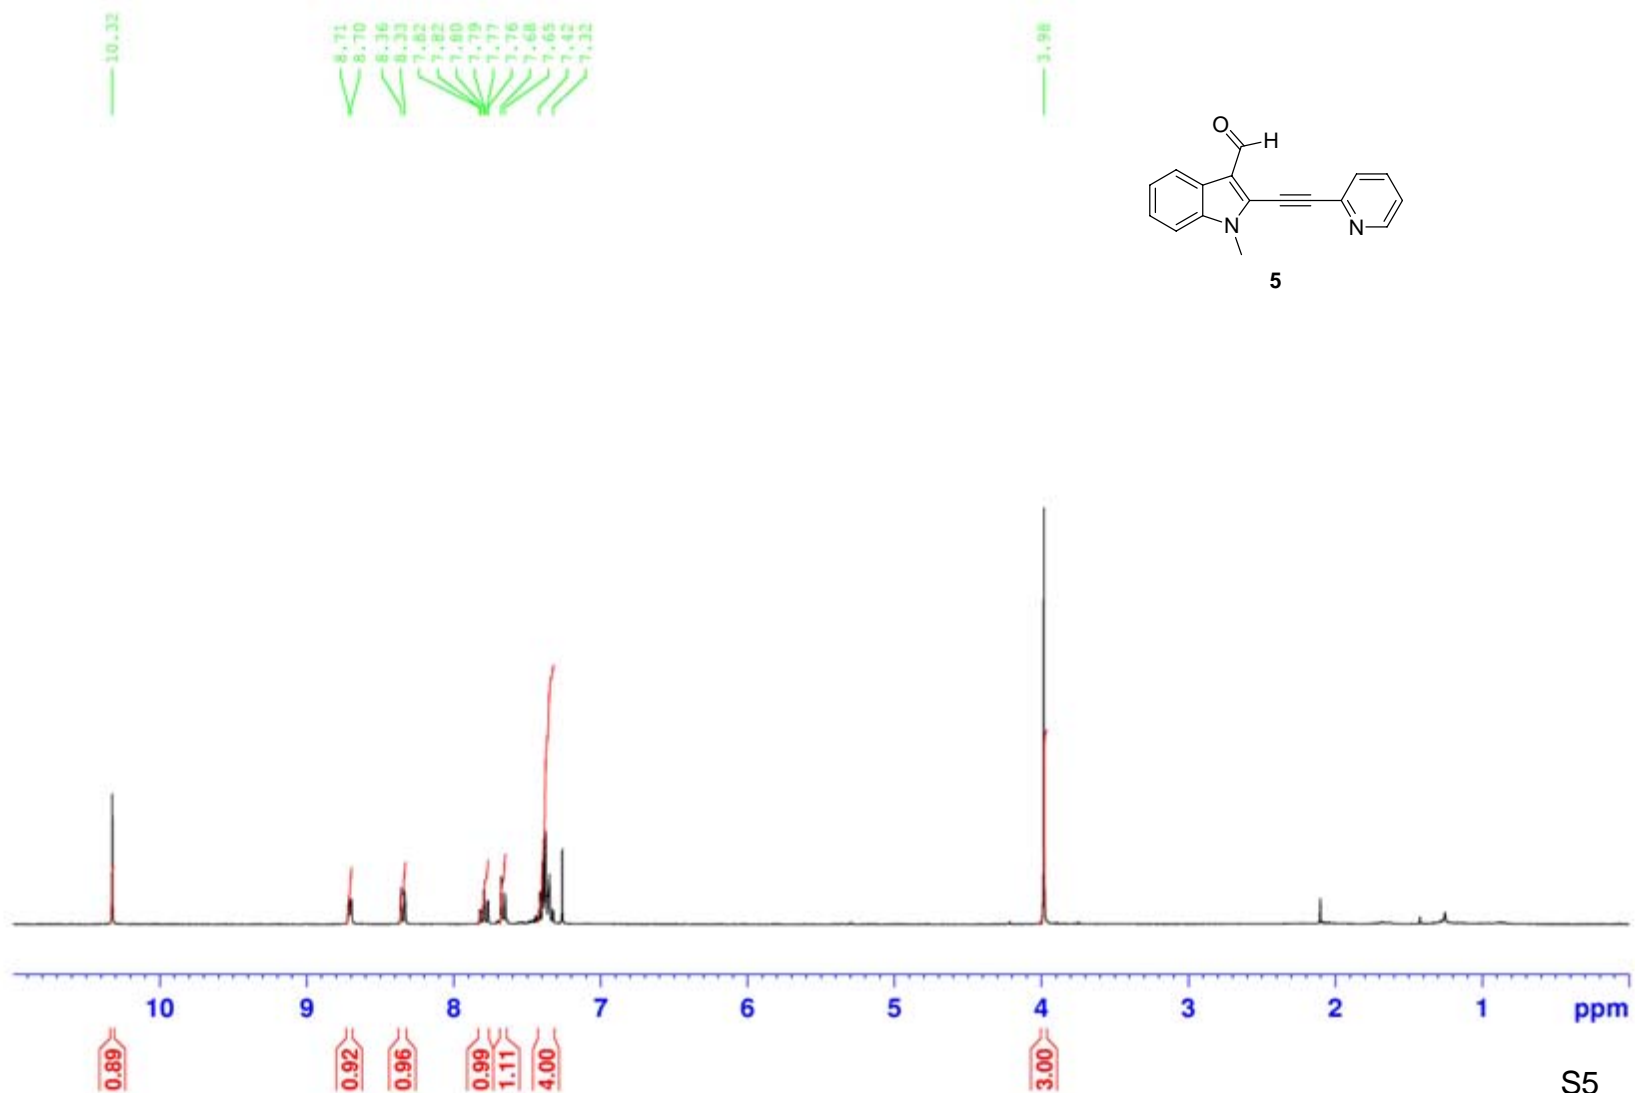

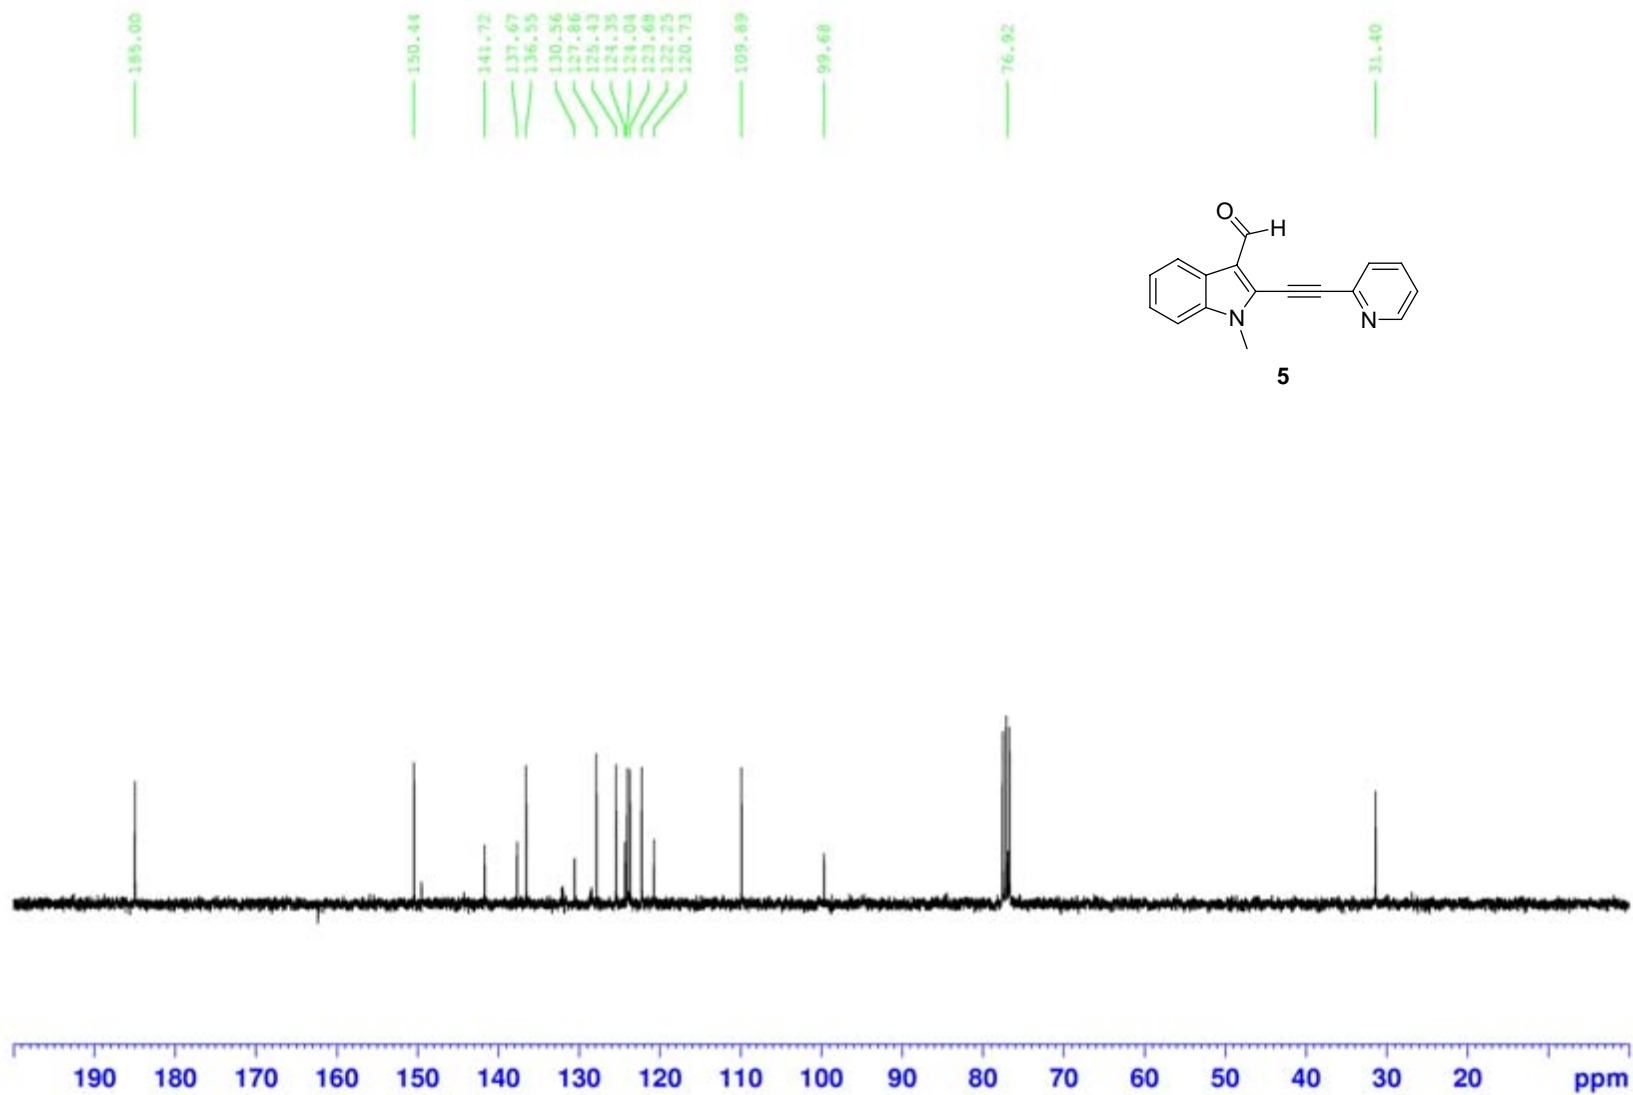

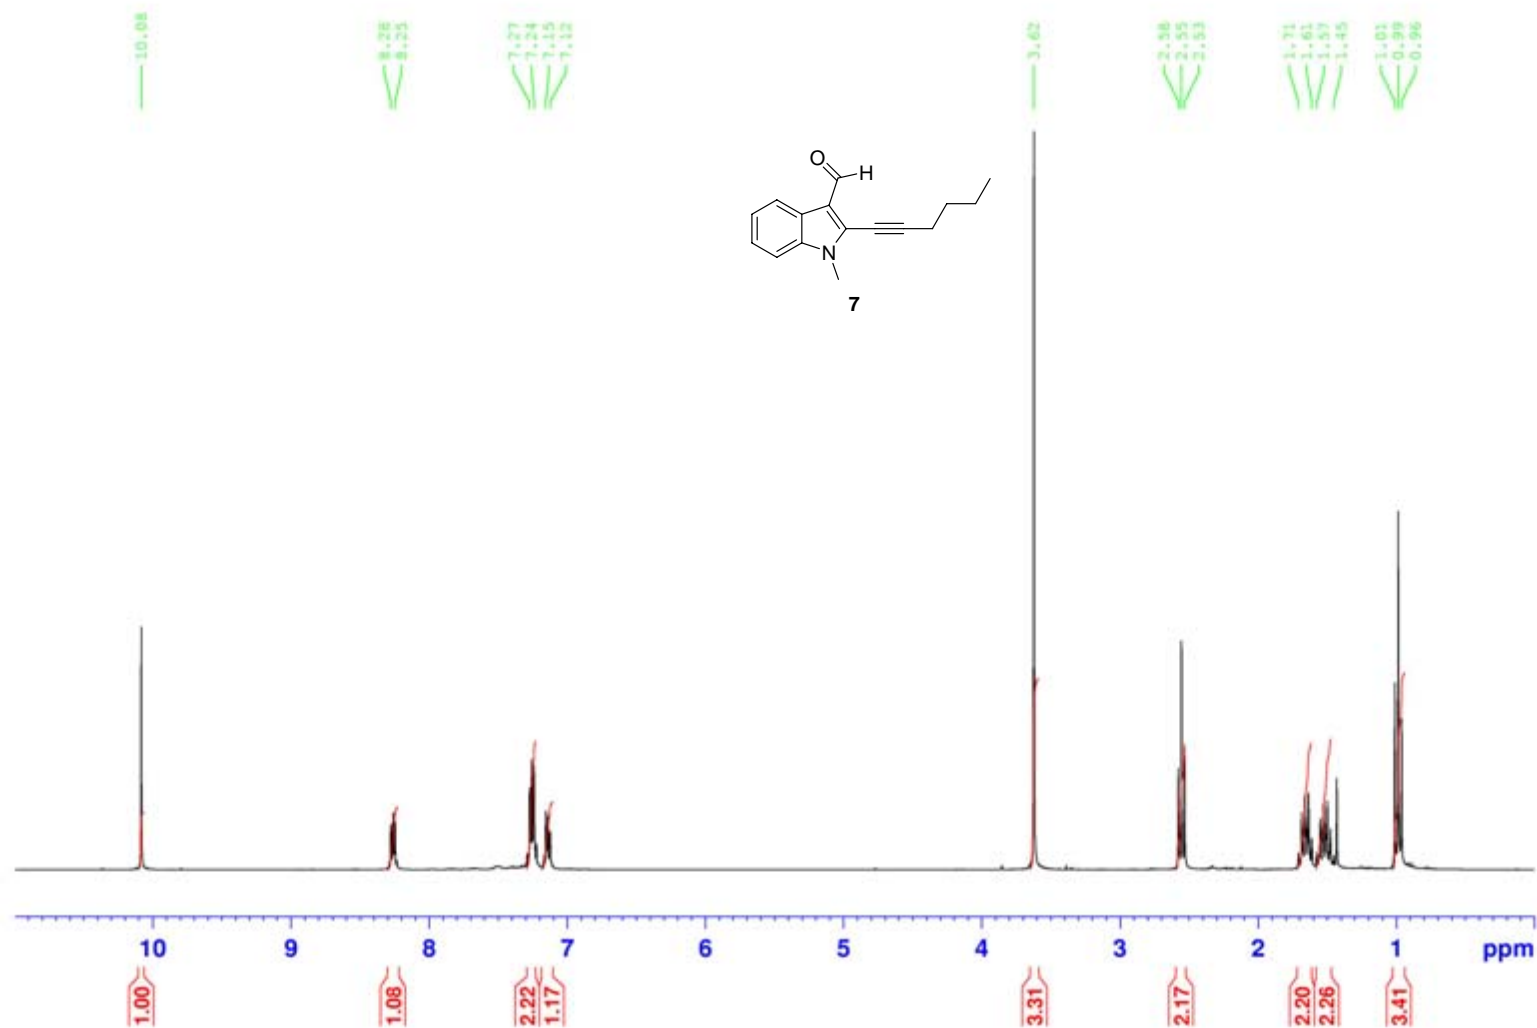

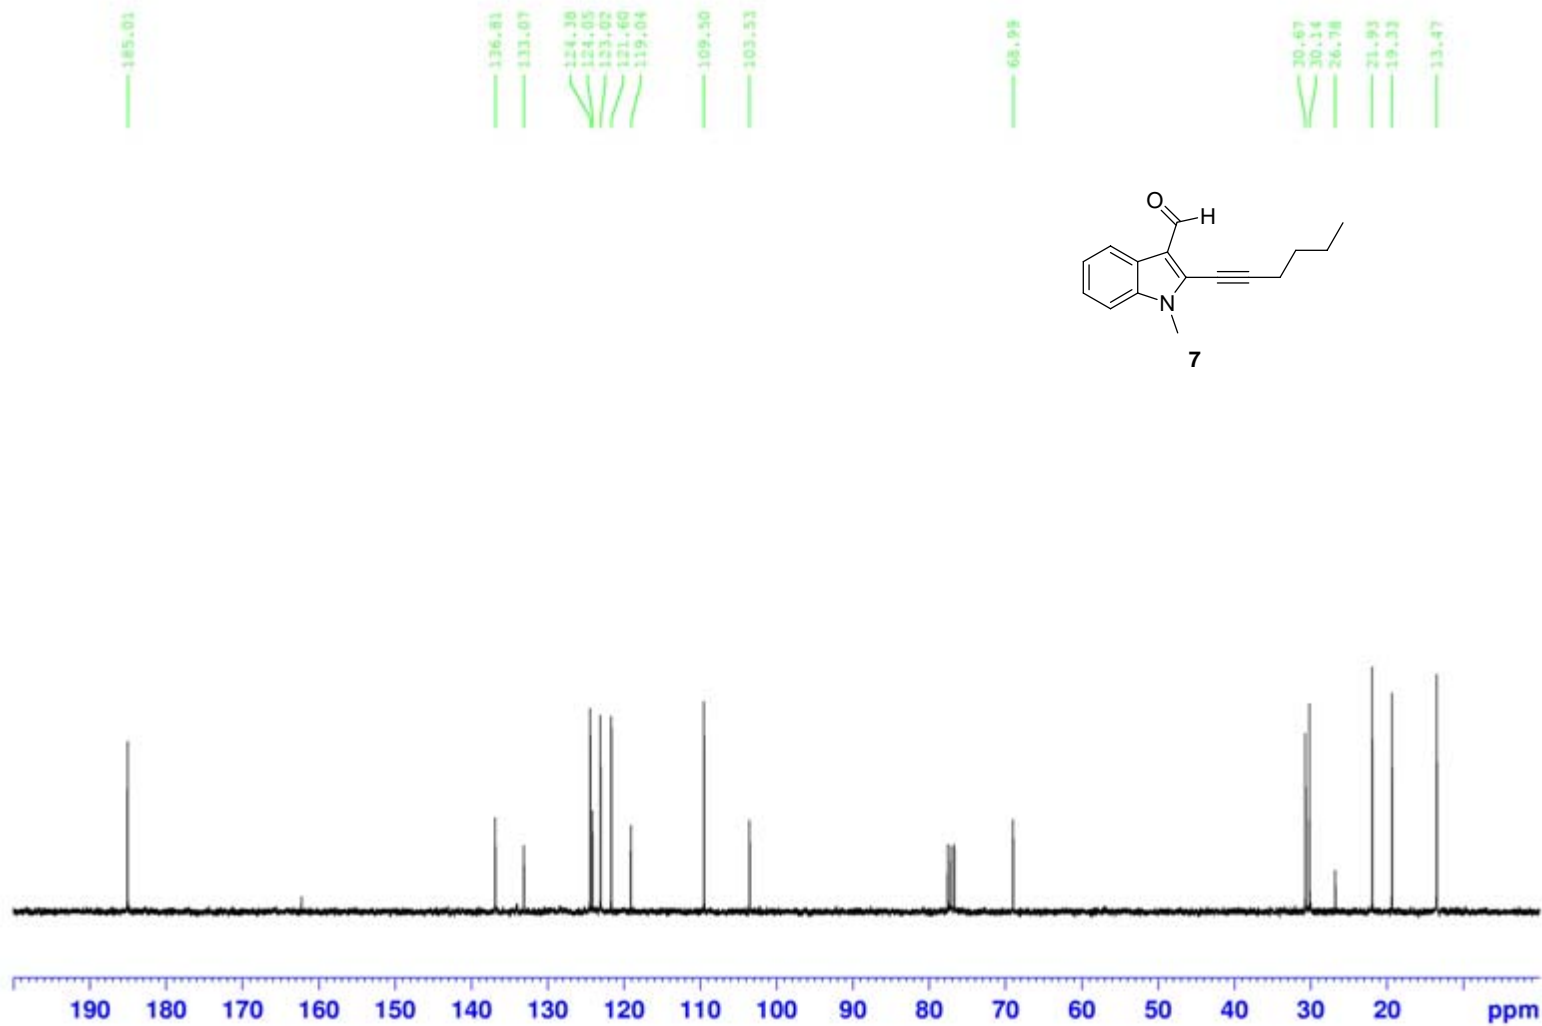



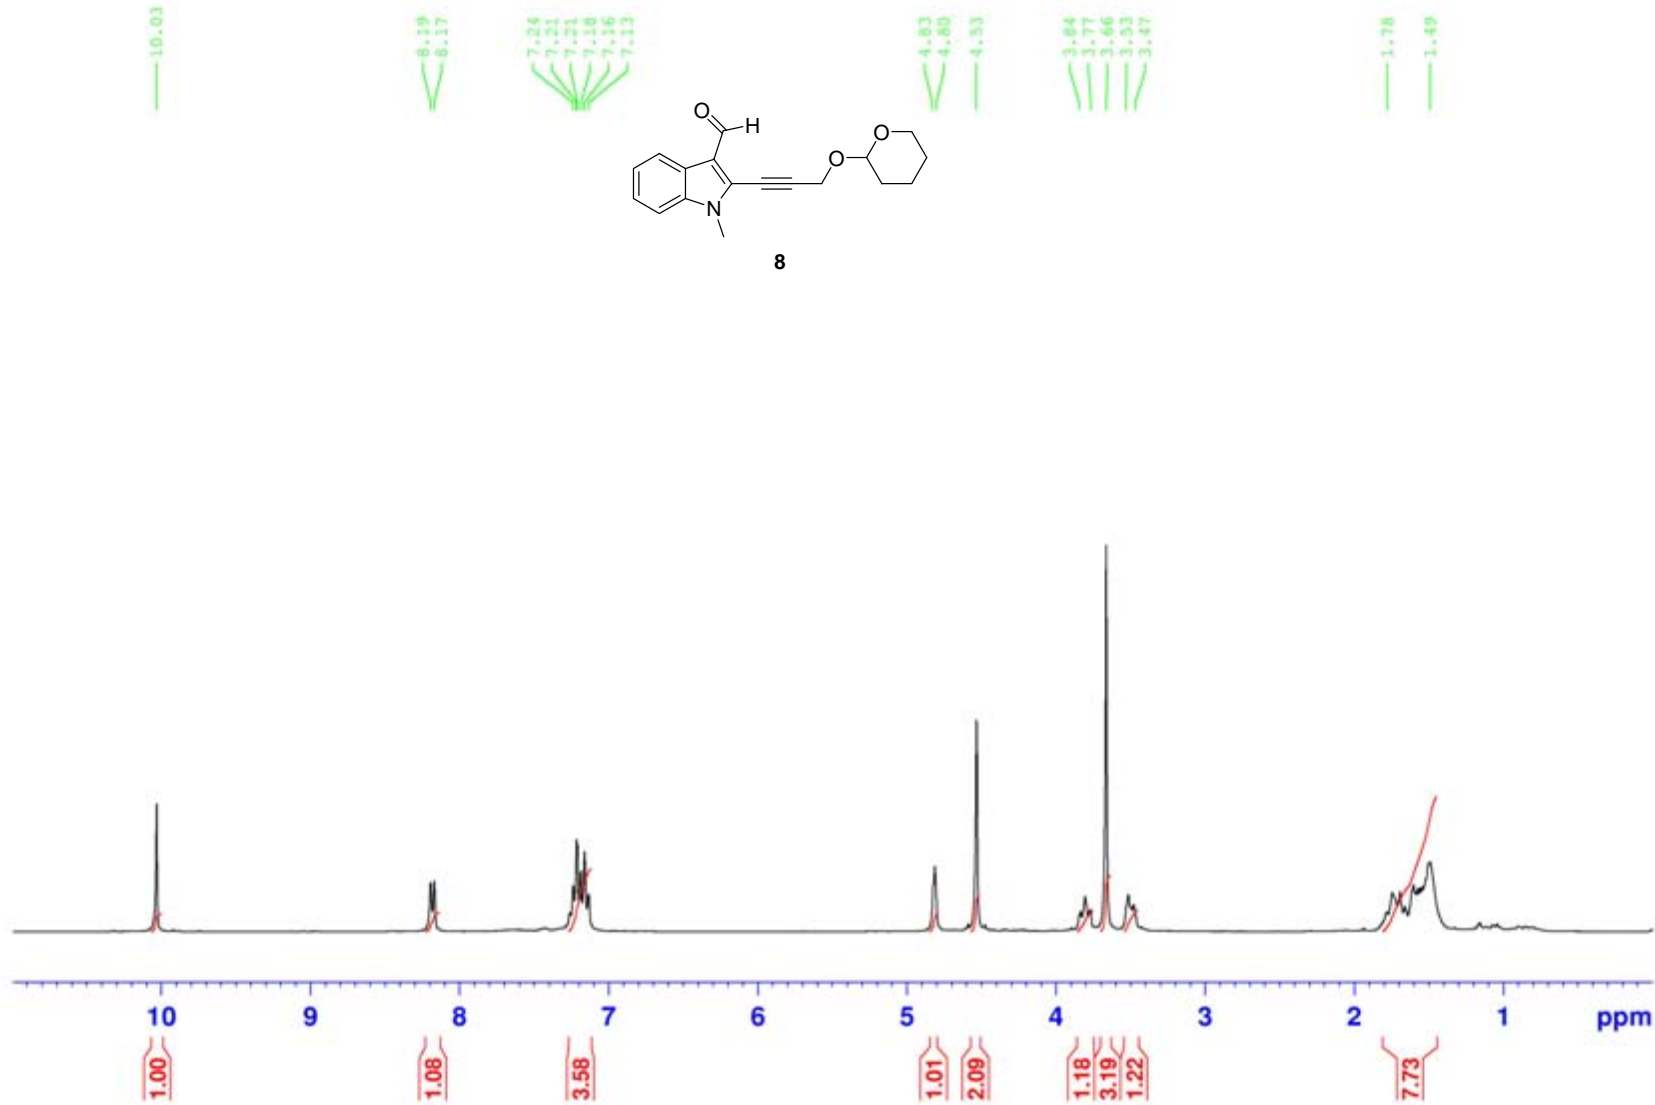

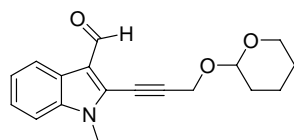

8

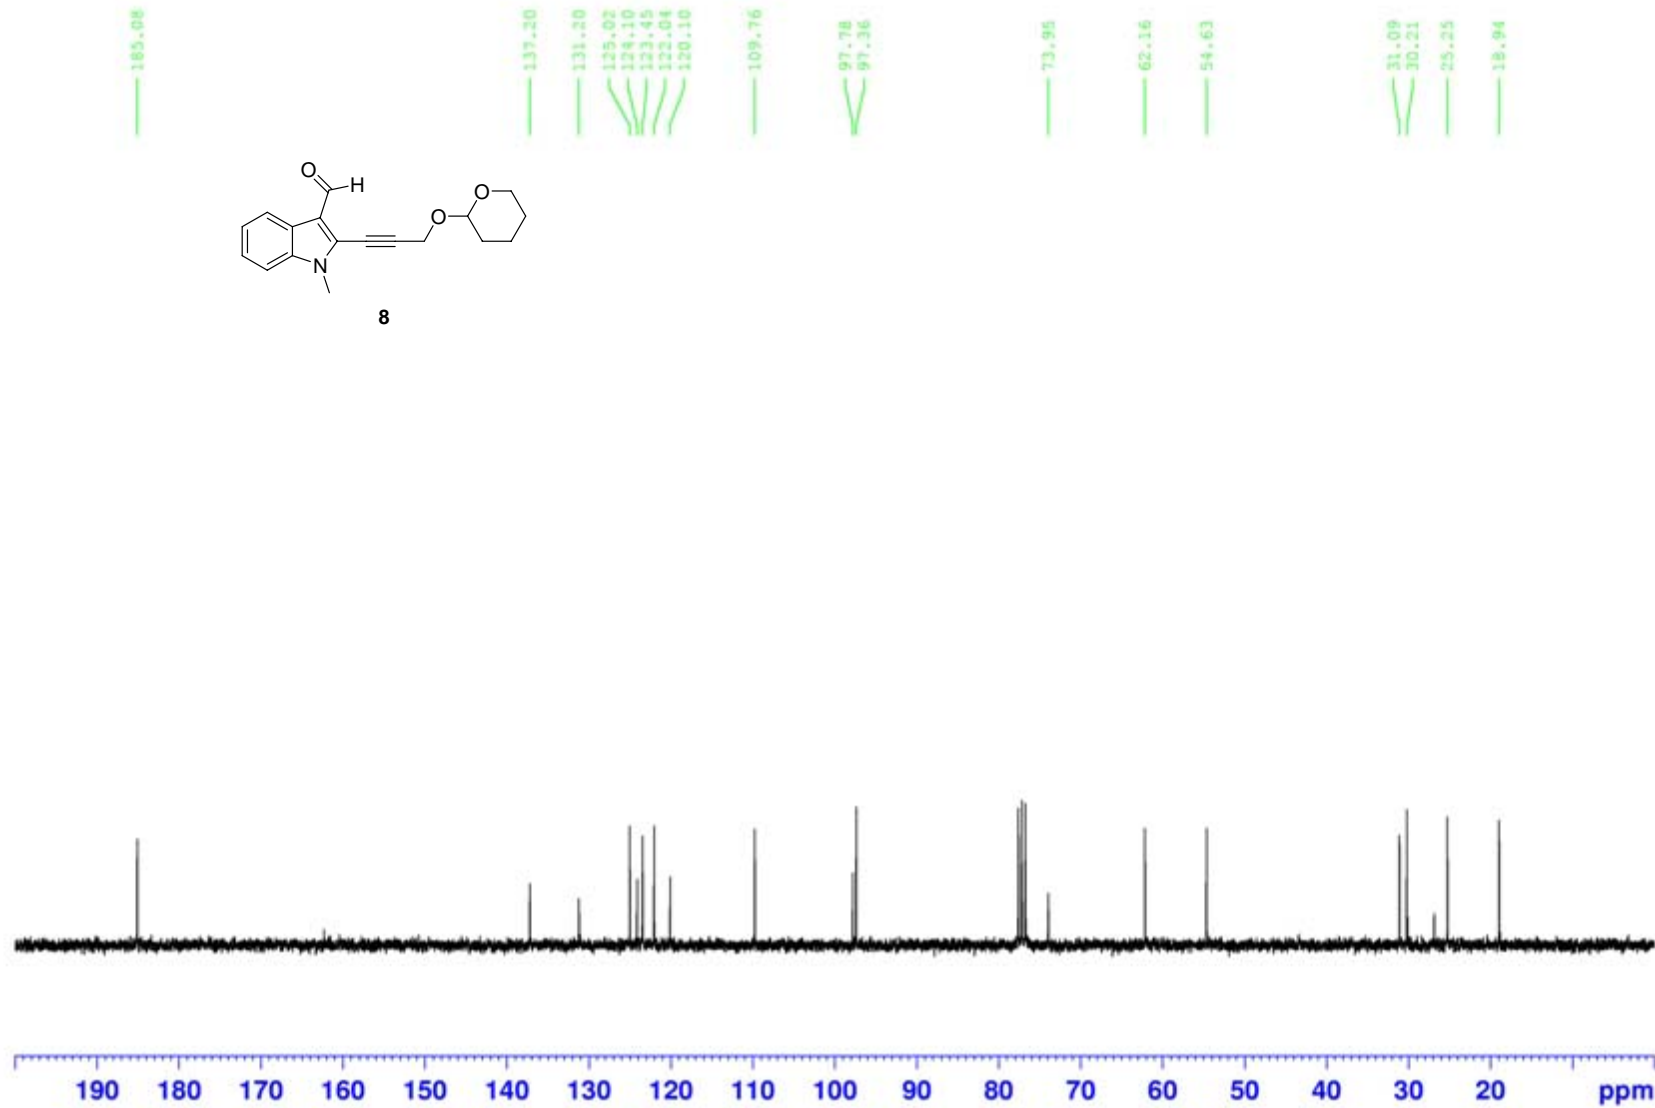

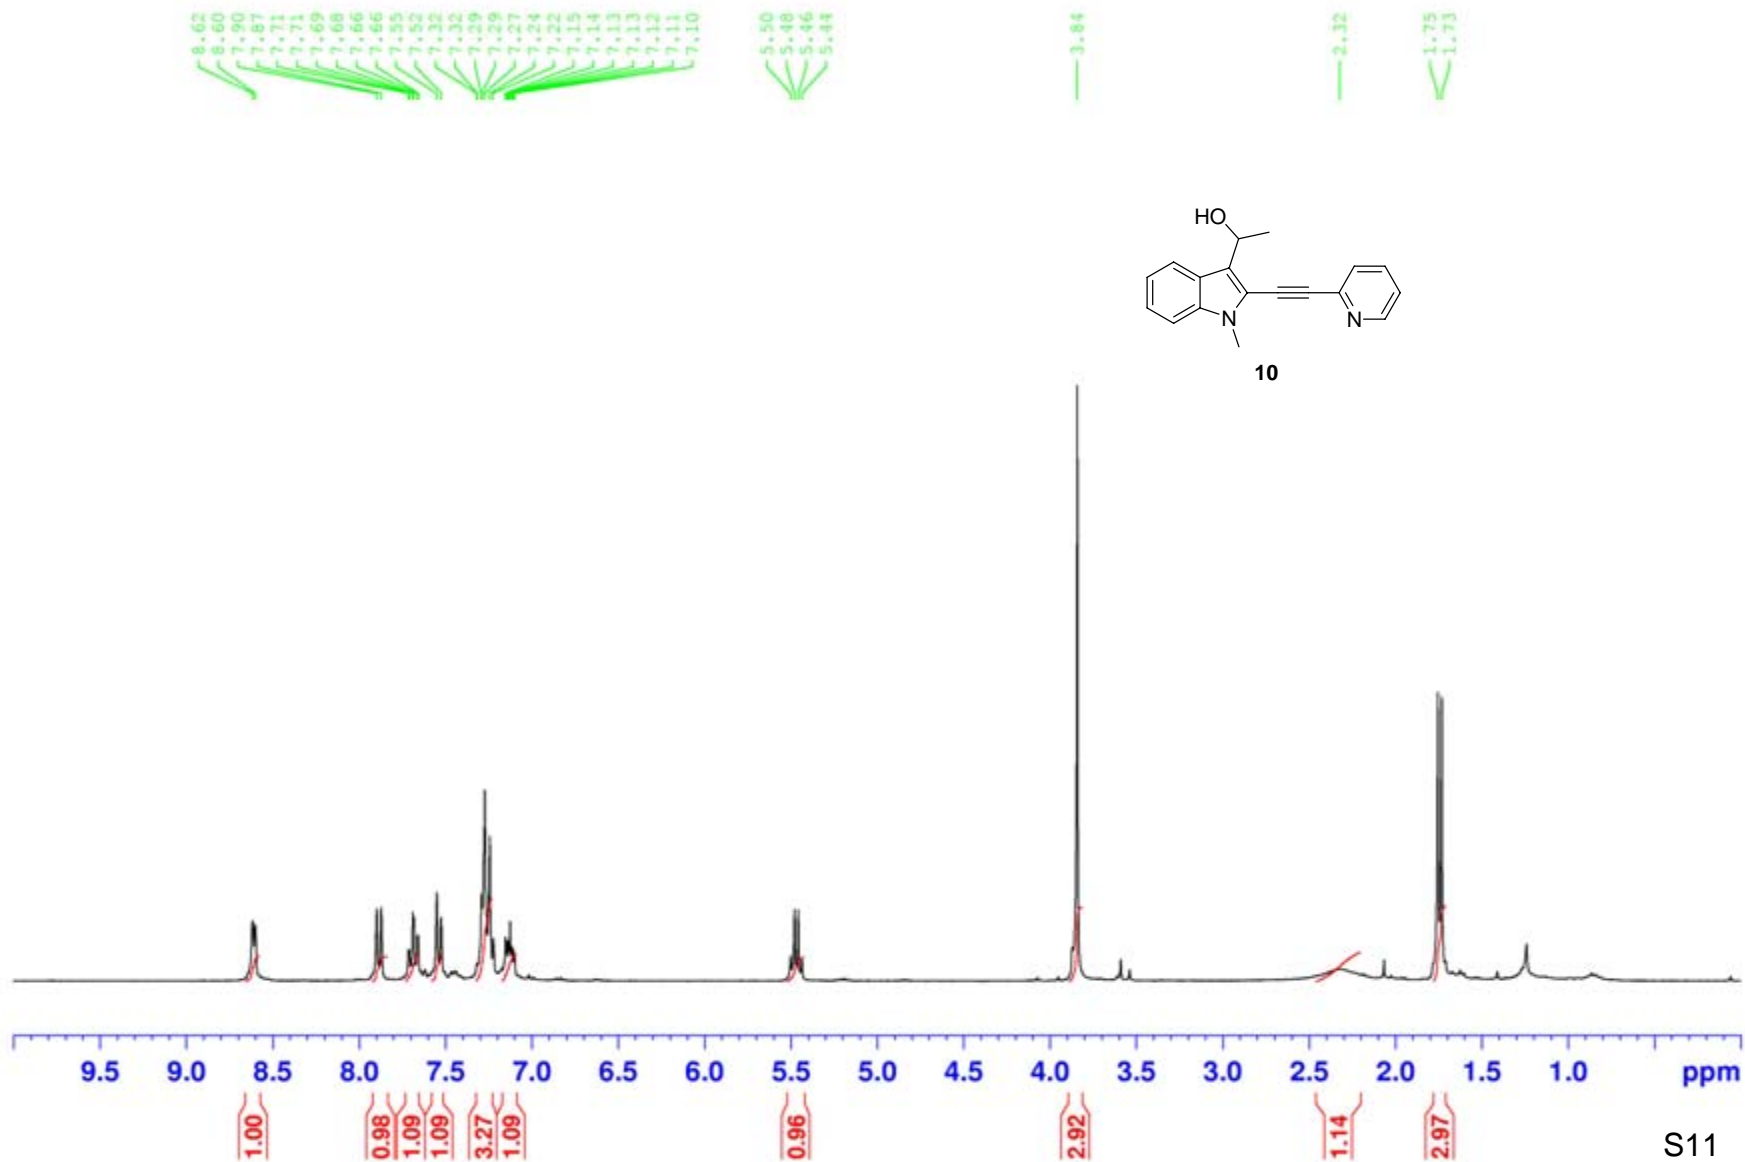

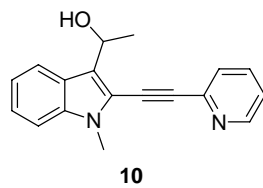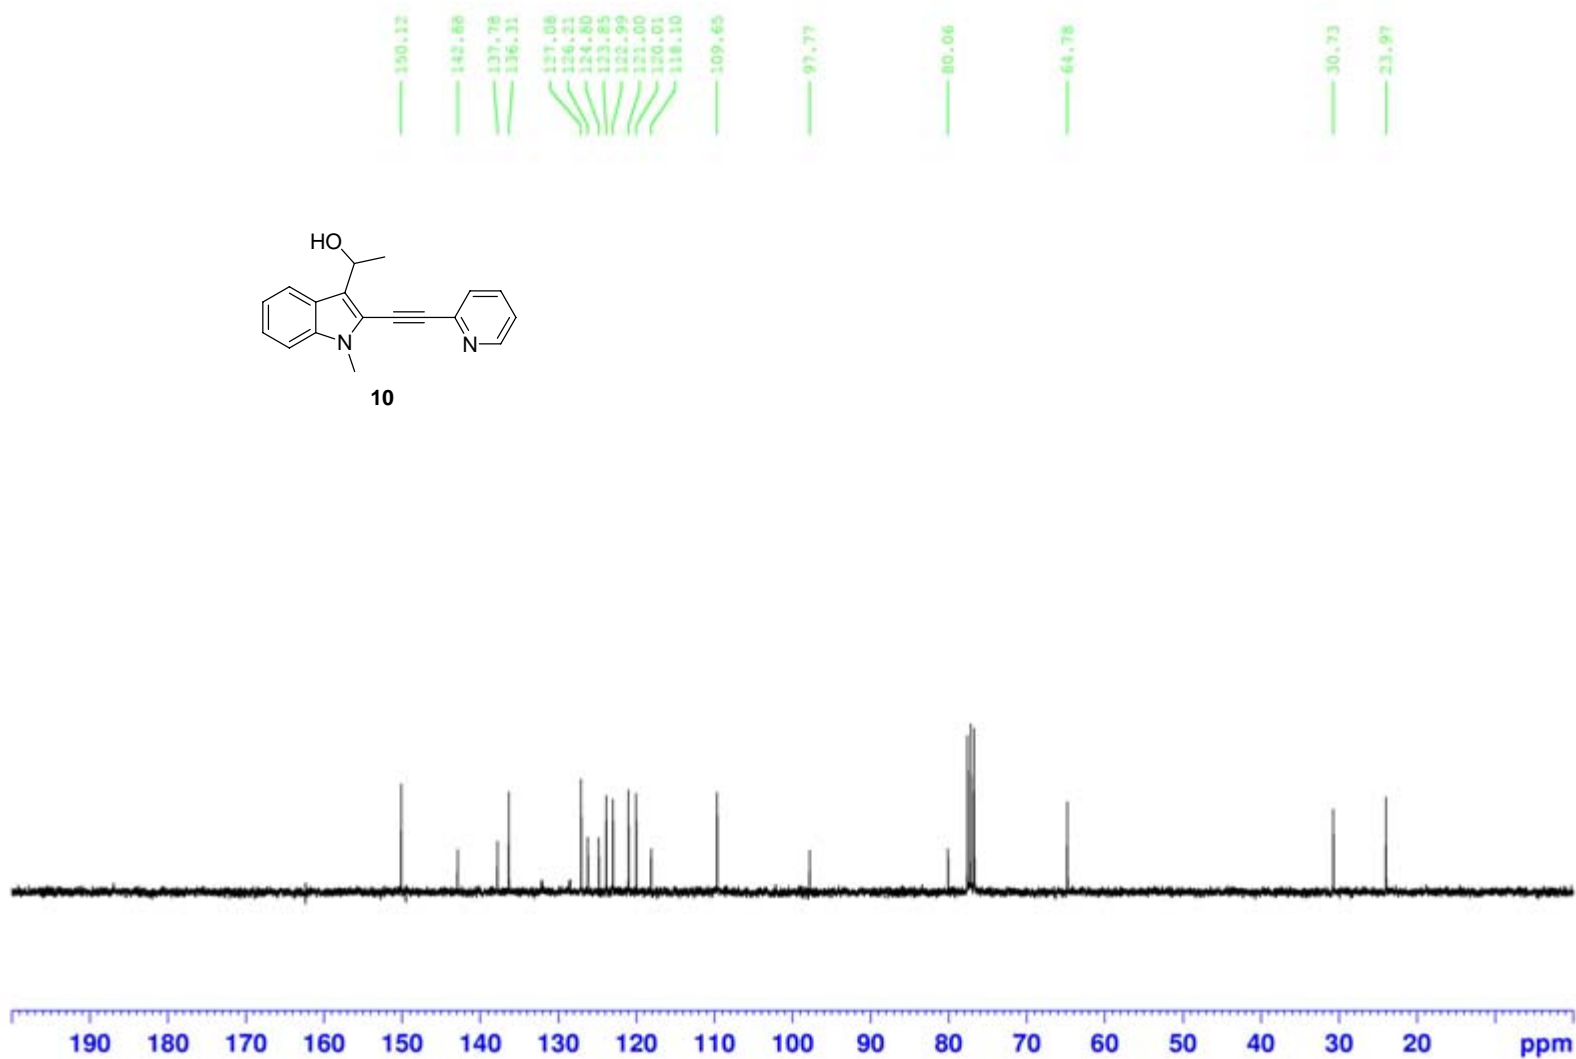

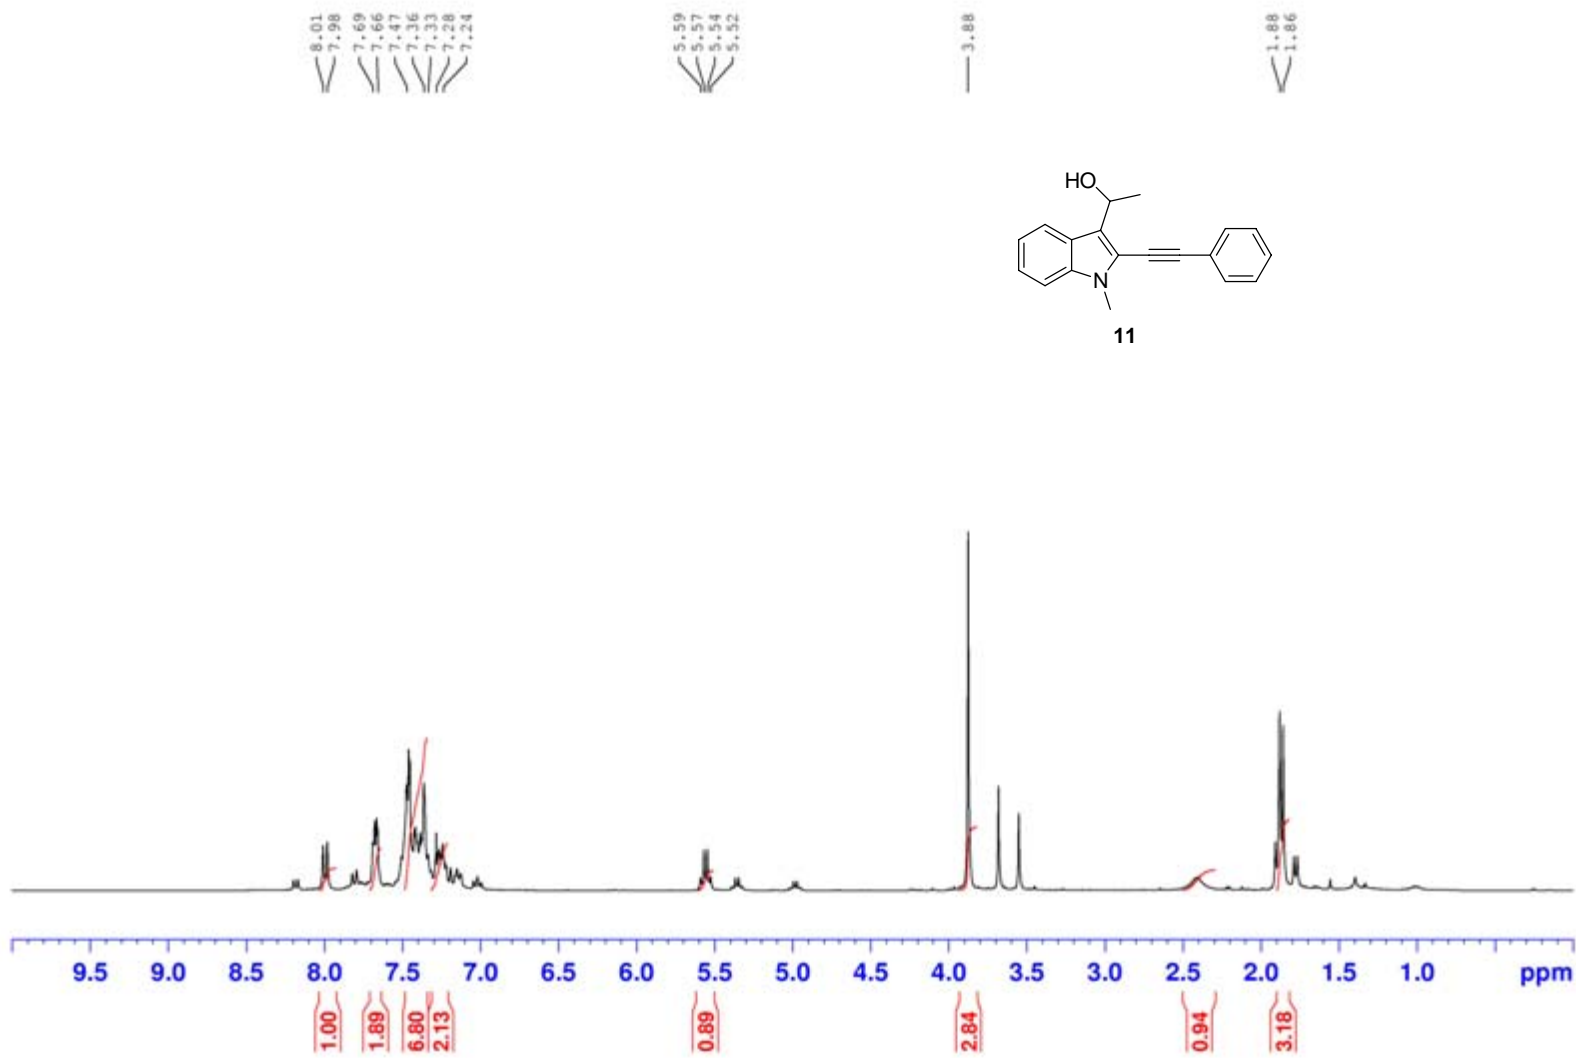

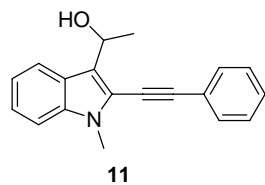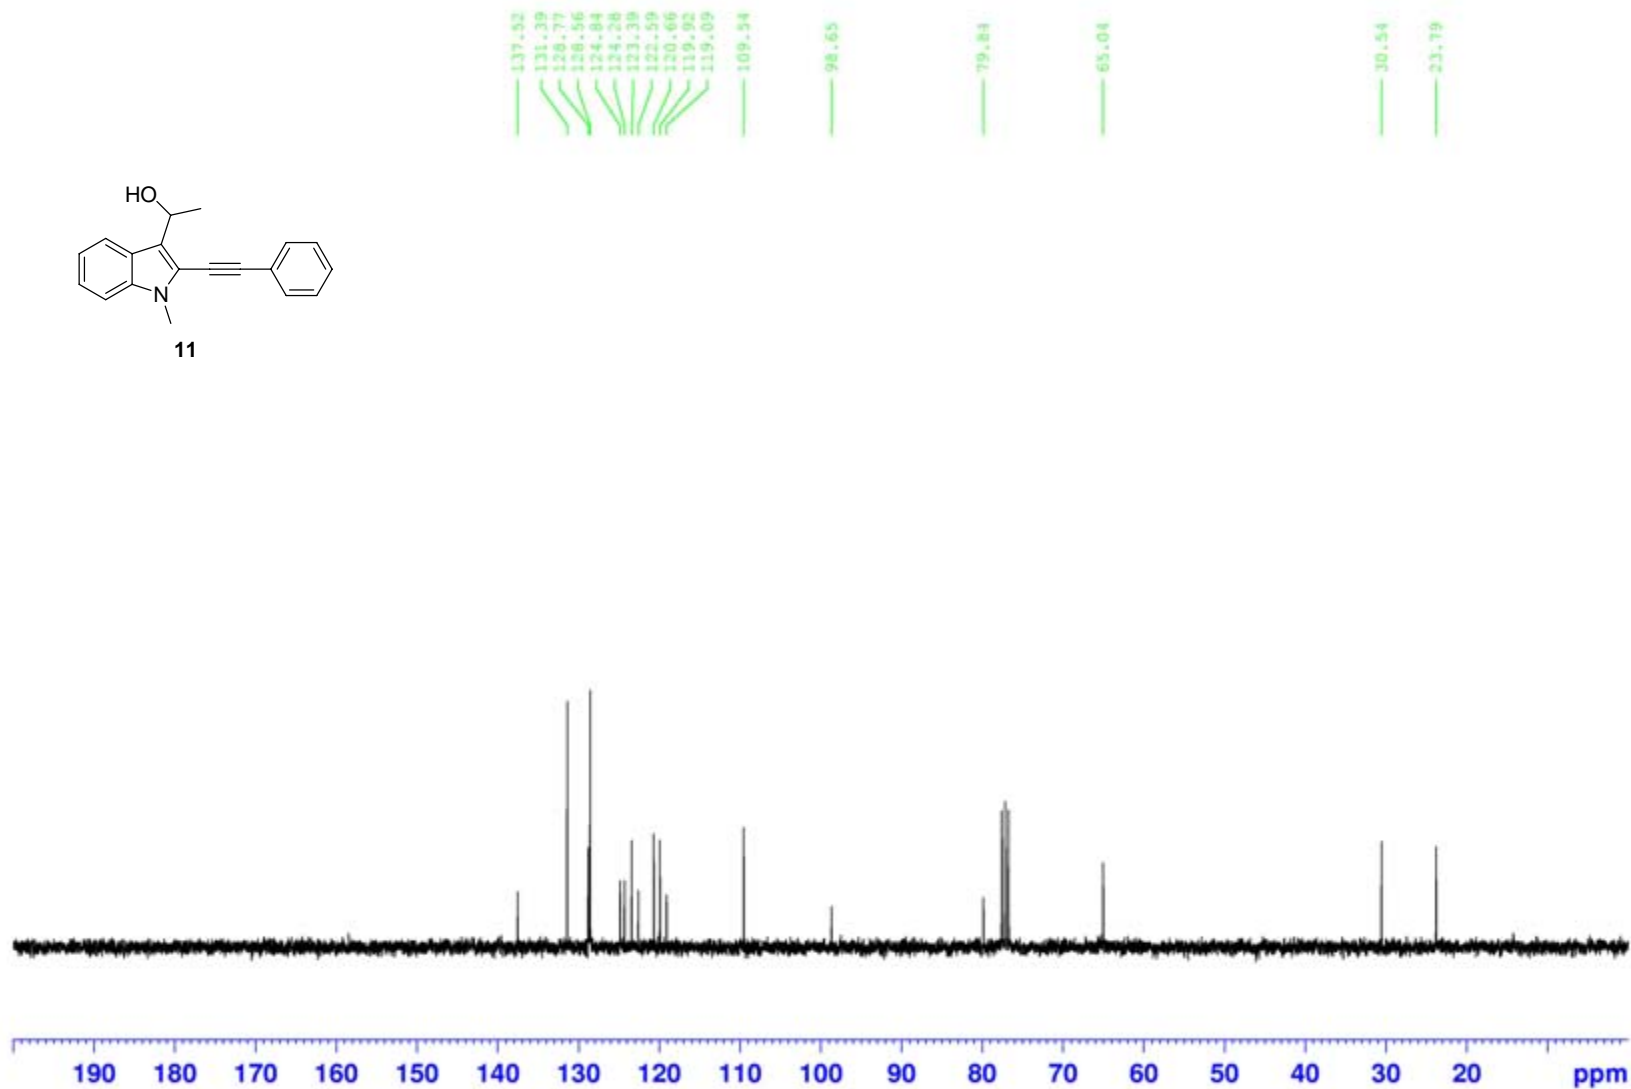

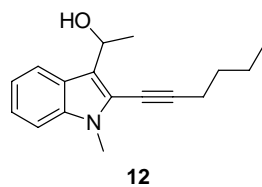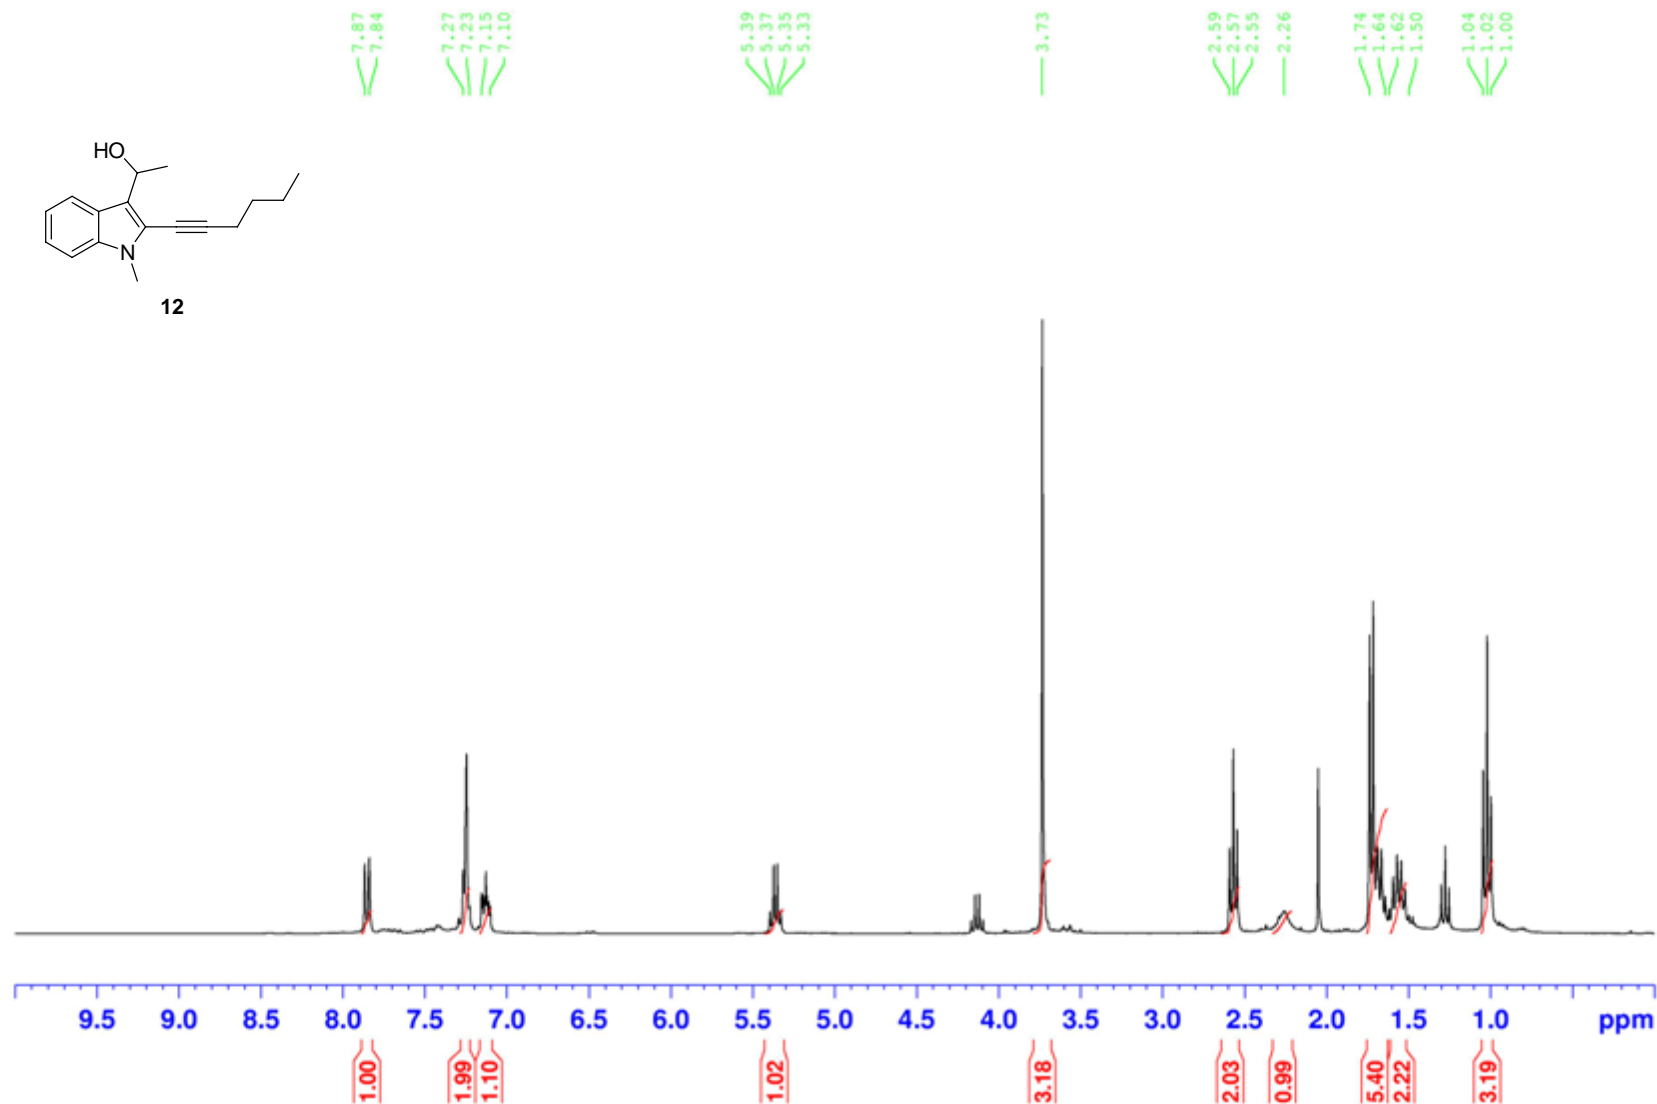

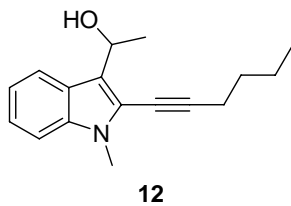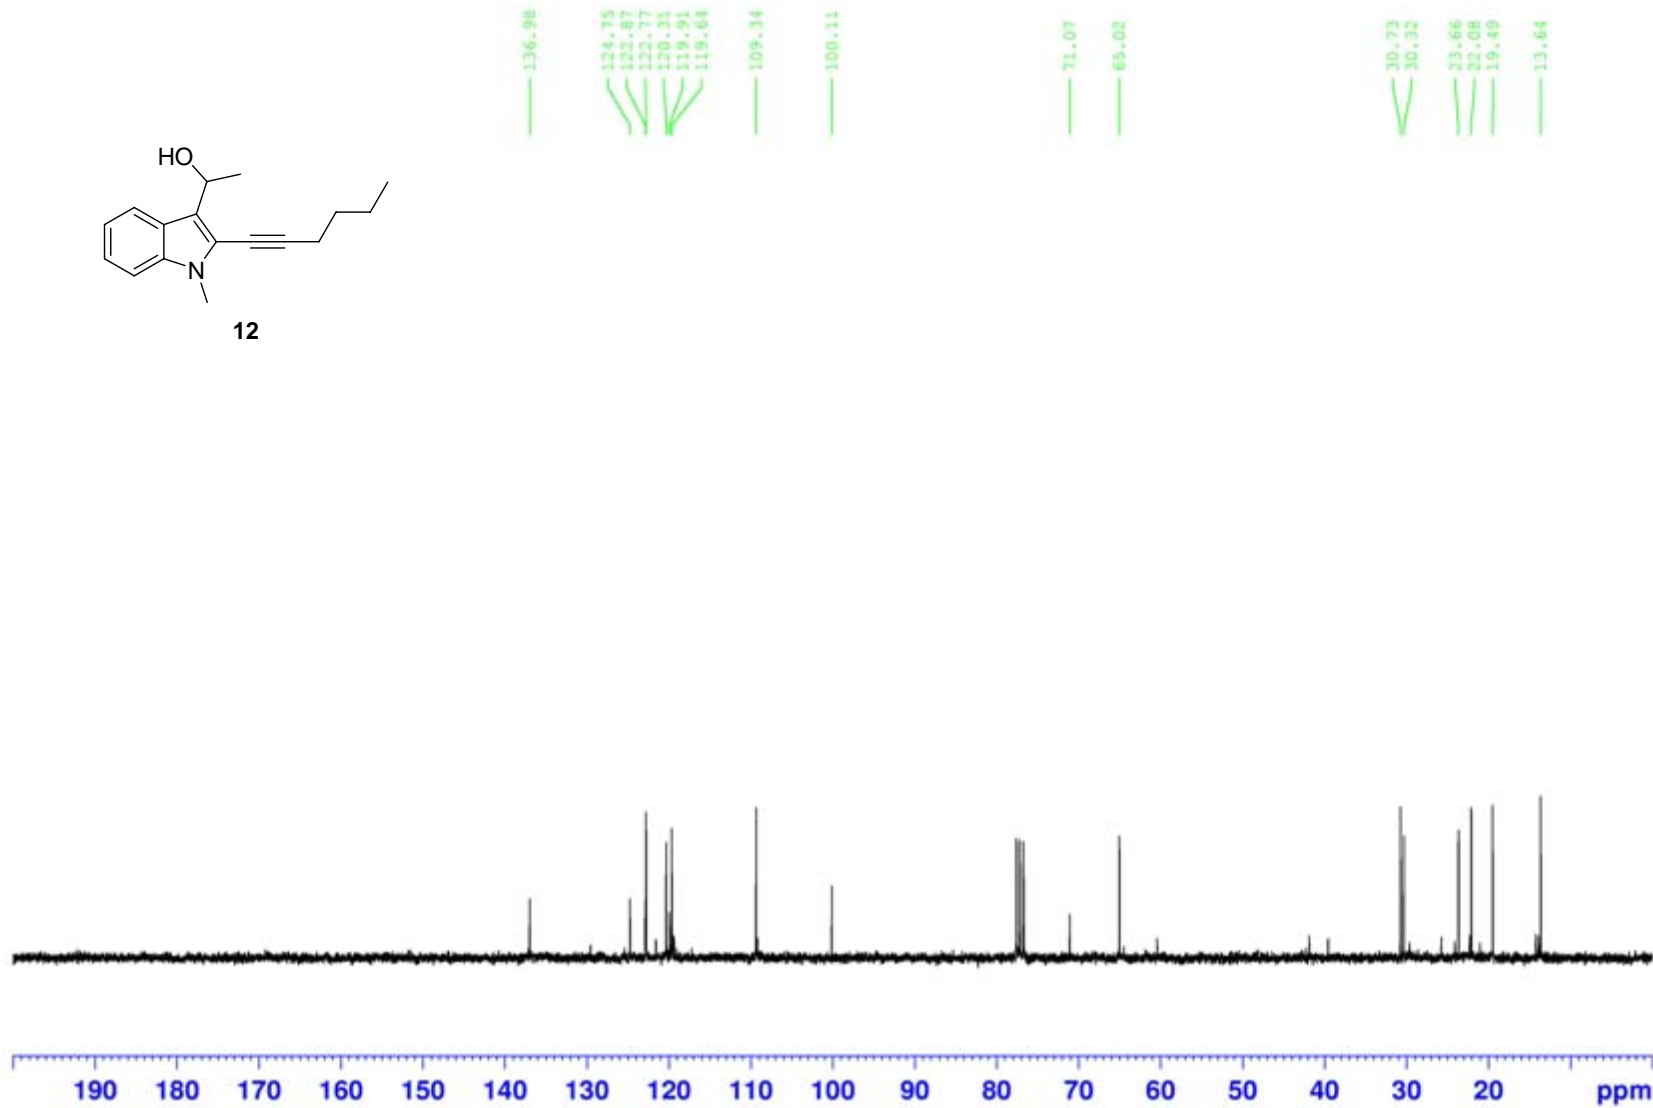



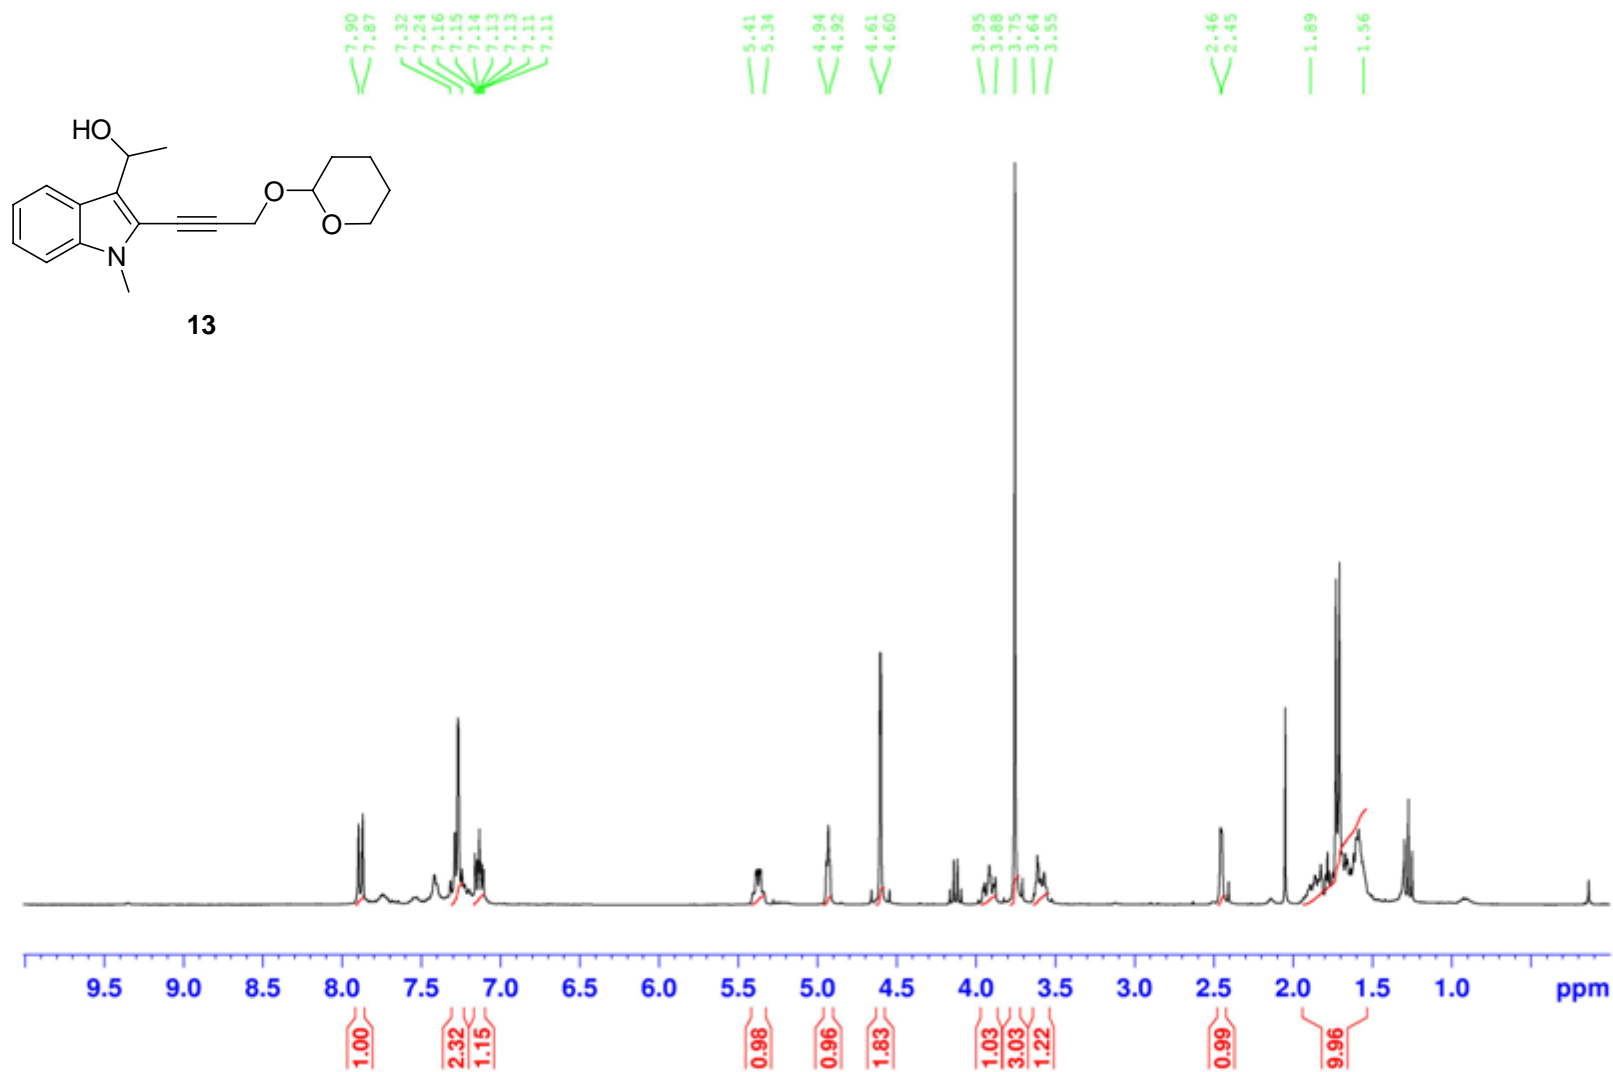

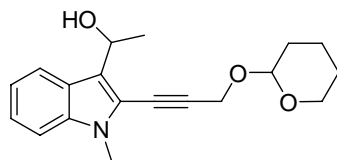

13

137.29

124.78

124.56

123.36

120.73

119.79

118.37

109.48

97.06

94.79

76.37

64.79

62.10

54.89

30.47

30.25

29.31

23.76

19.02

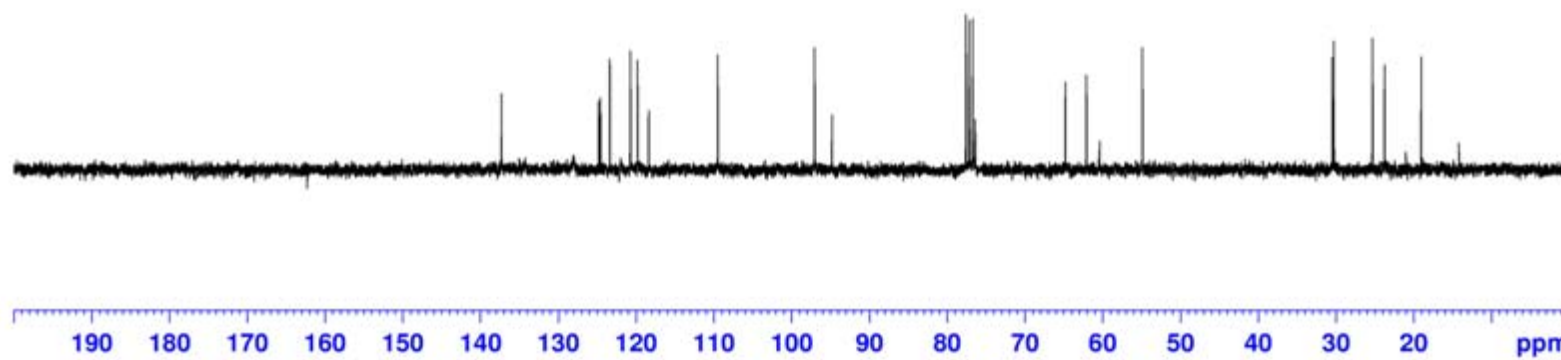

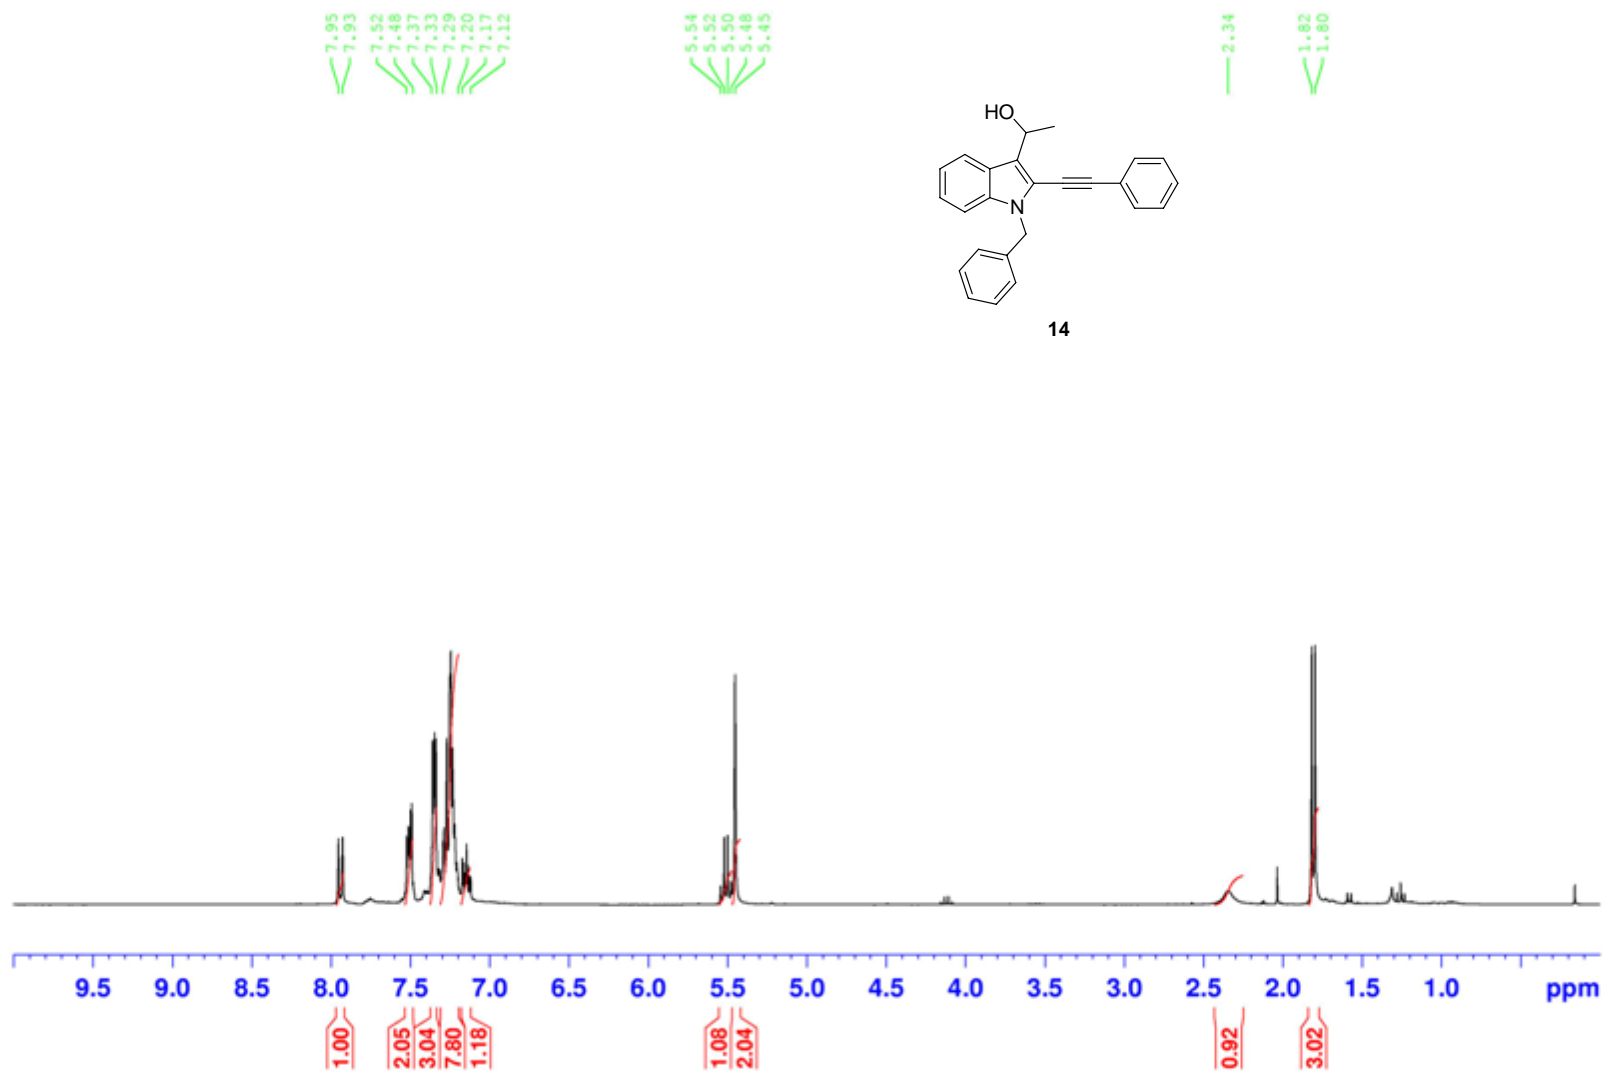

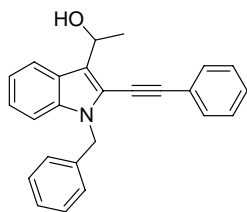

14

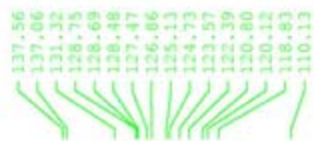

99.83

79.90

65.86

47.92

23.78

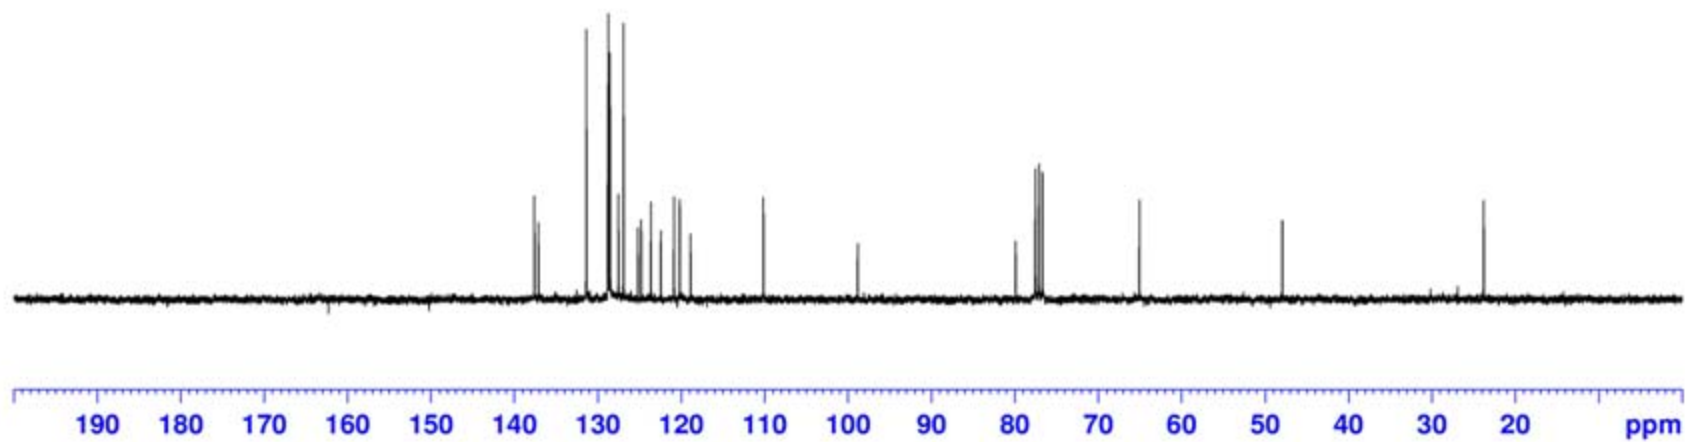

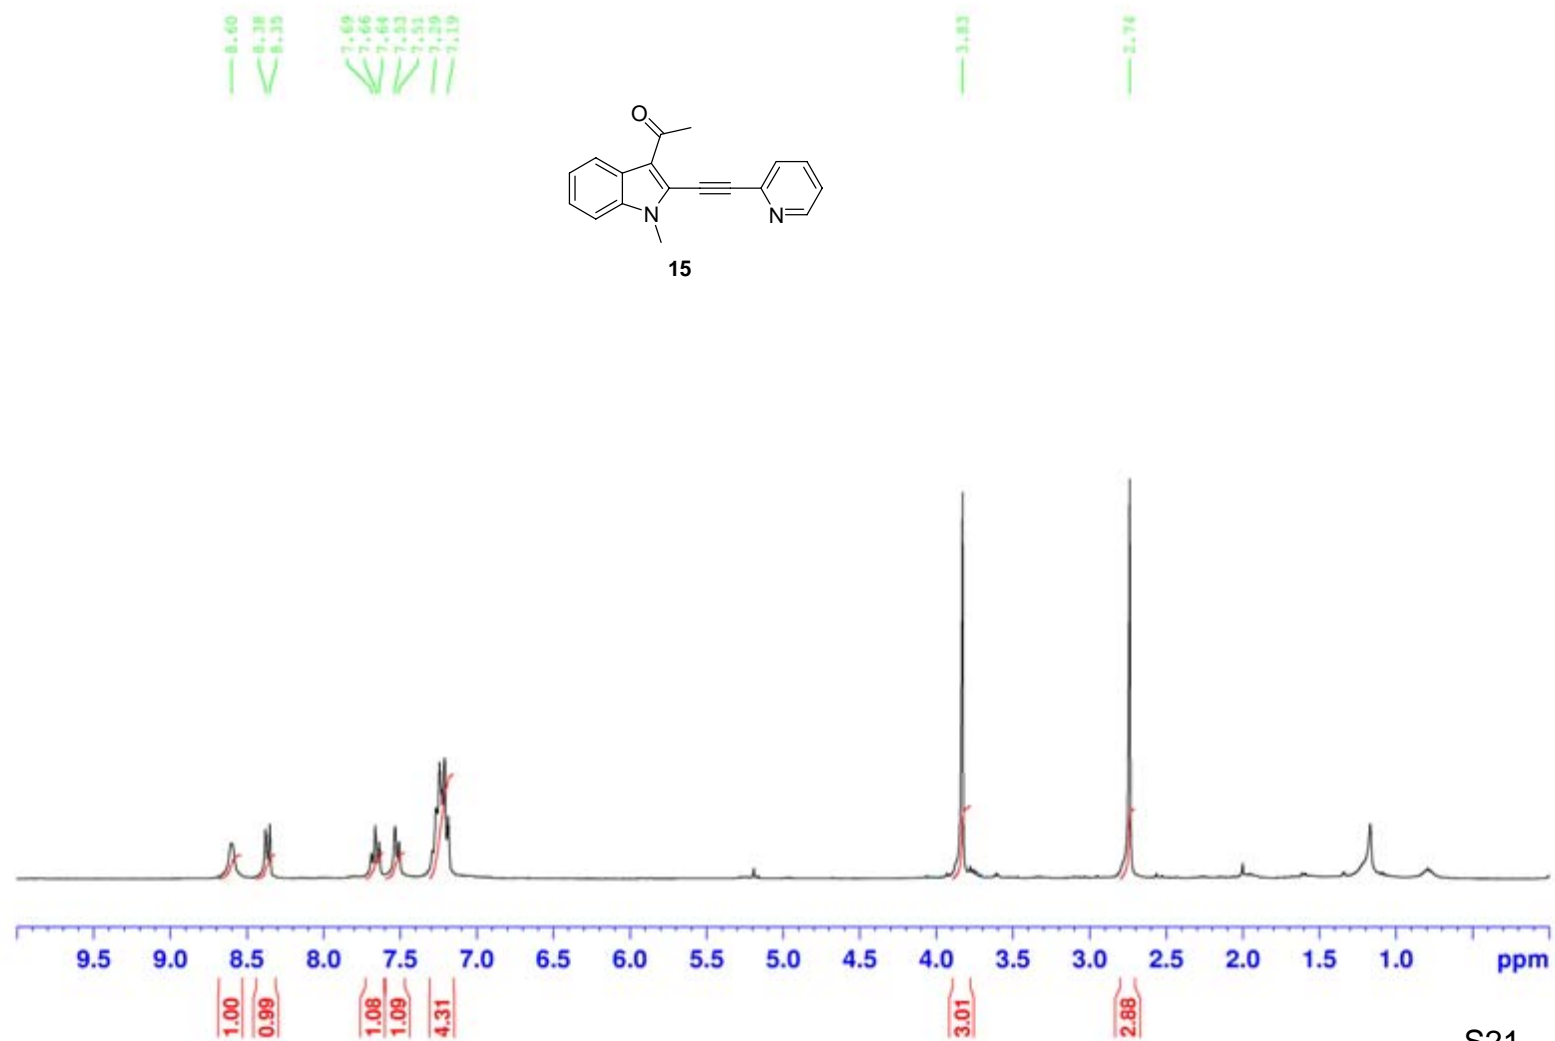

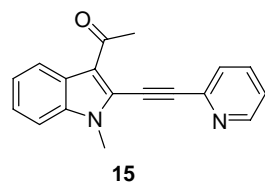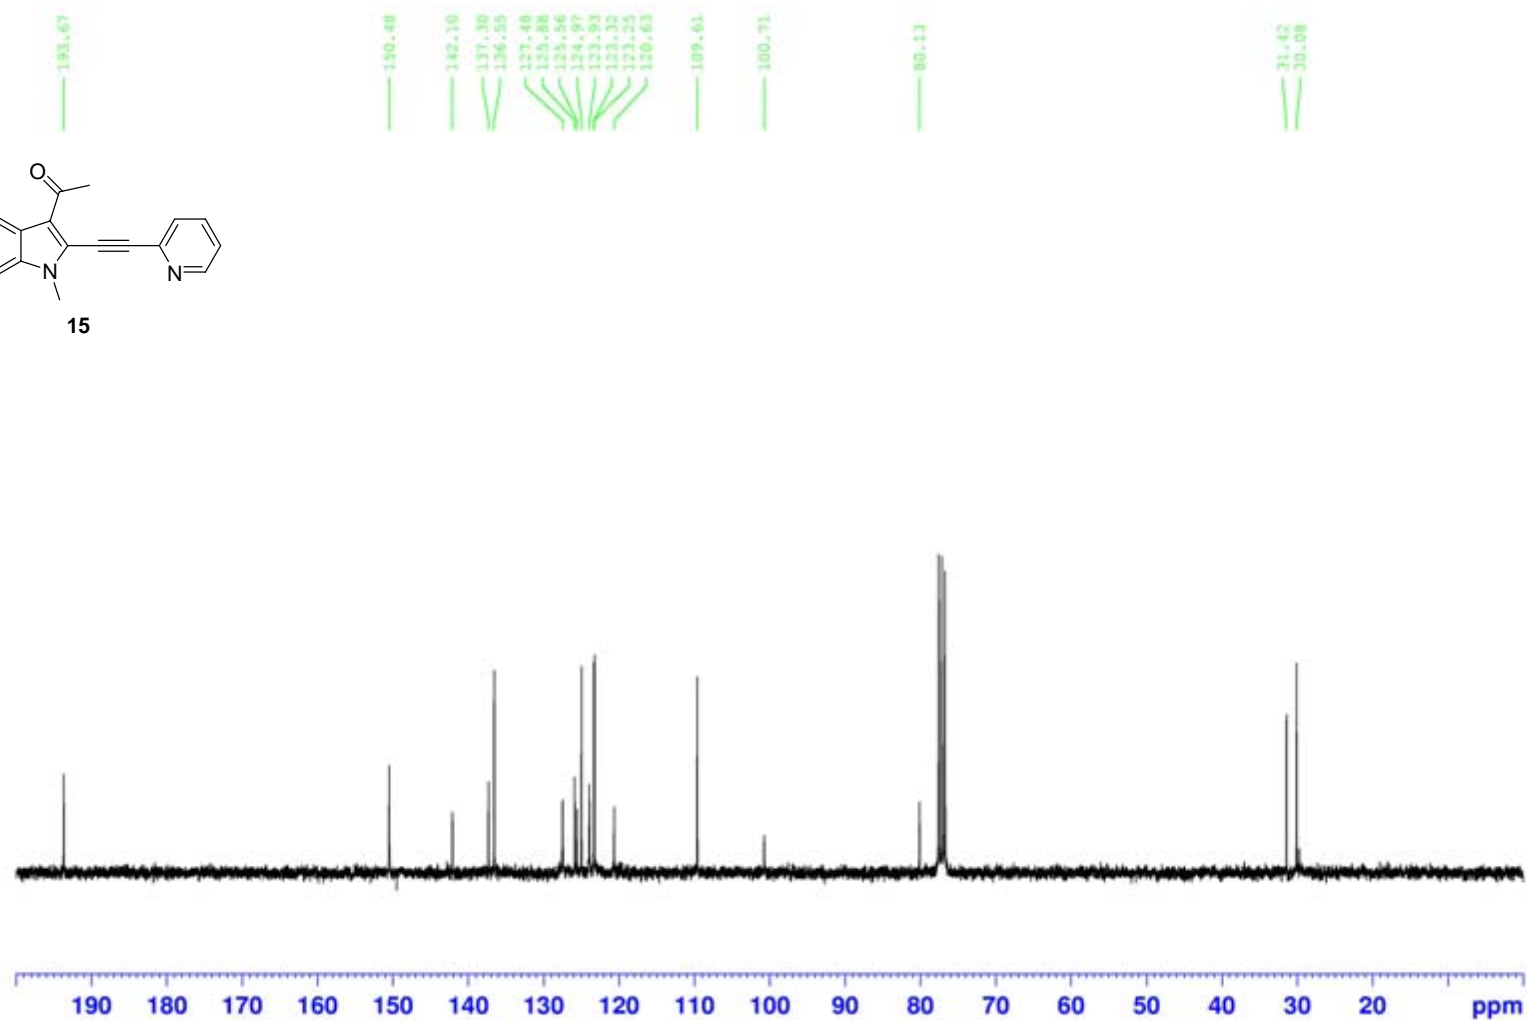

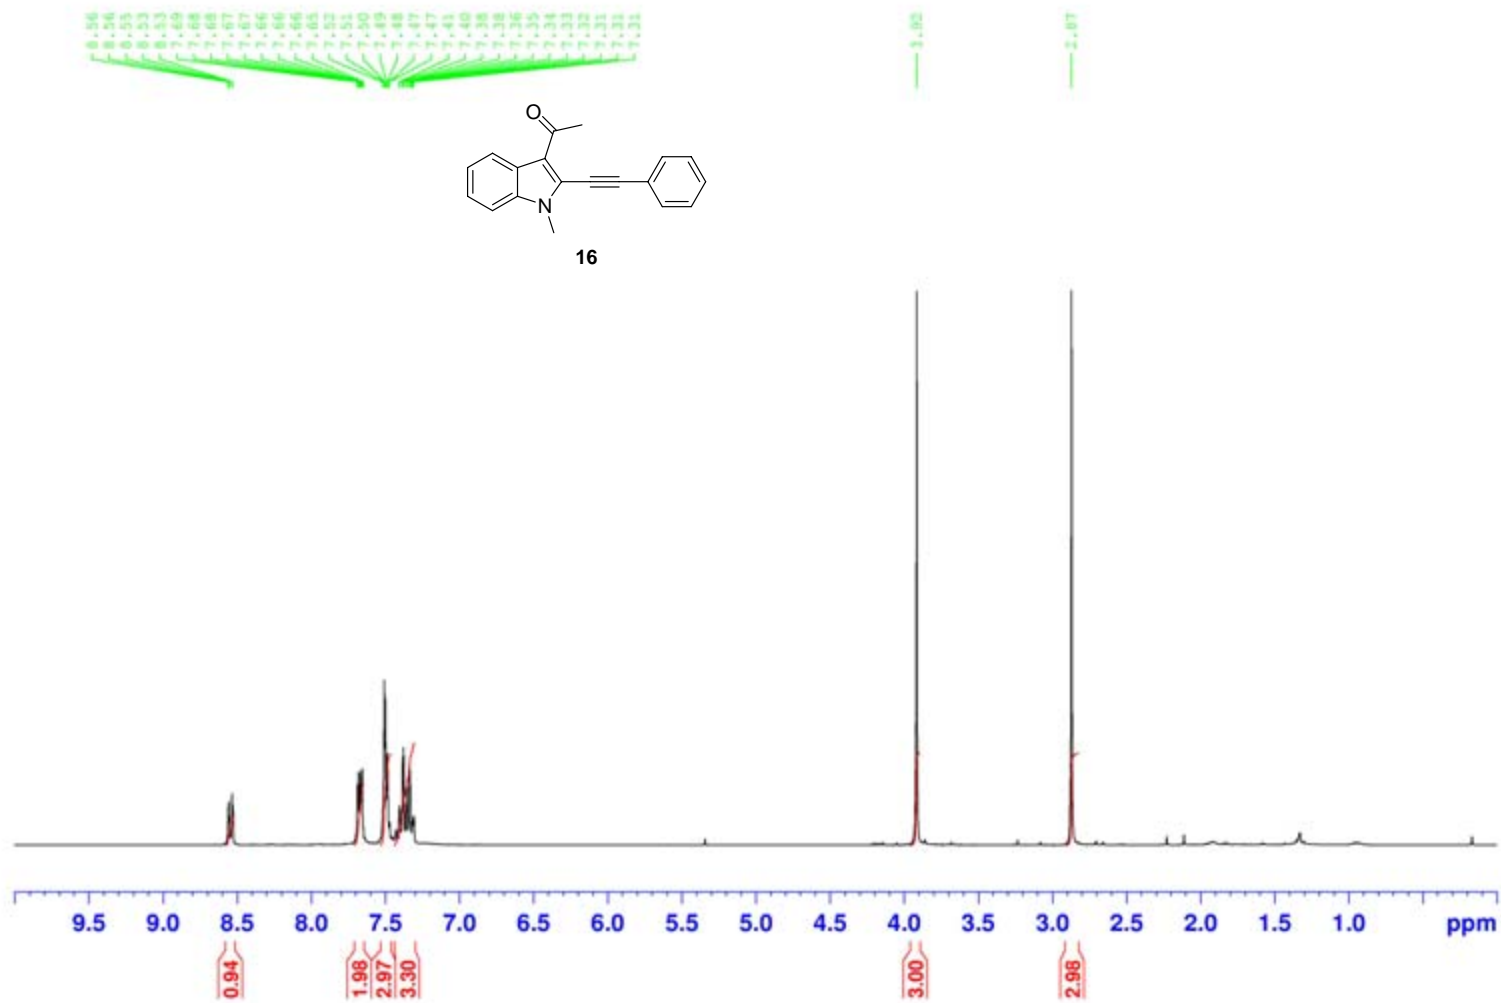

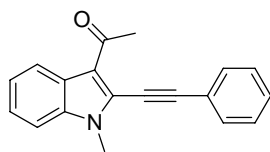

16

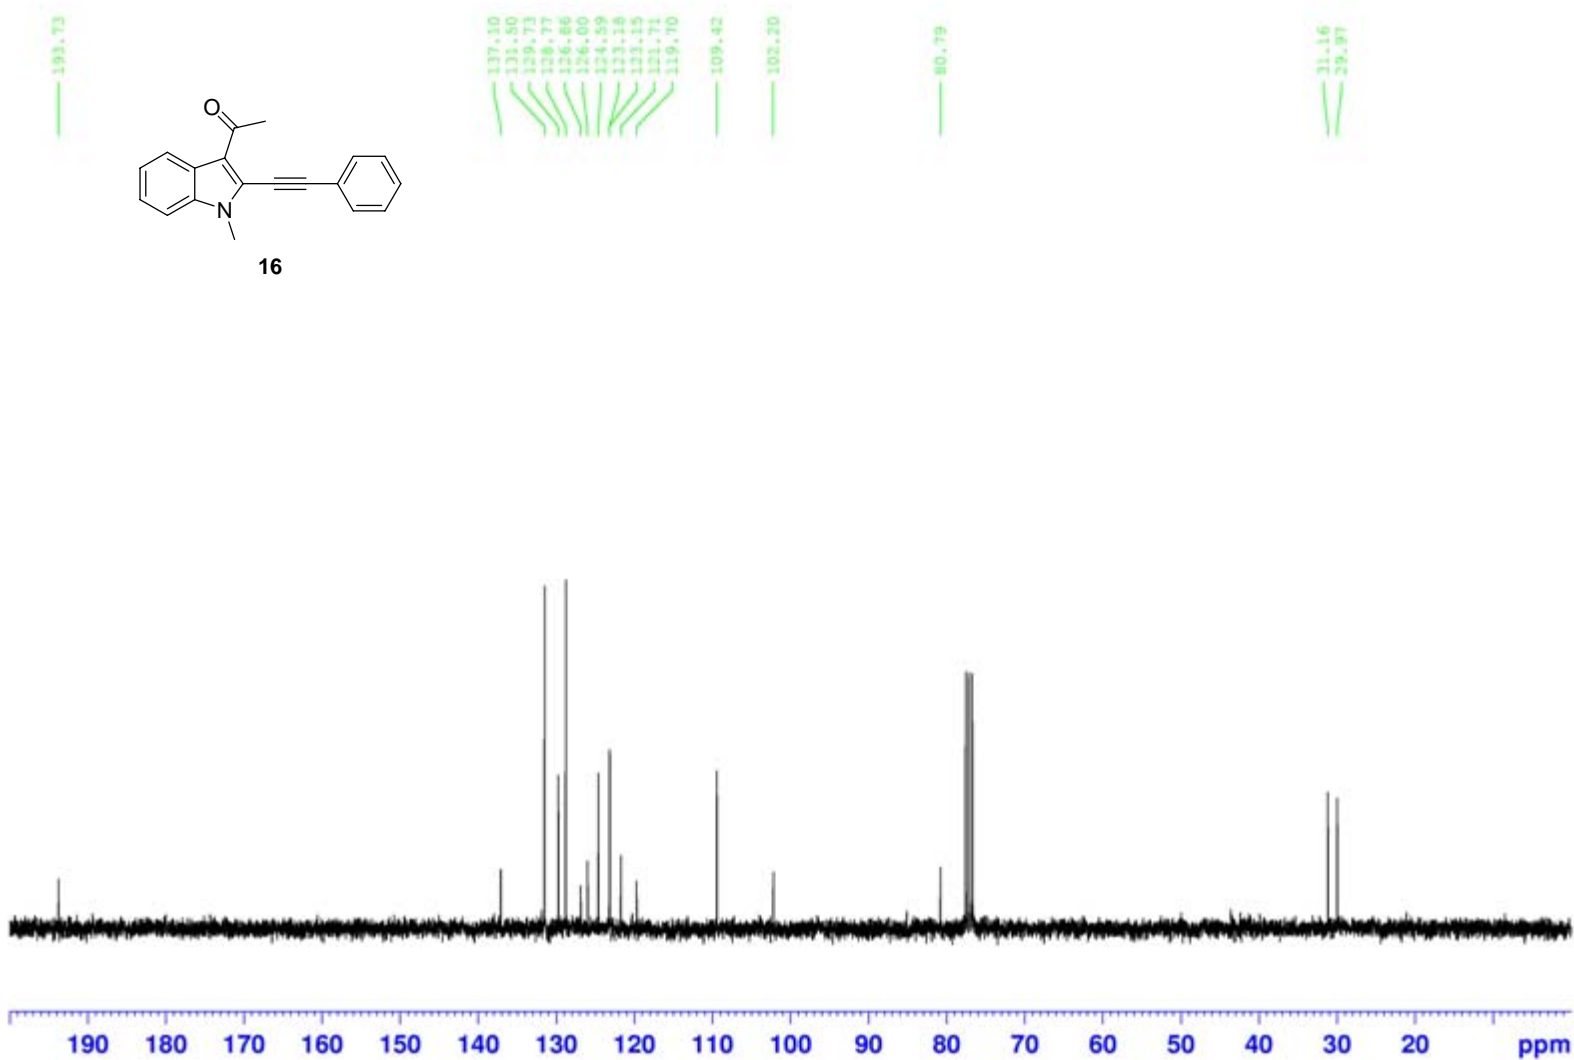



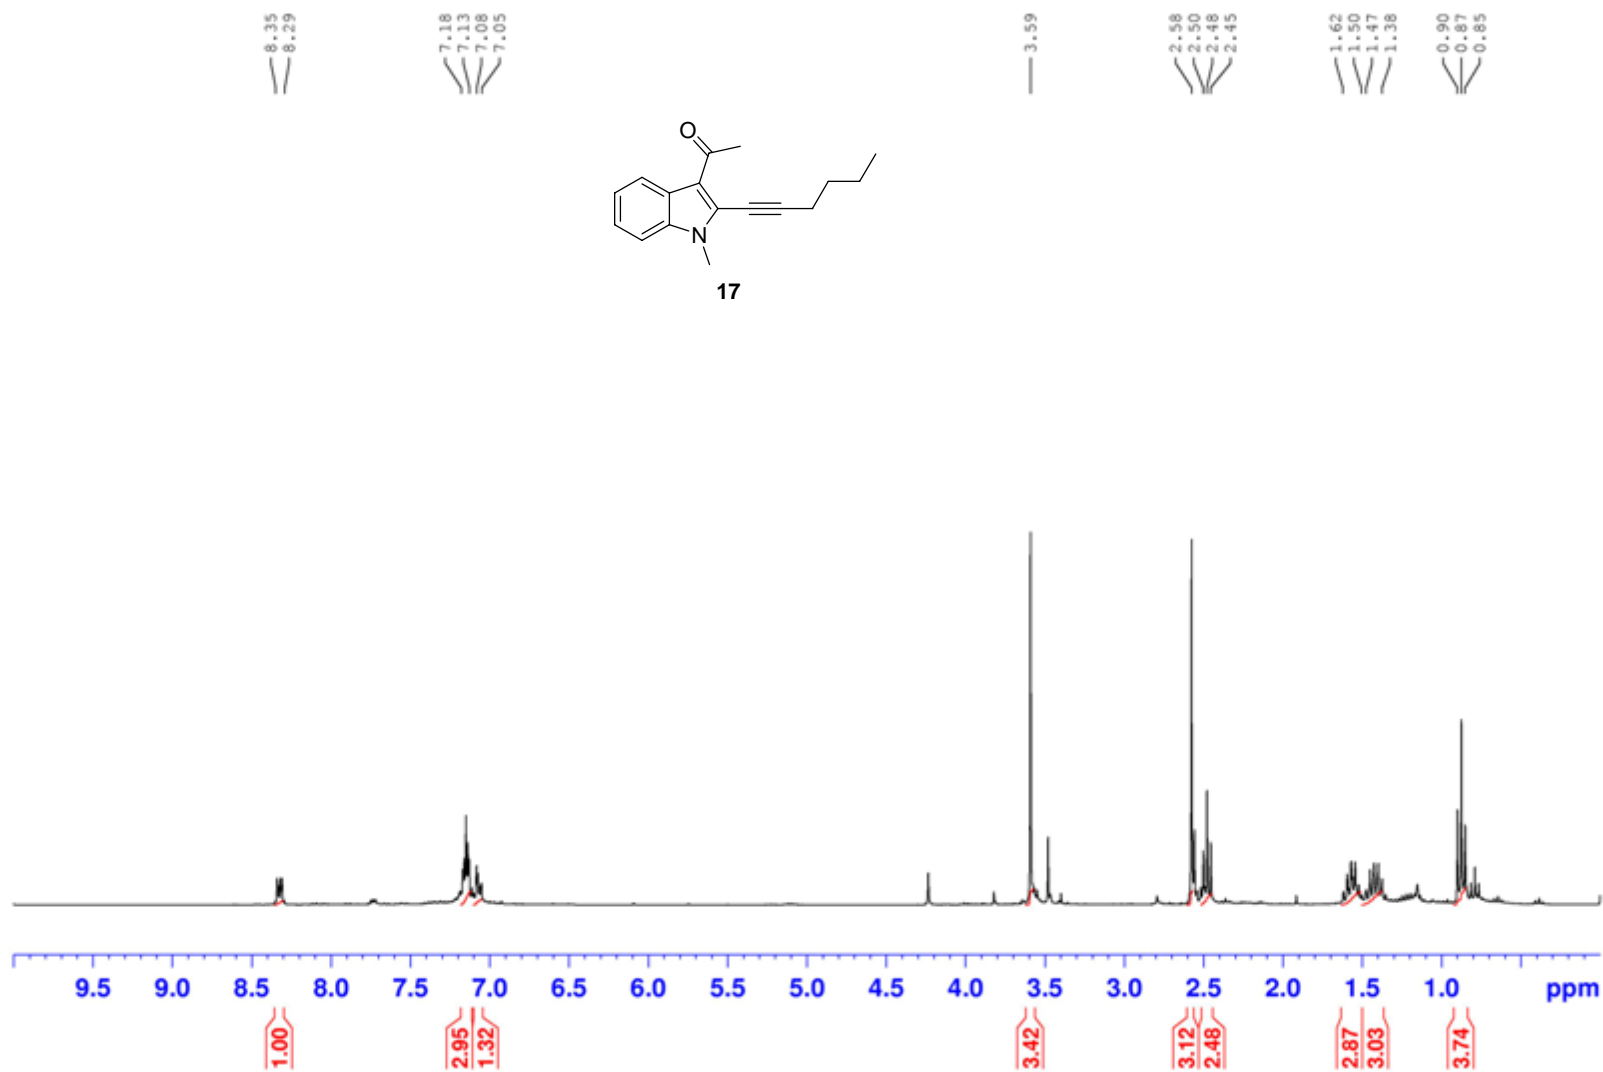

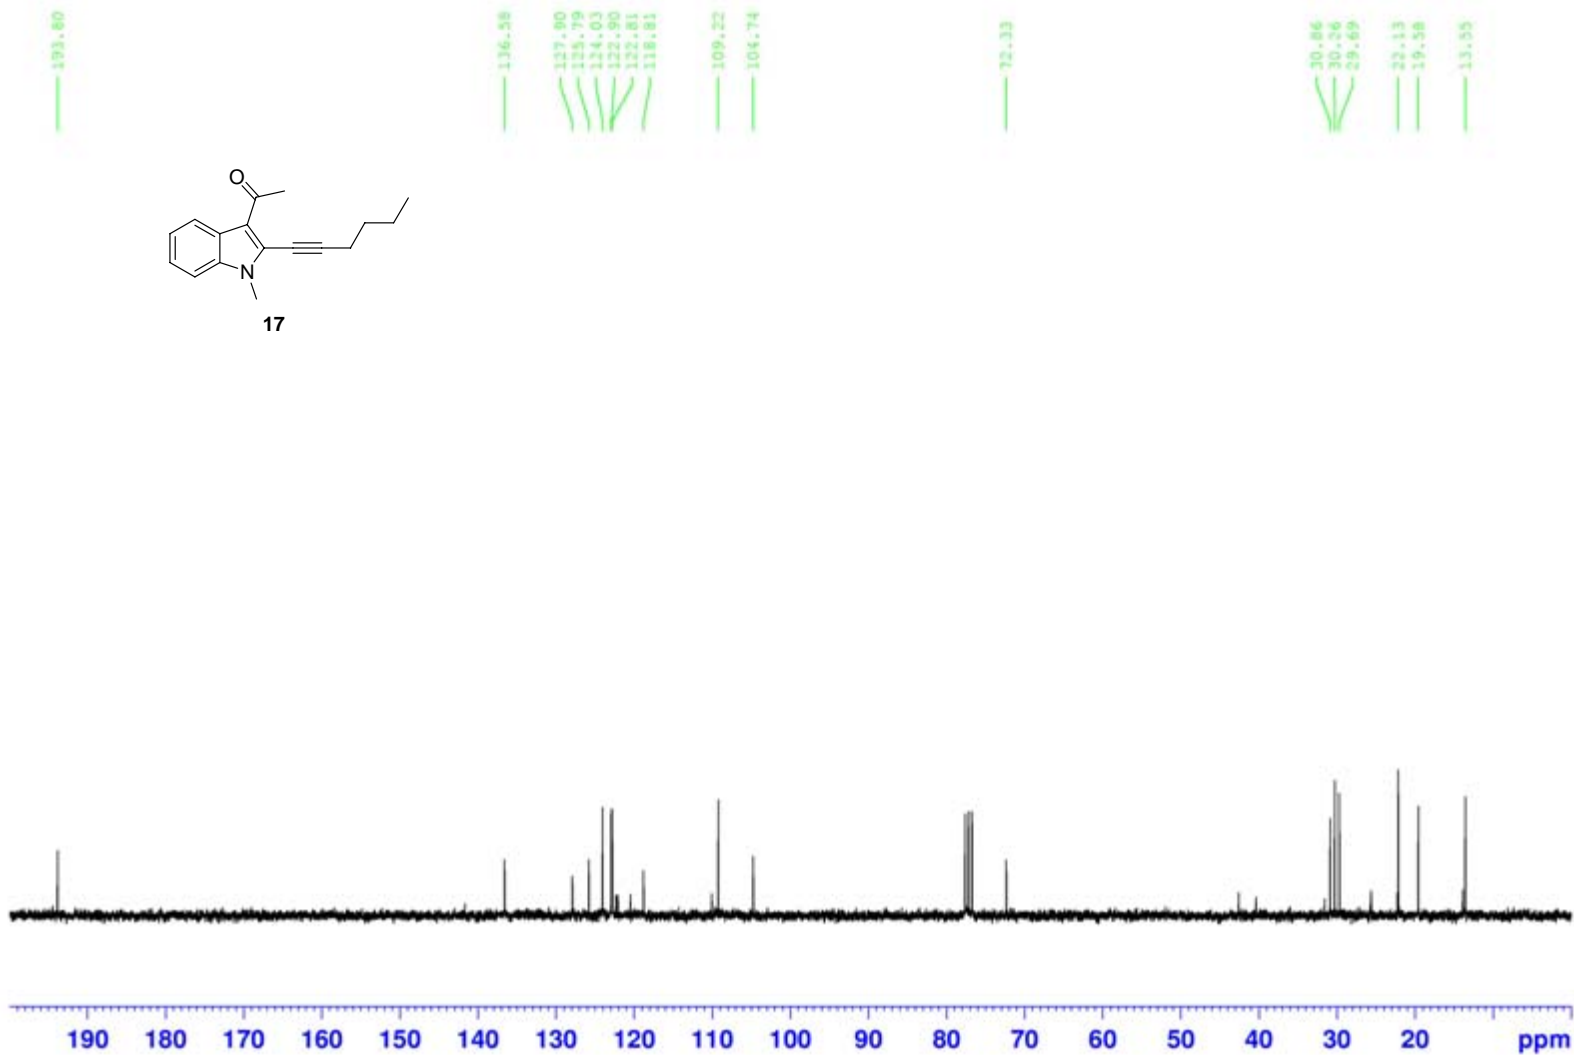

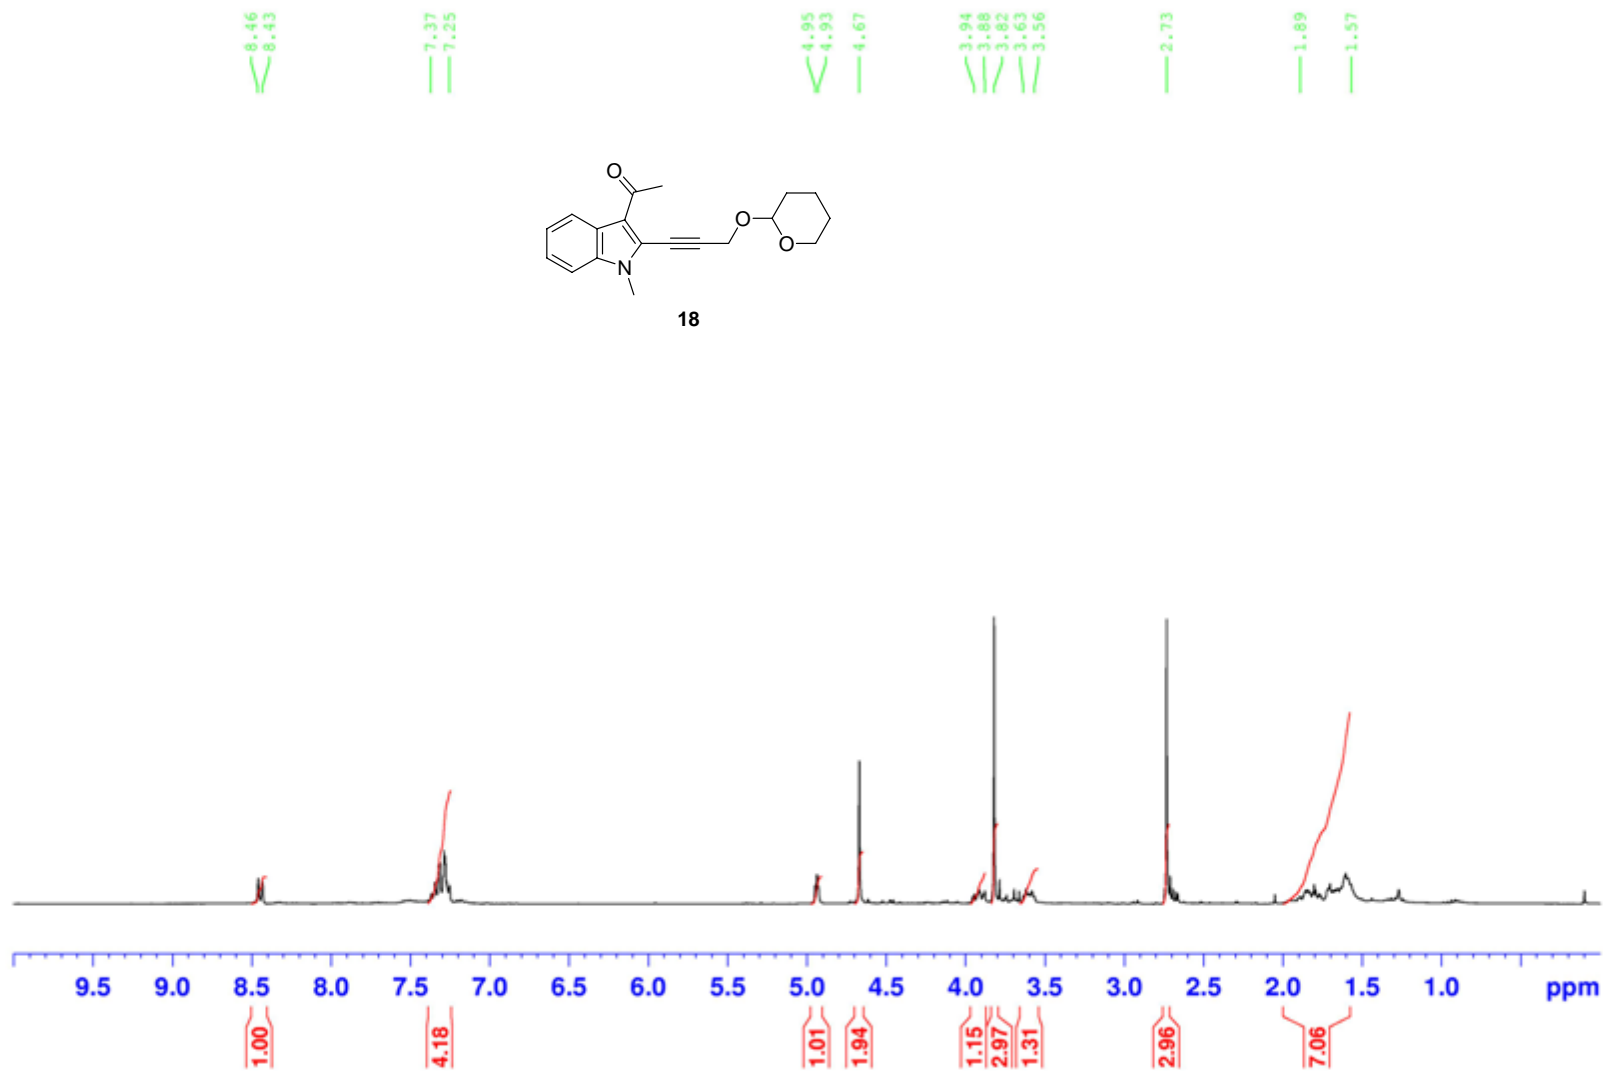

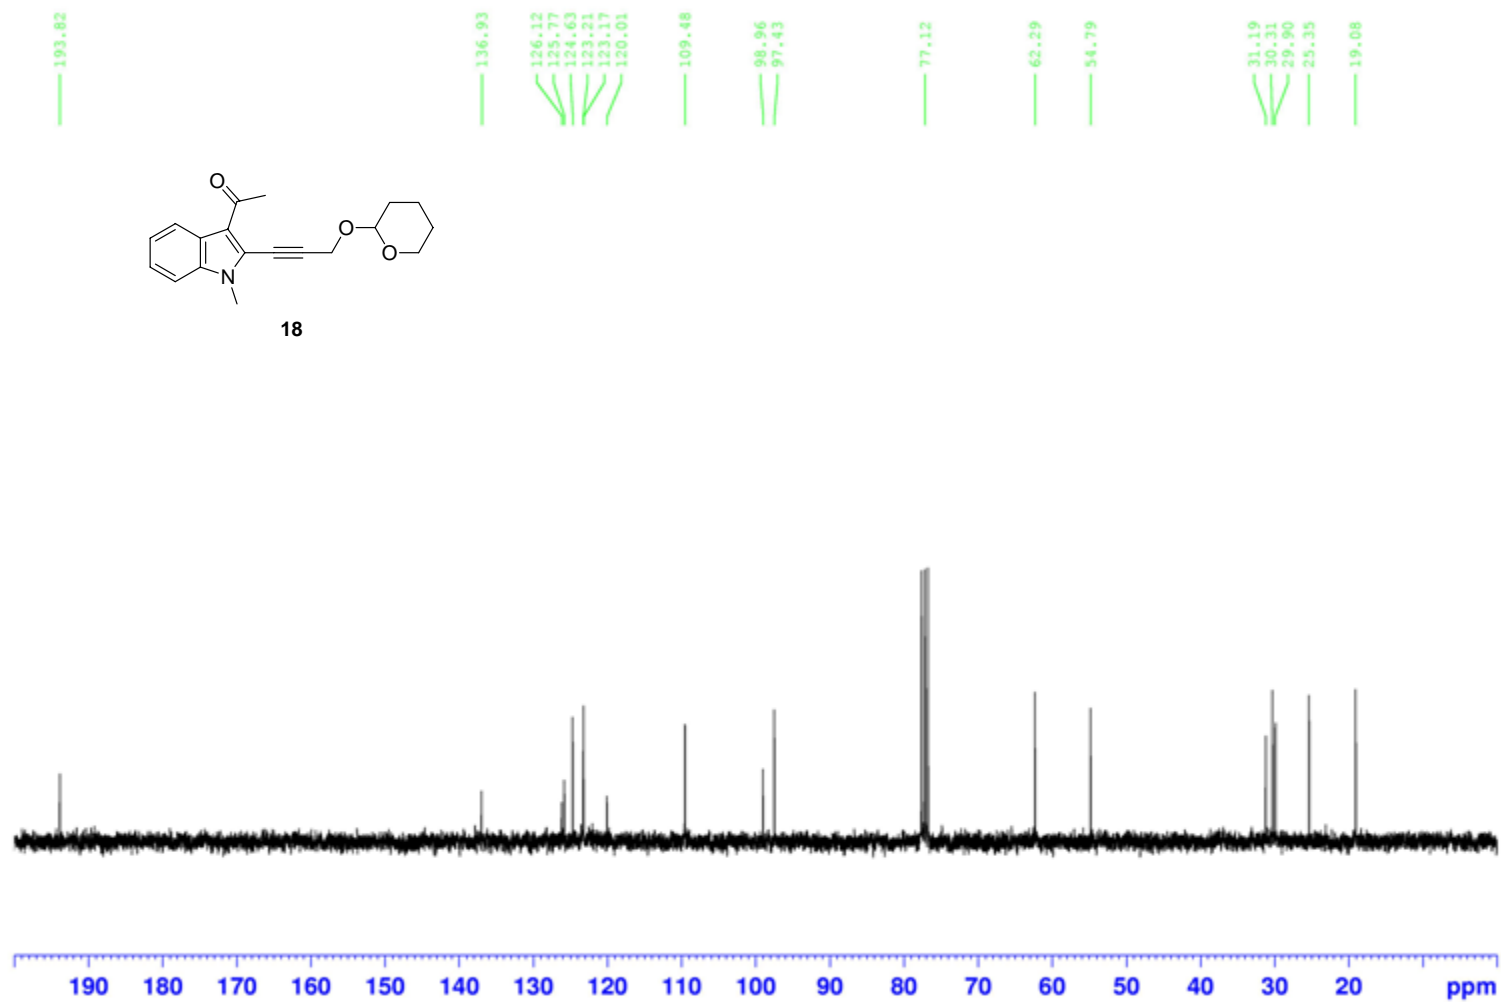

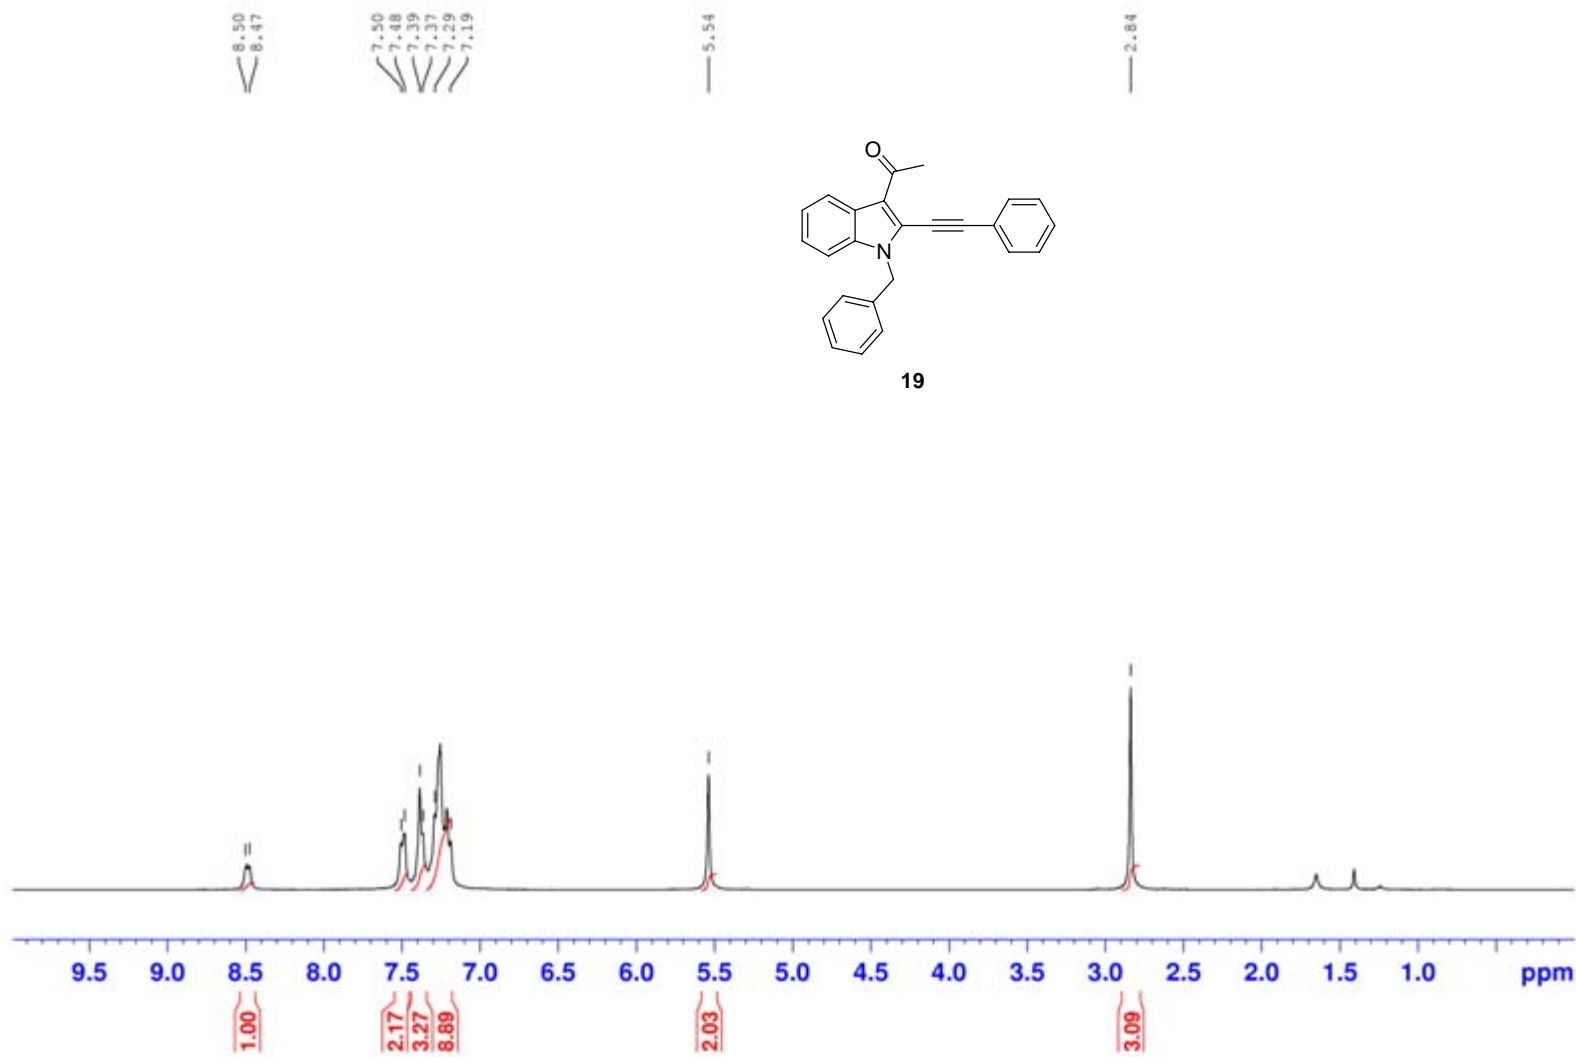

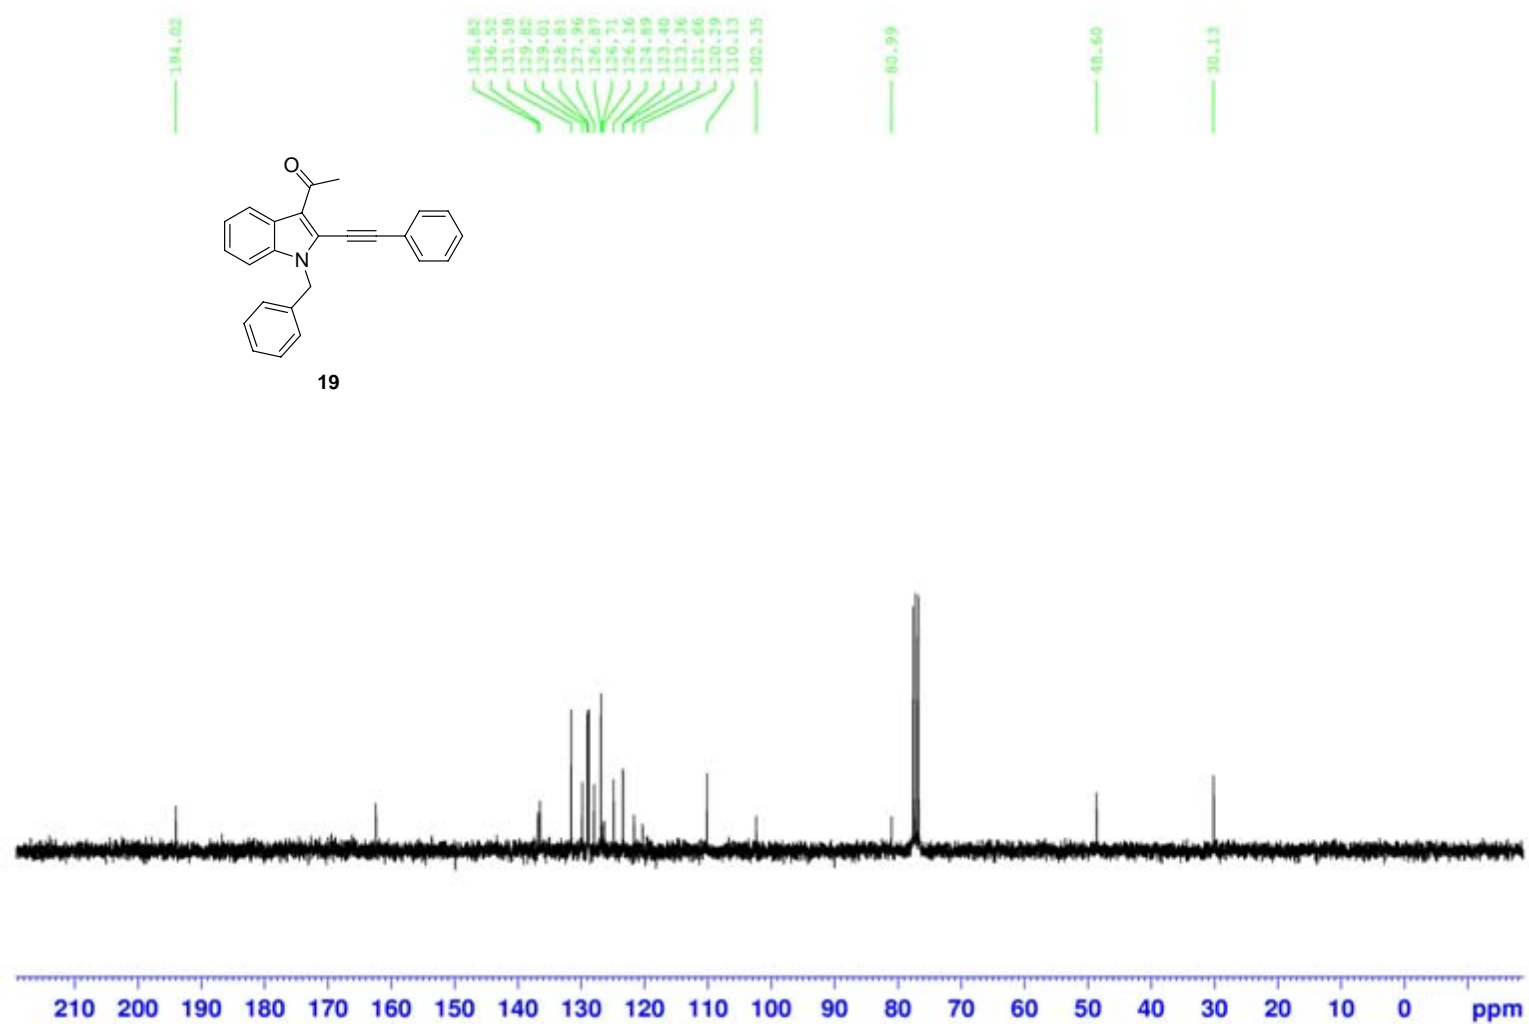

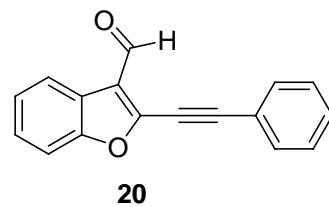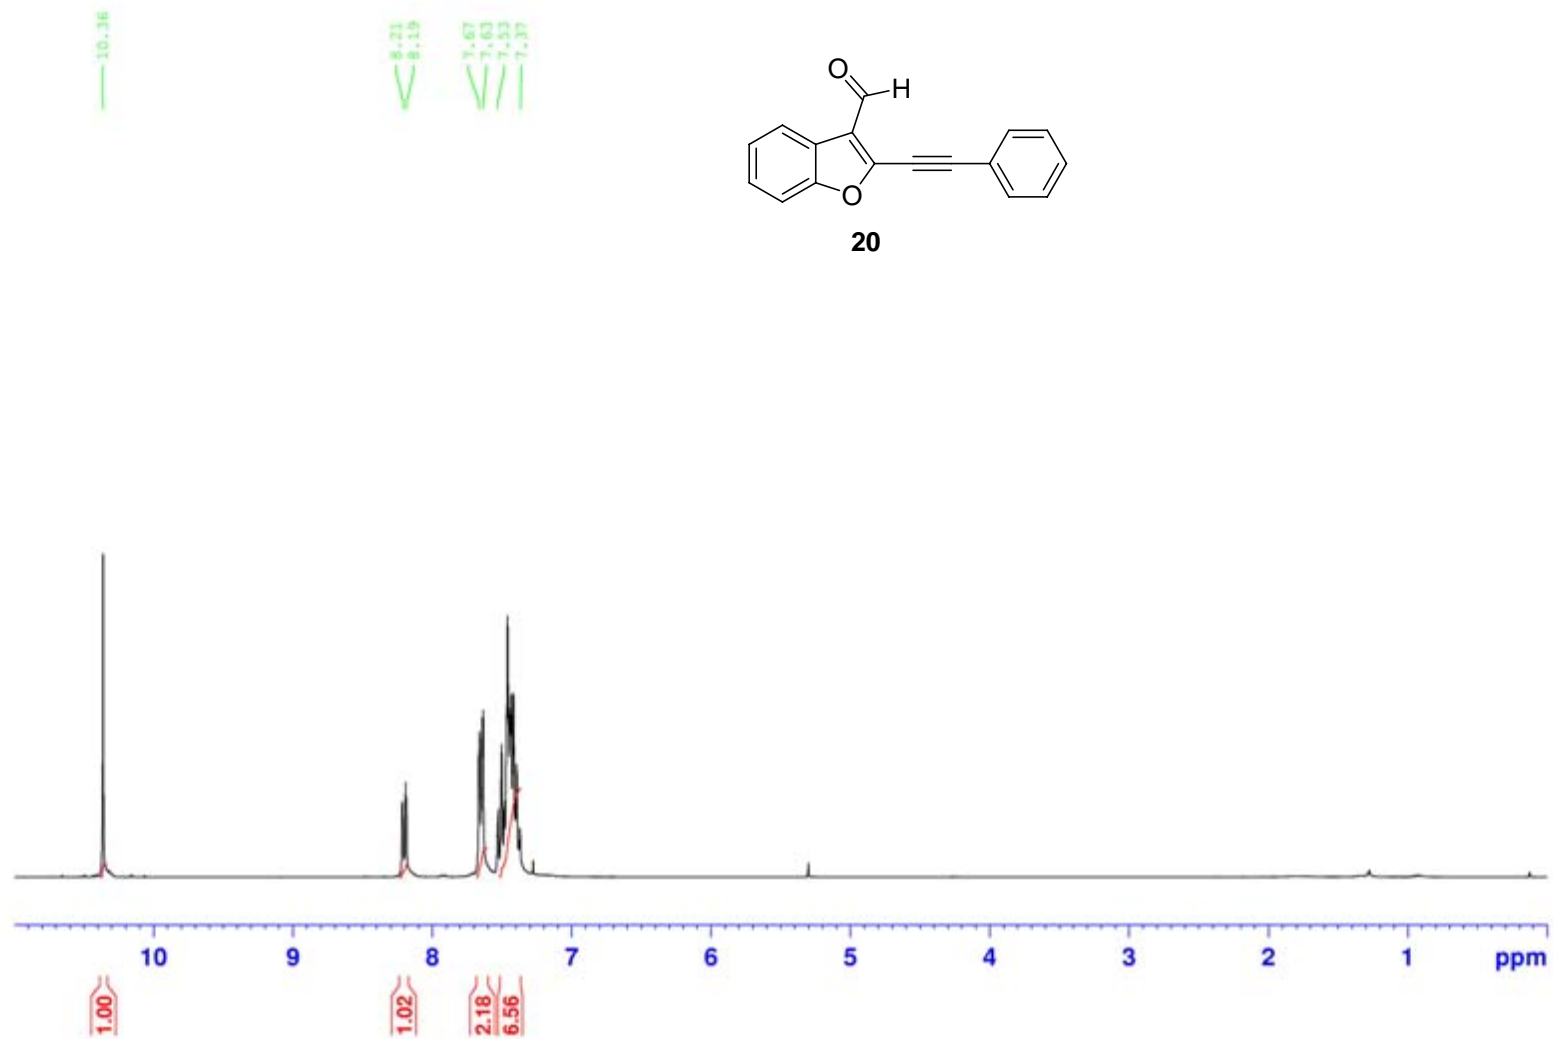

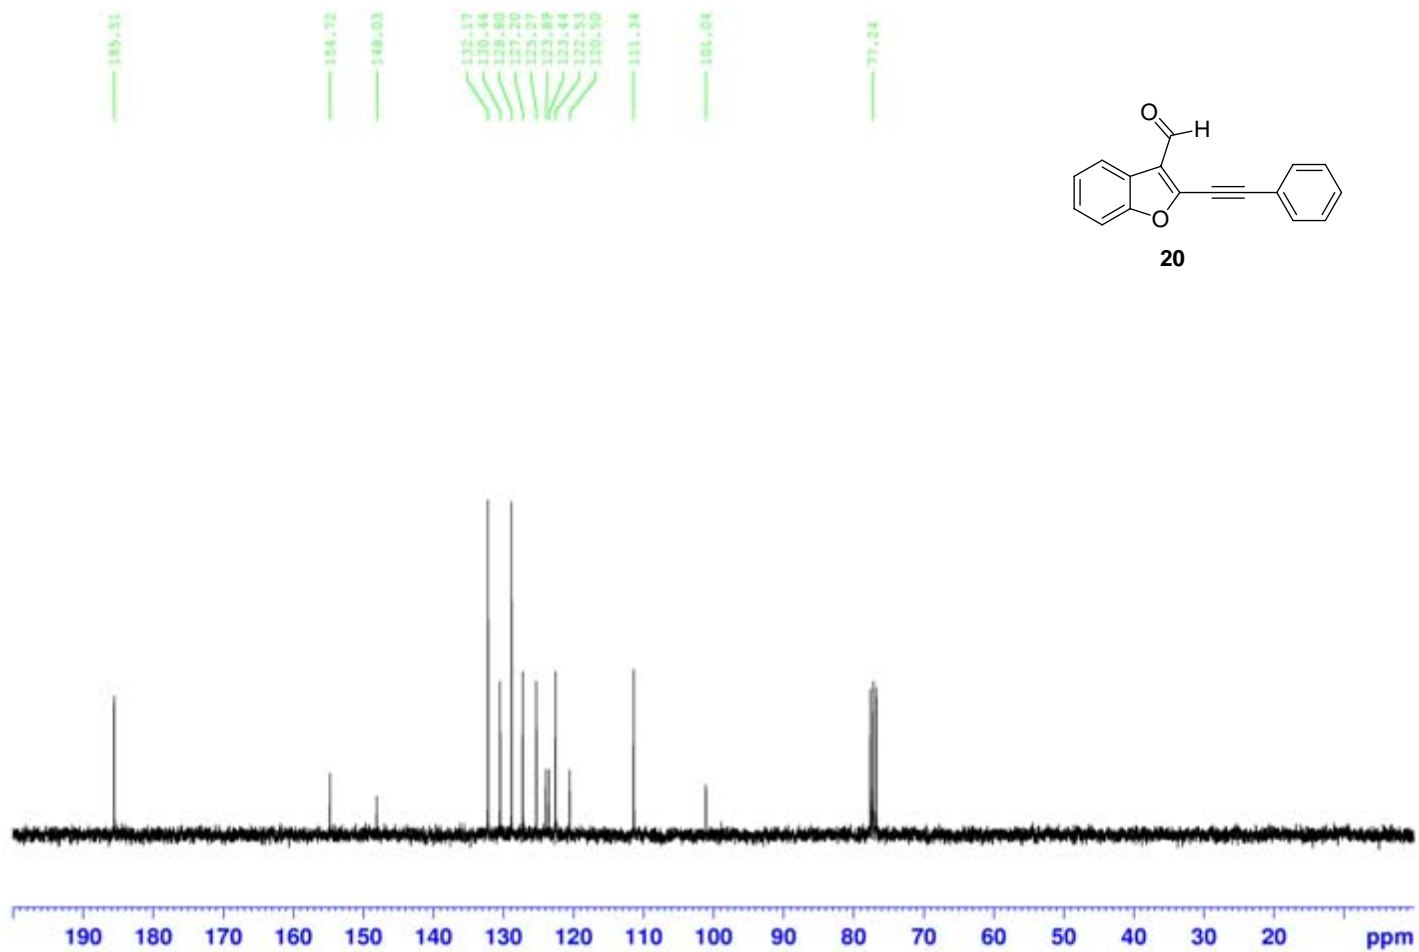



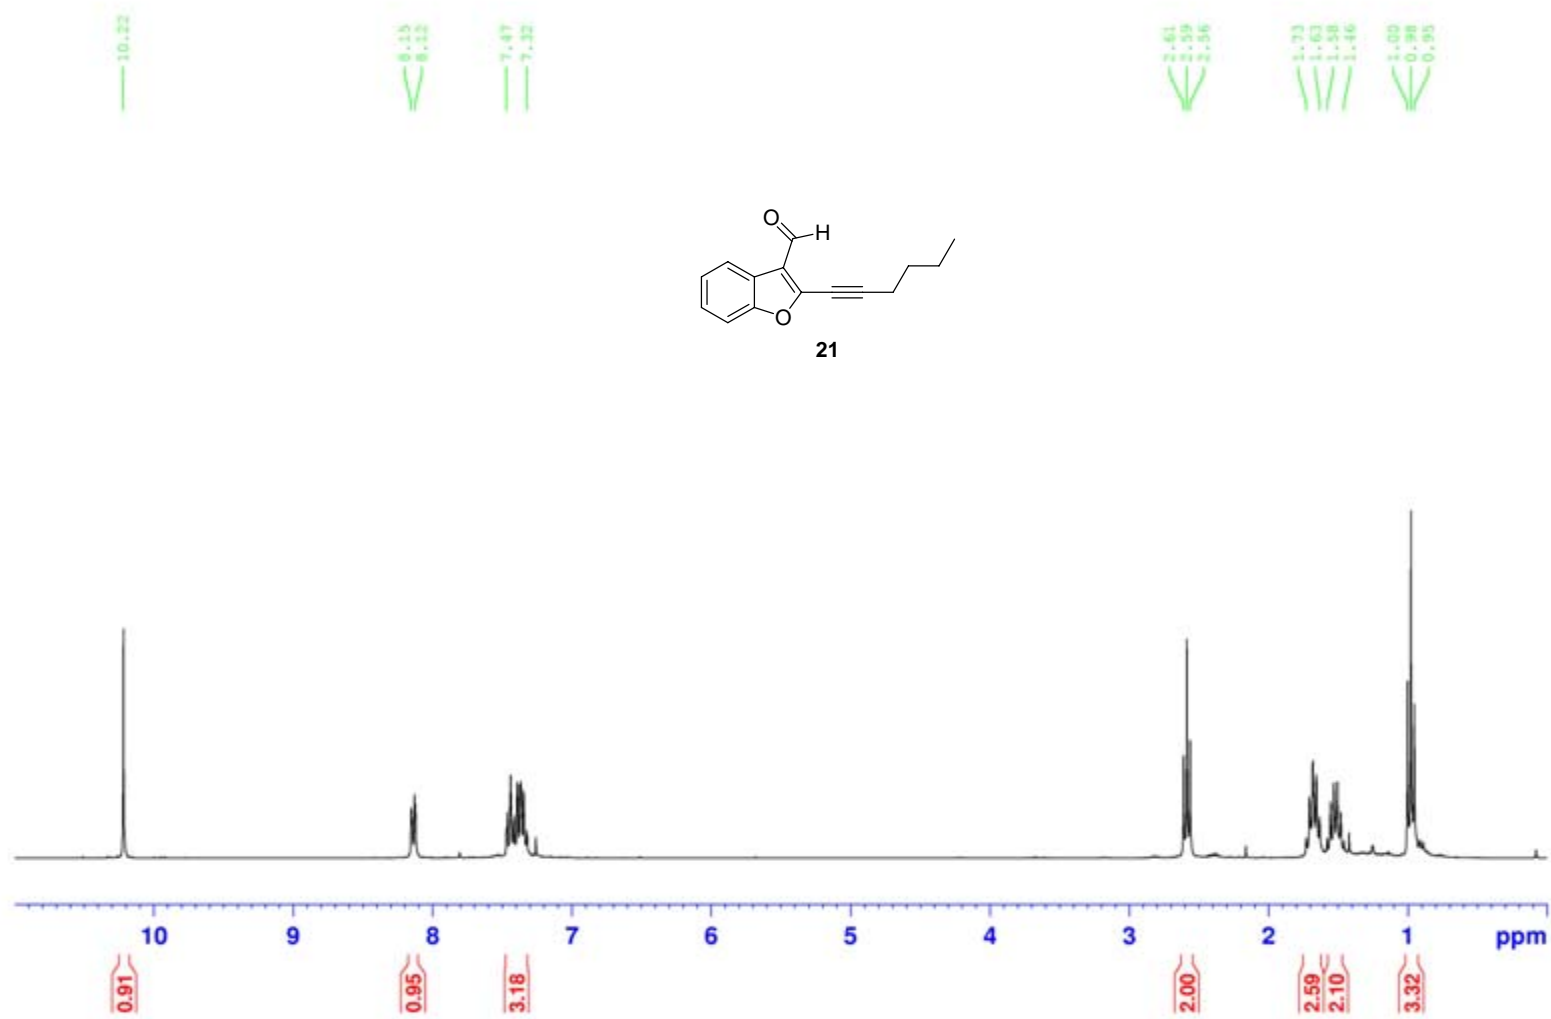

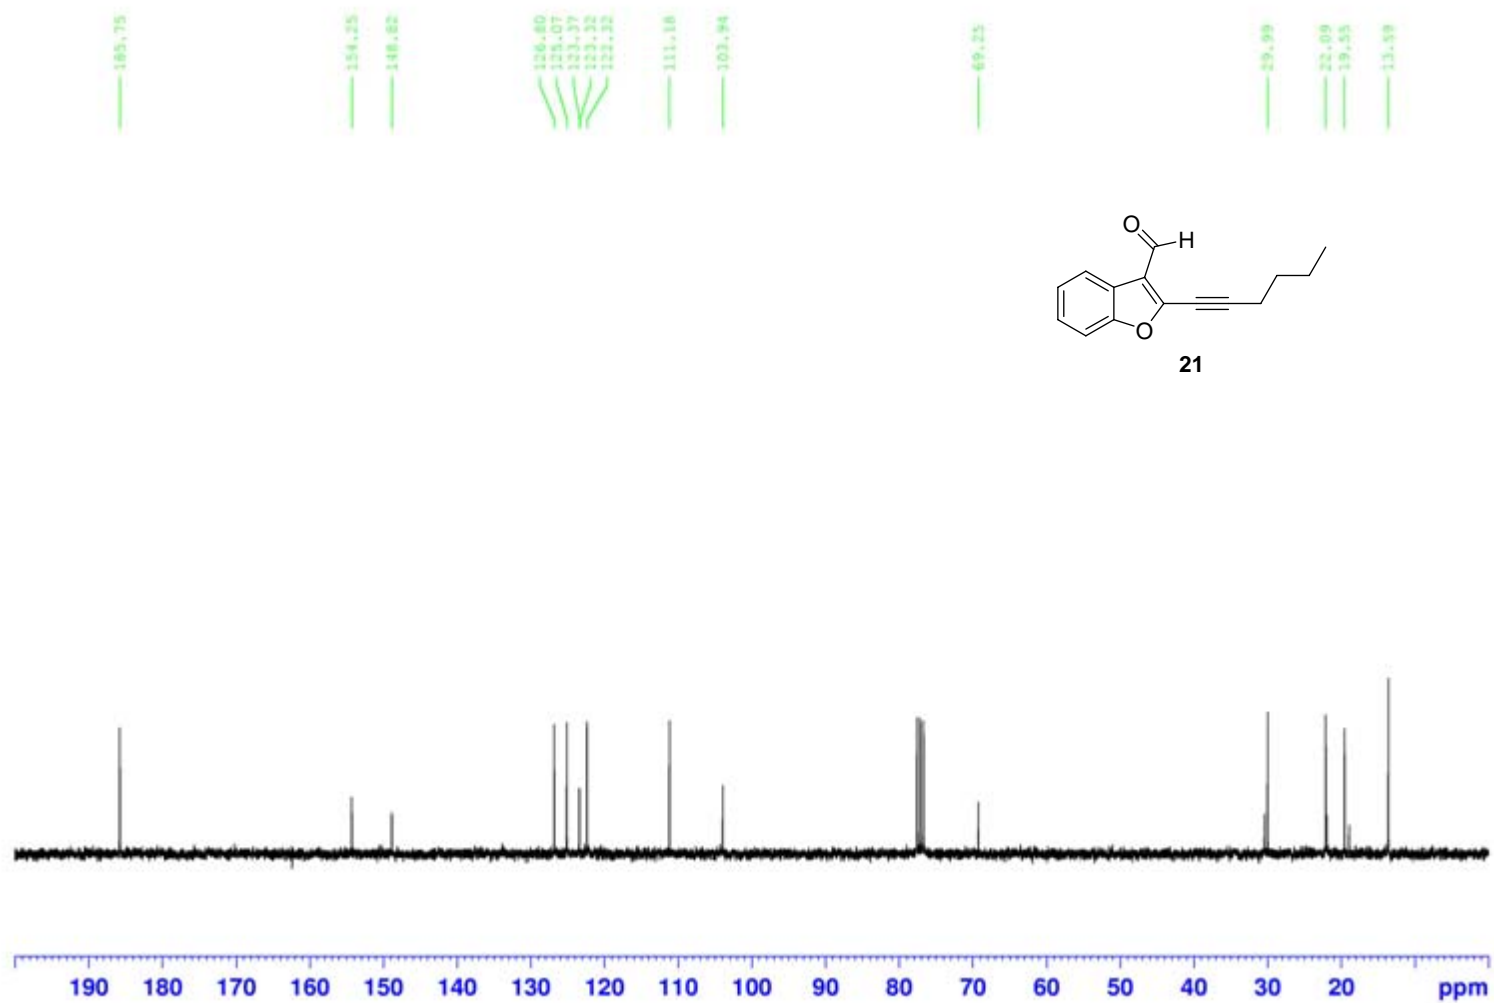

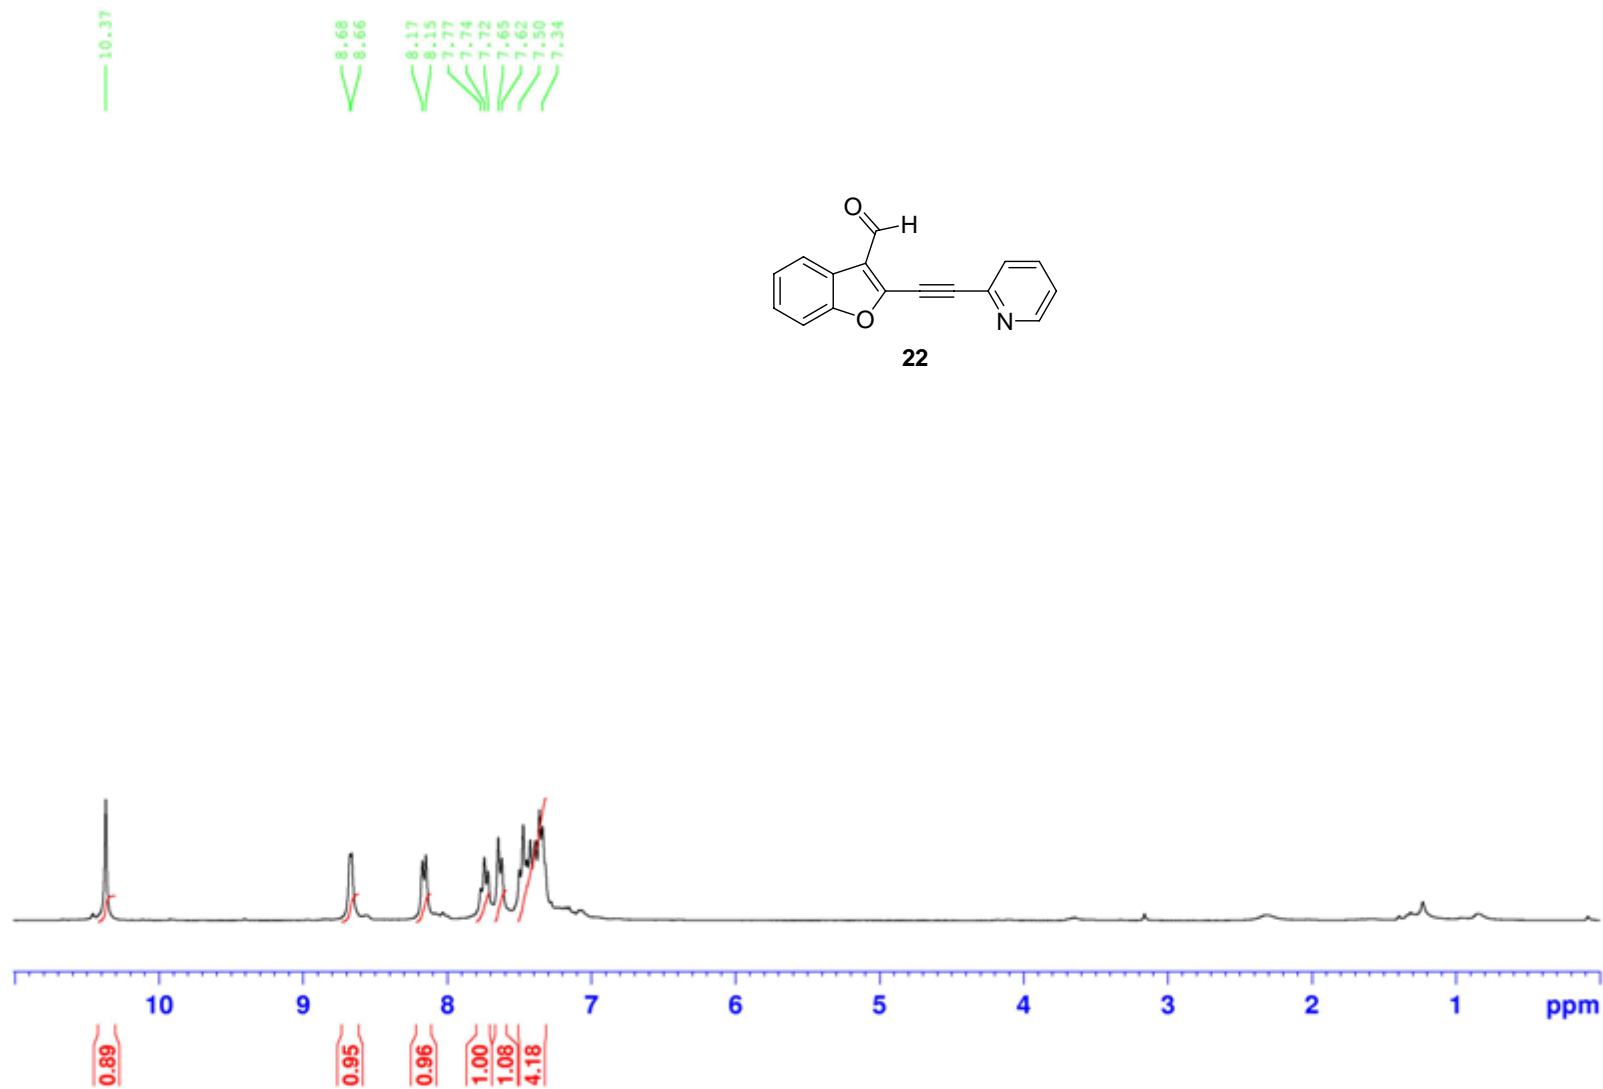

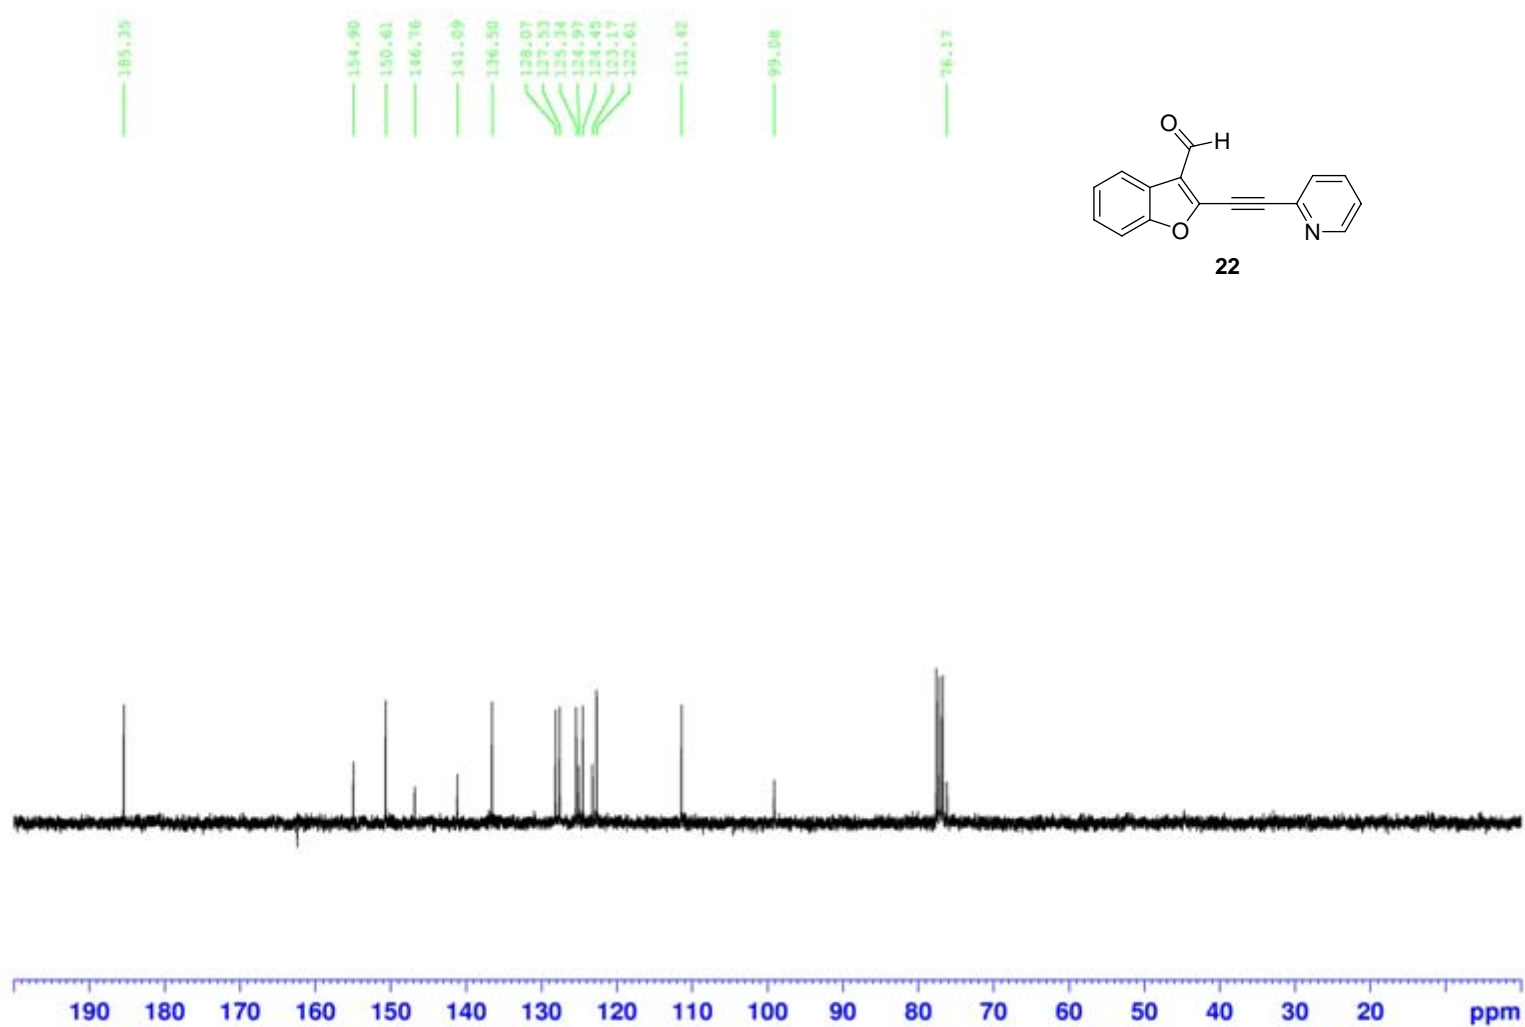

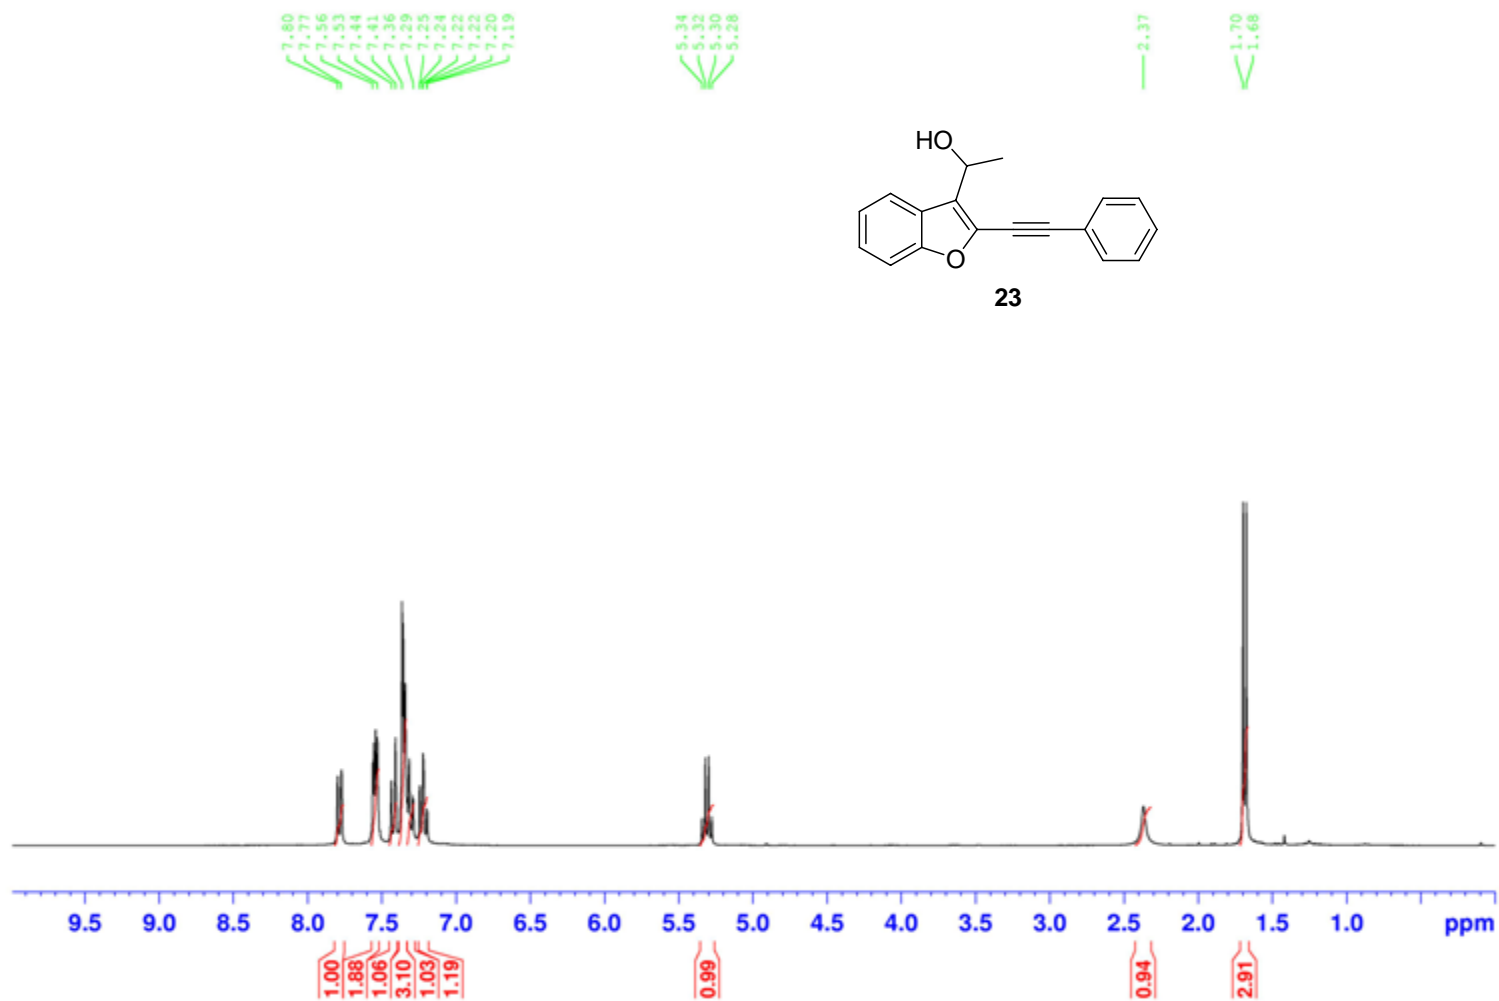

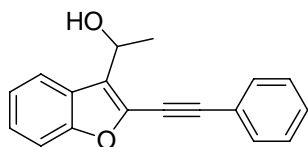

23

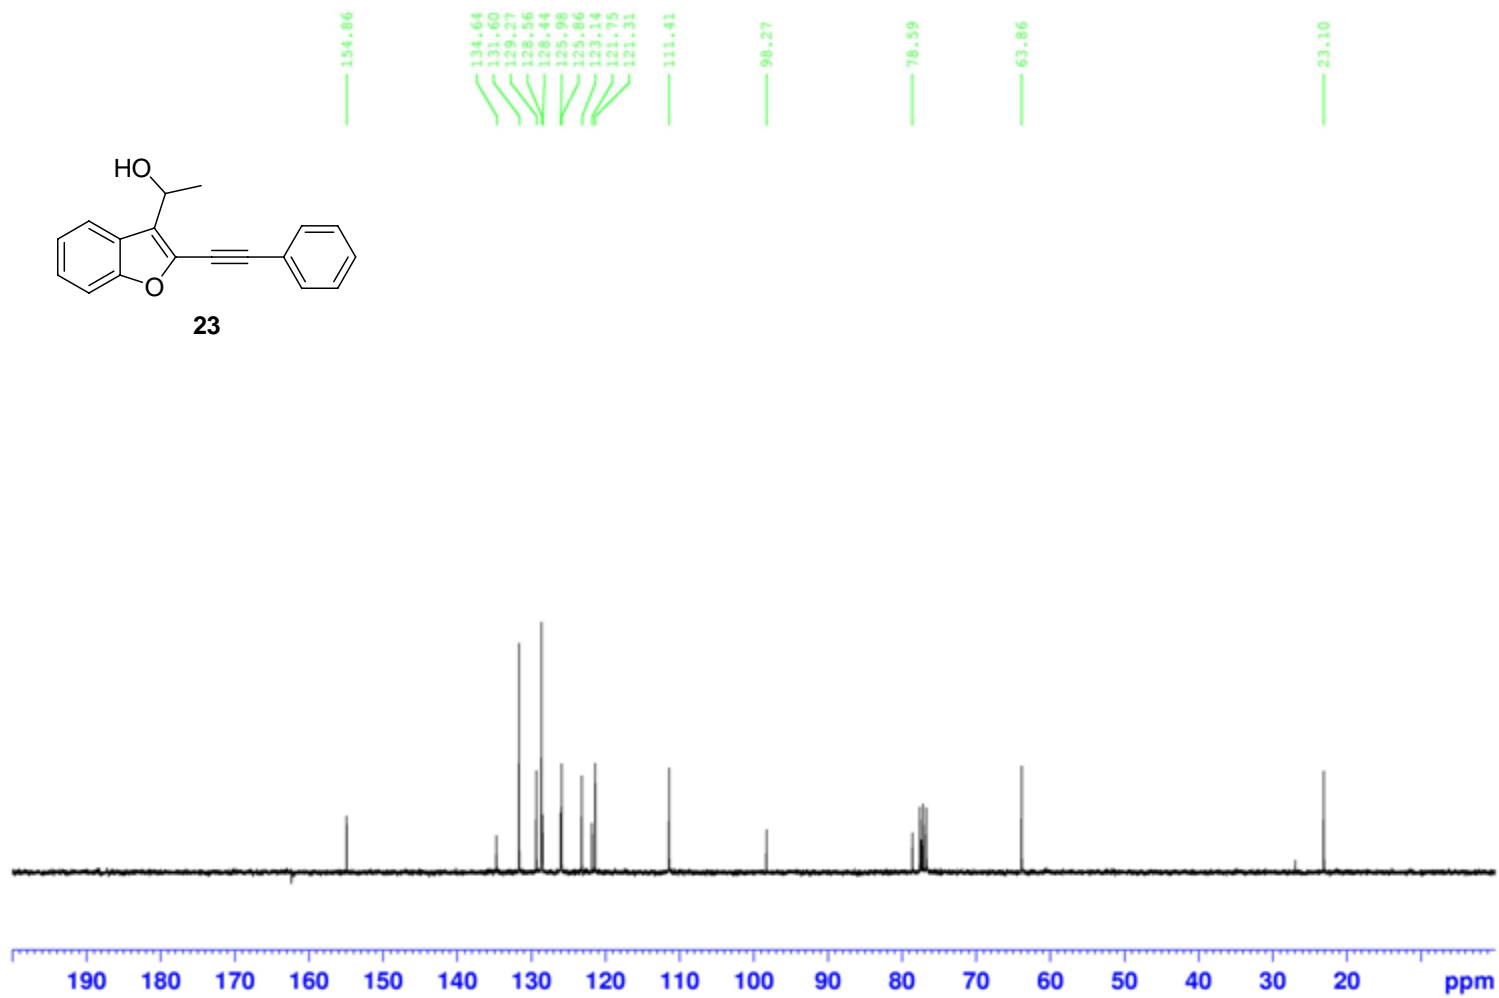

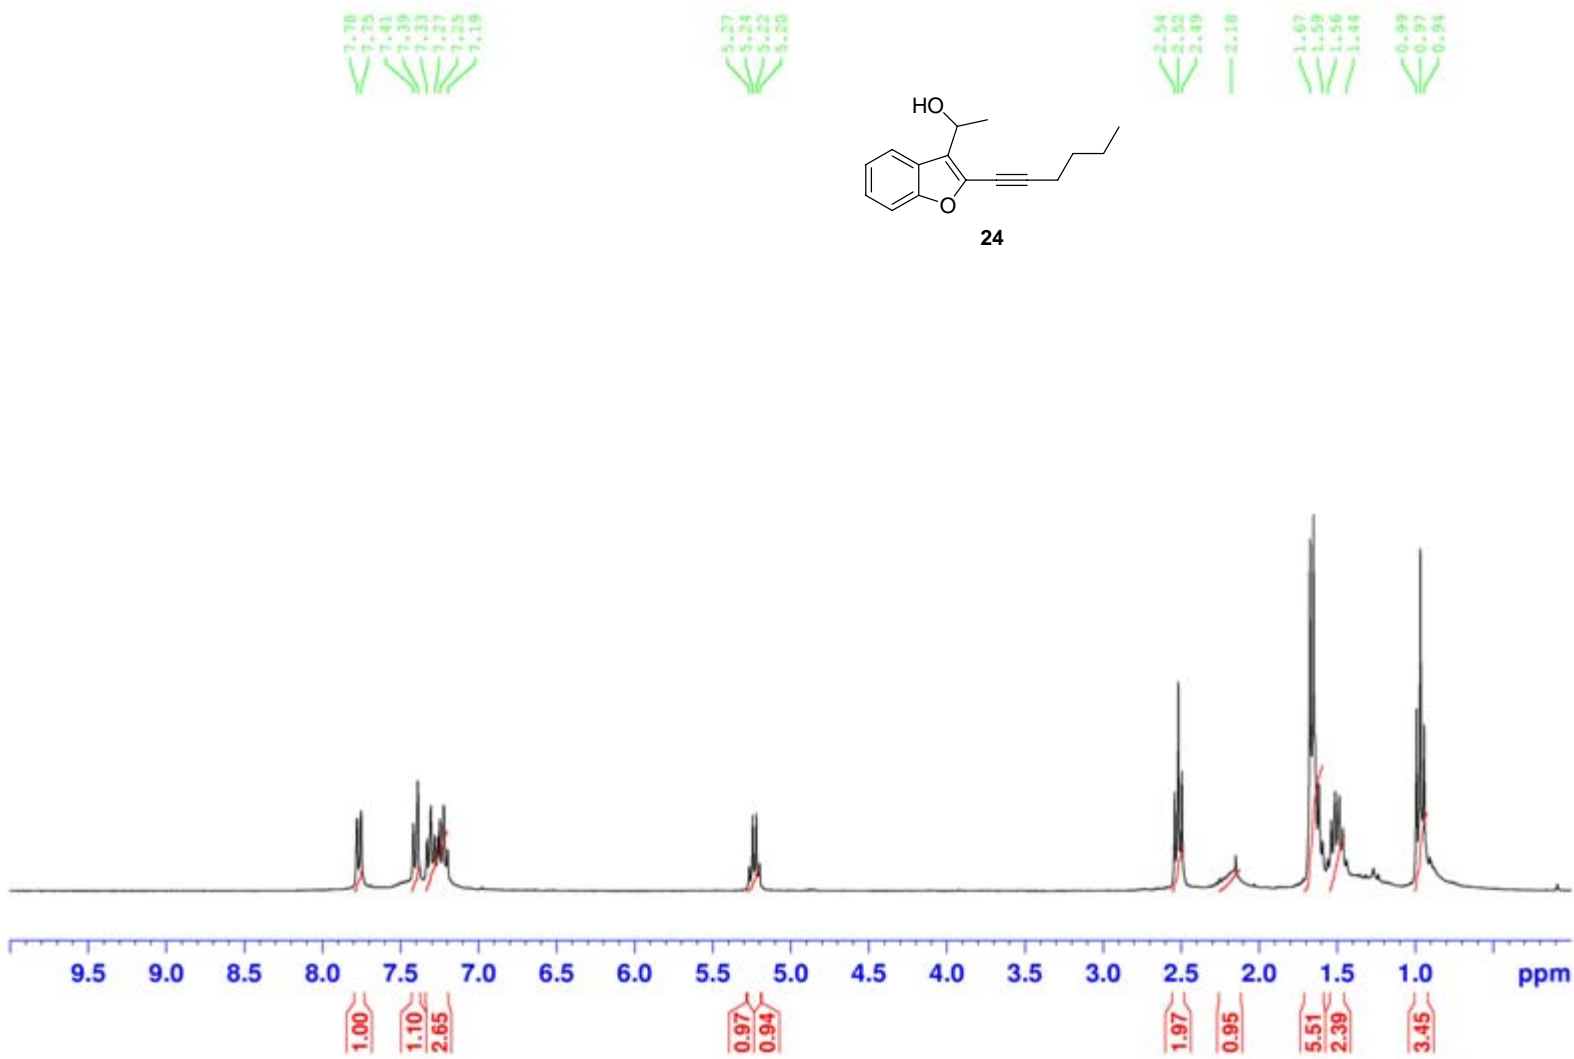

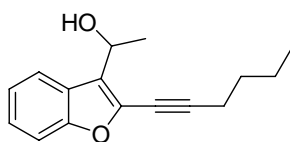

24

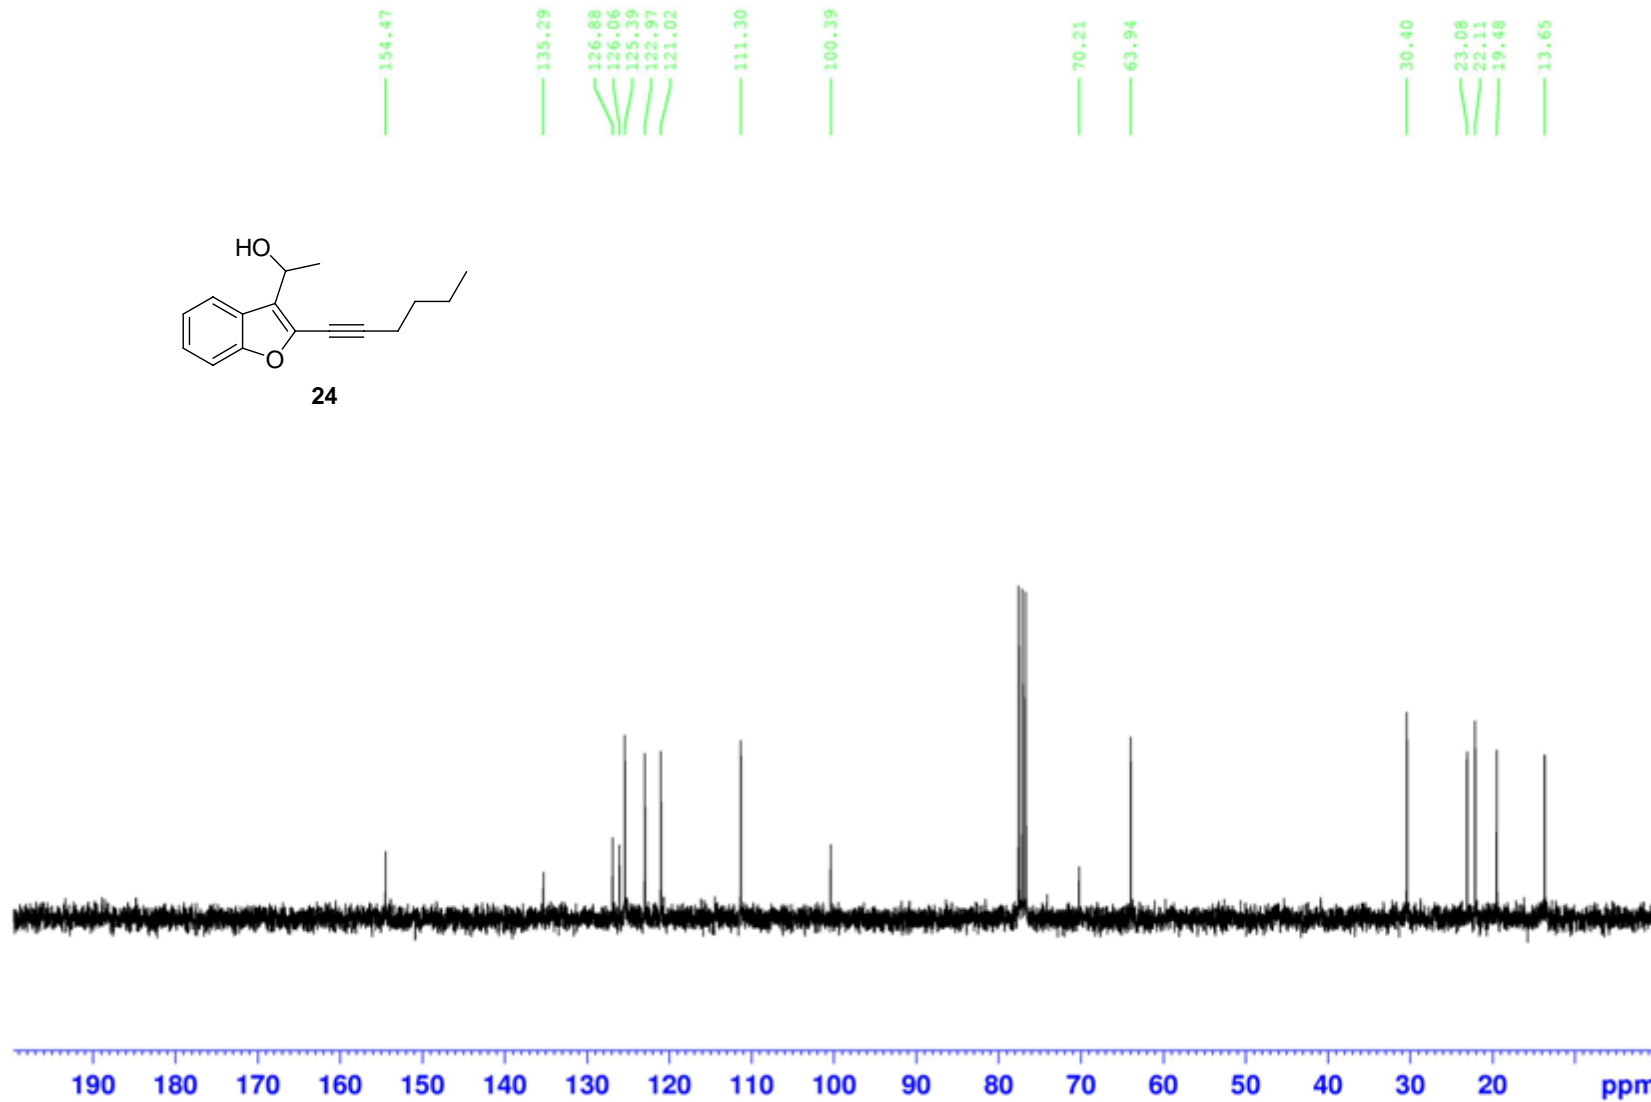



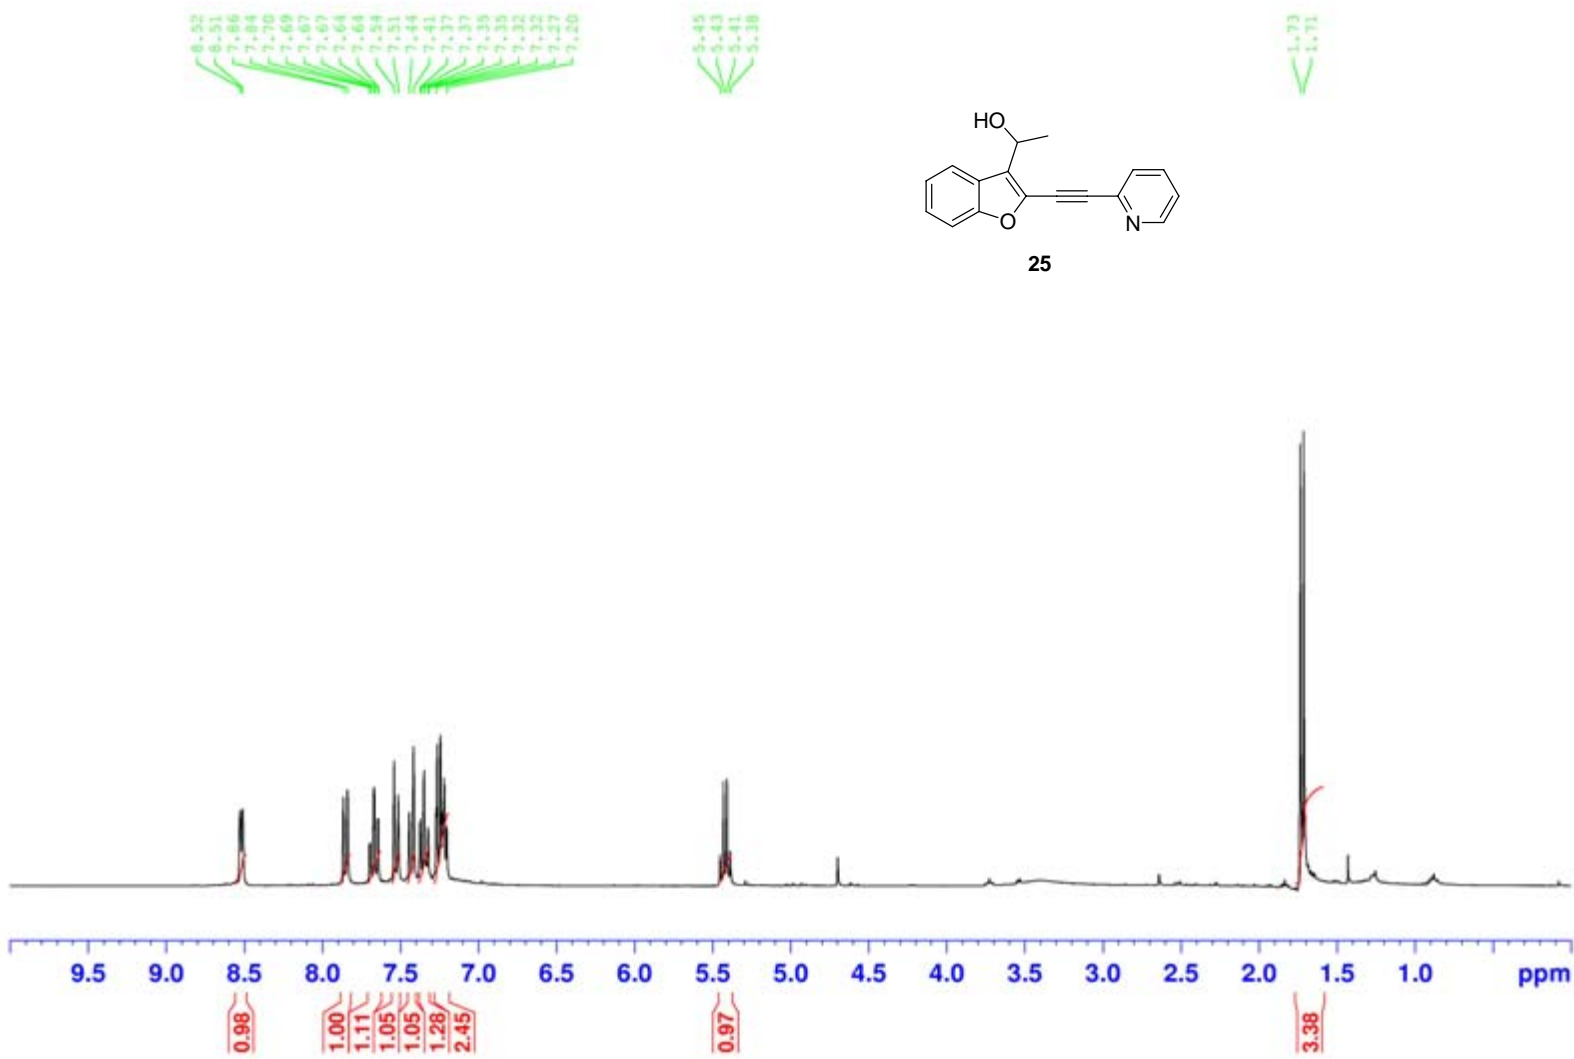

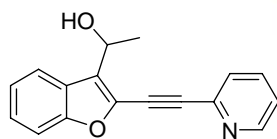

25

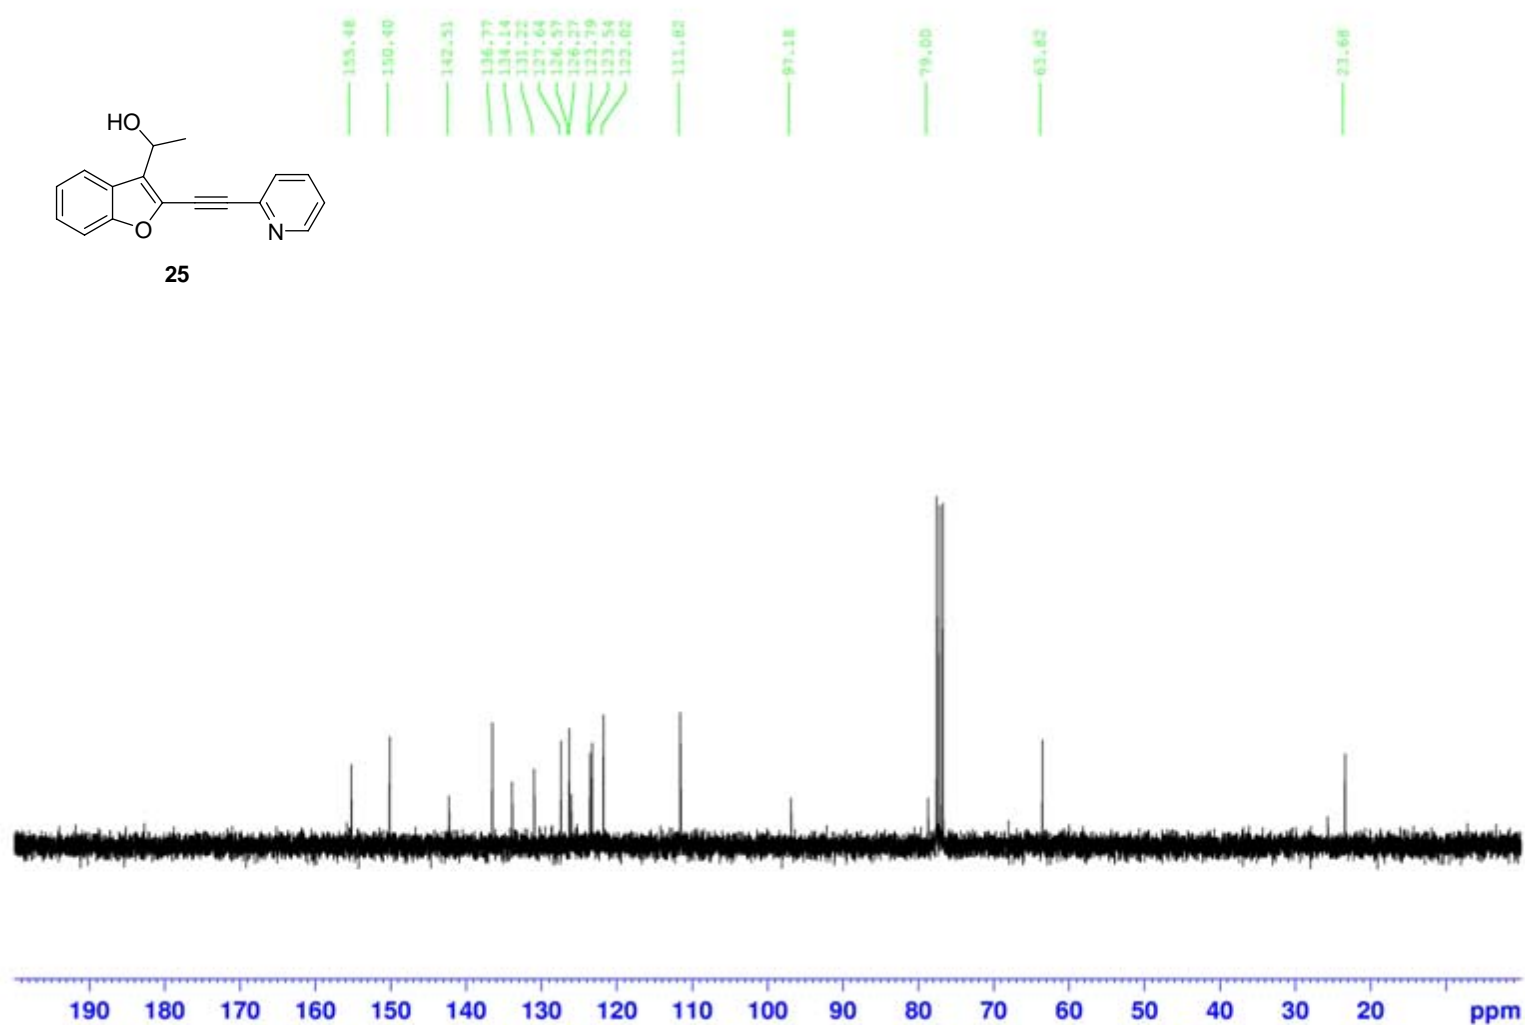

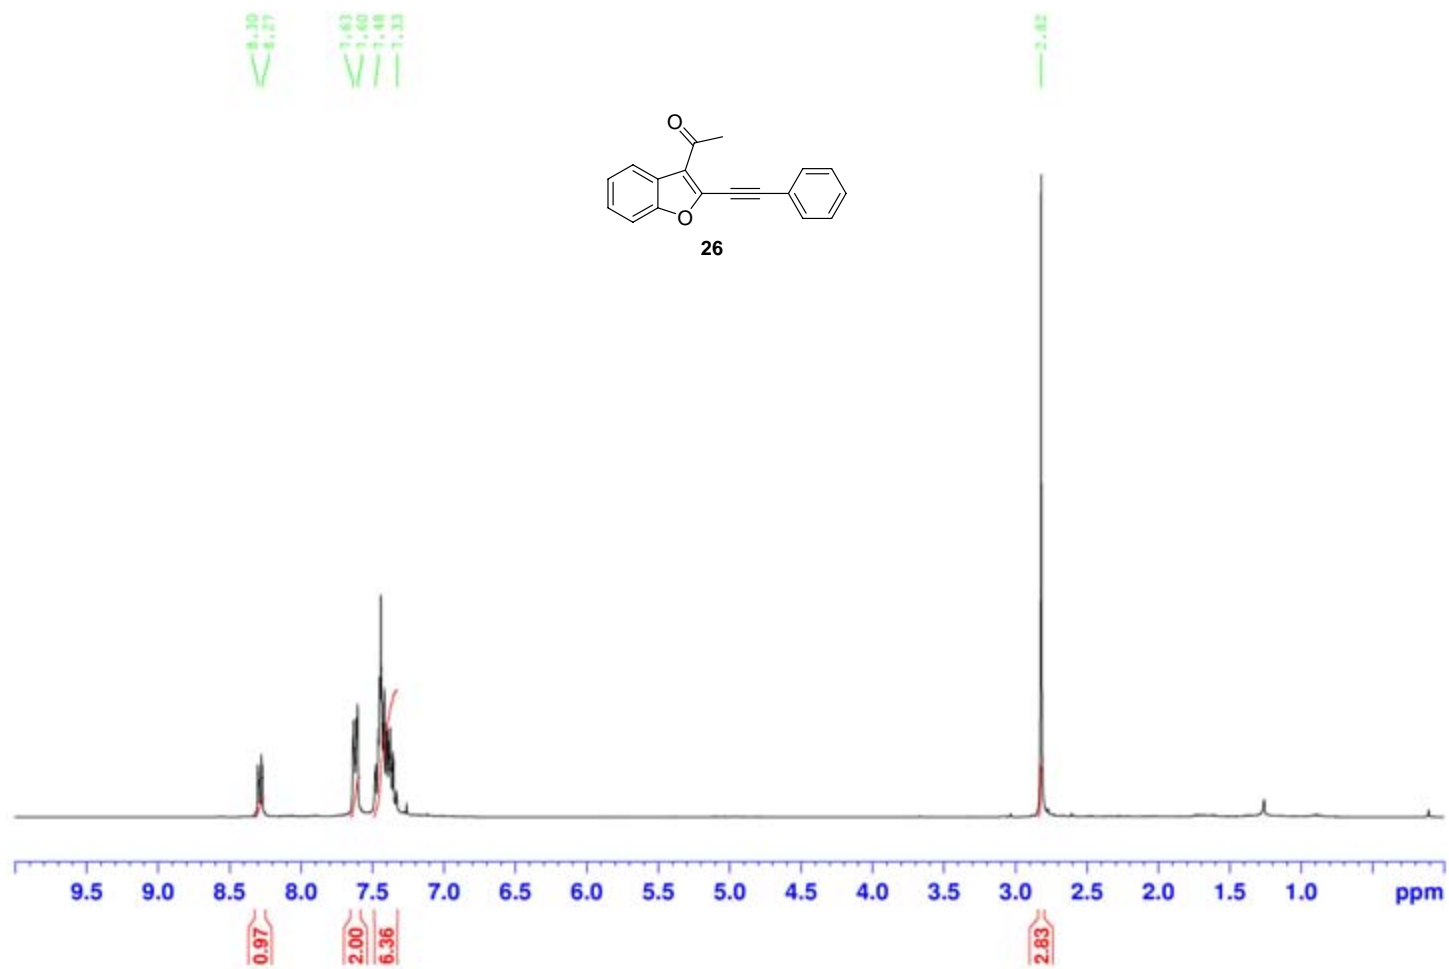

S43

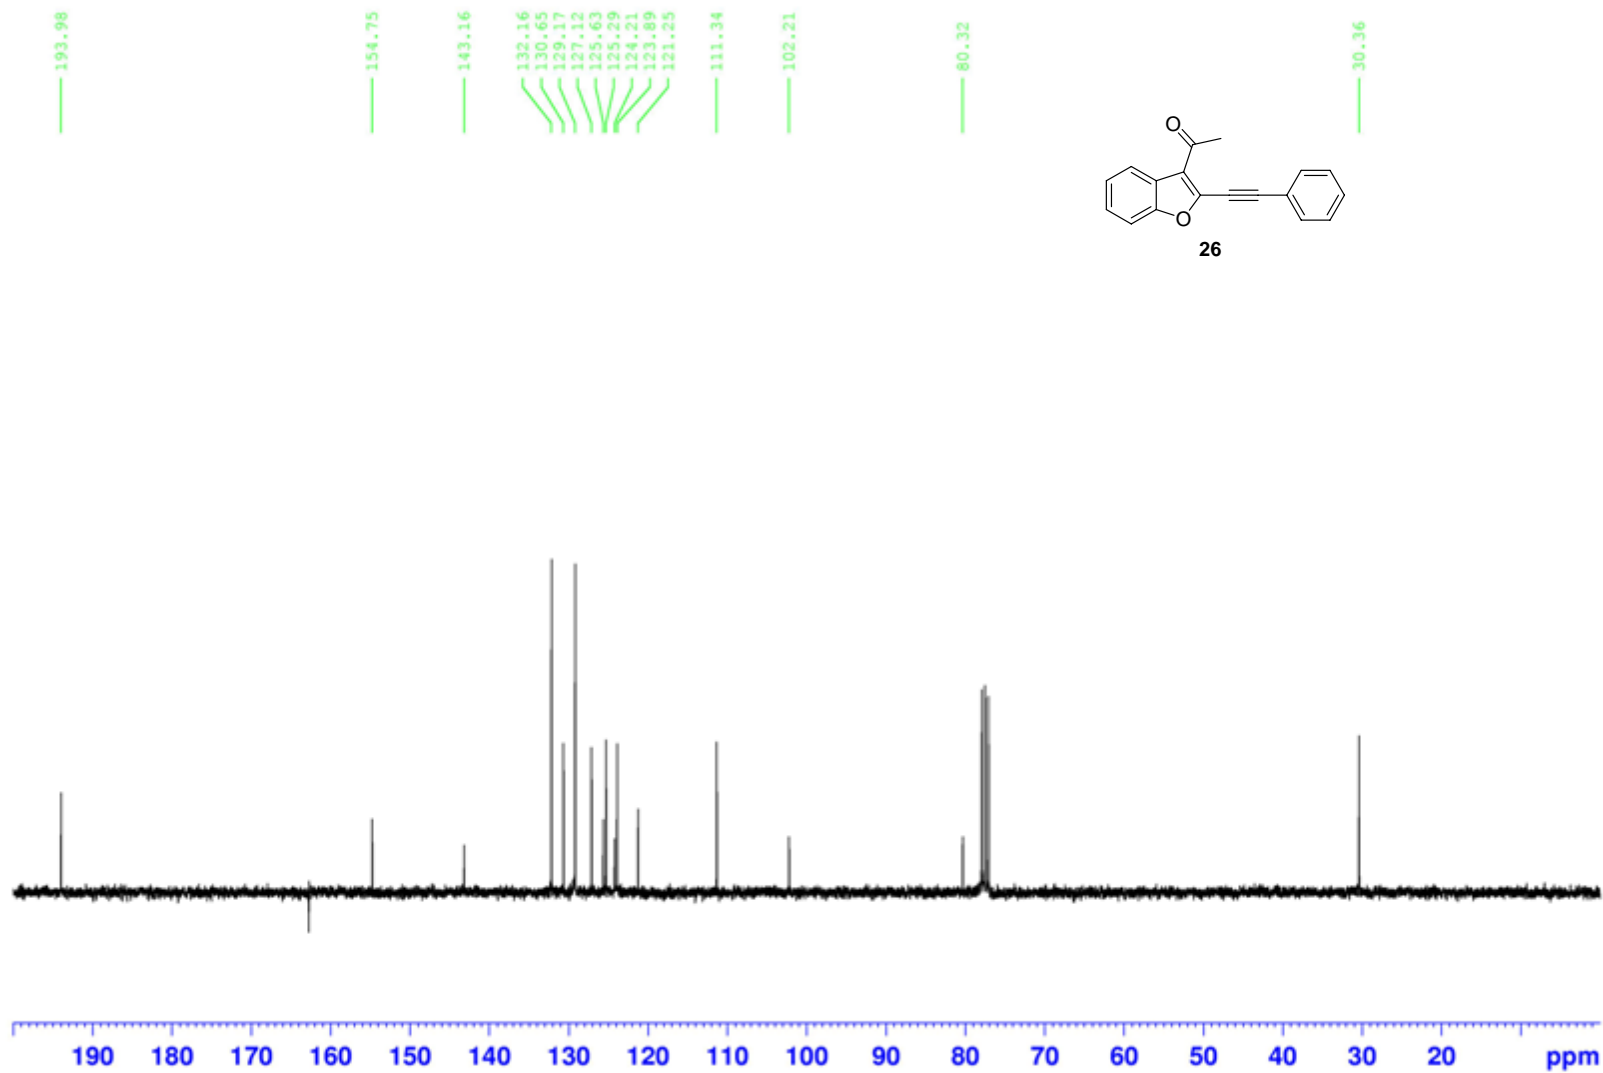

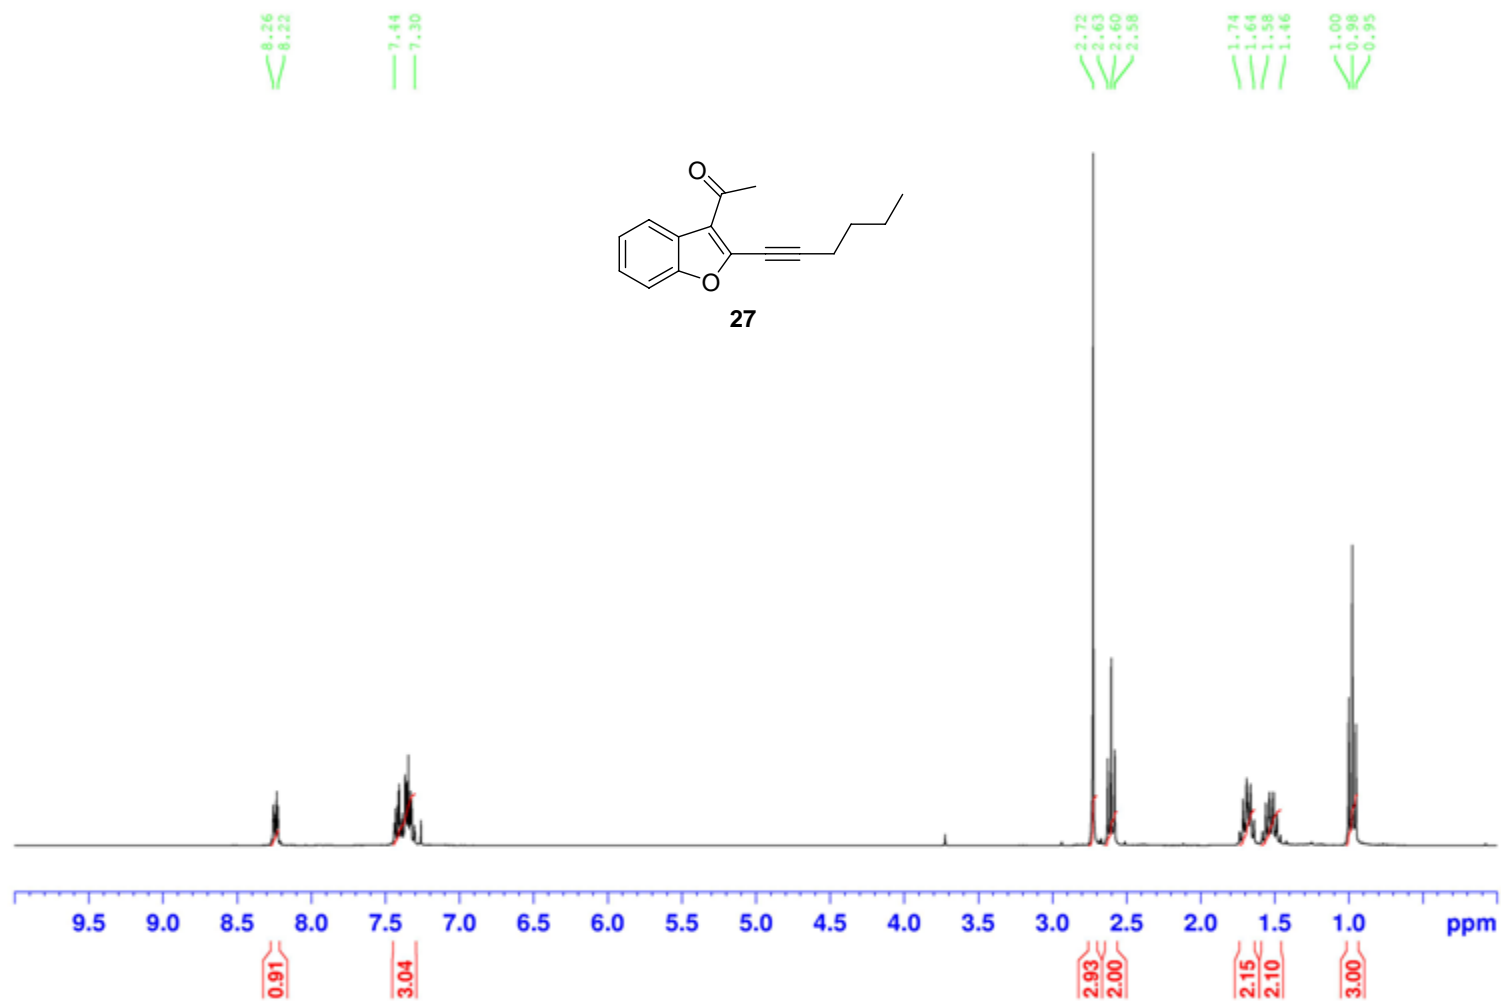

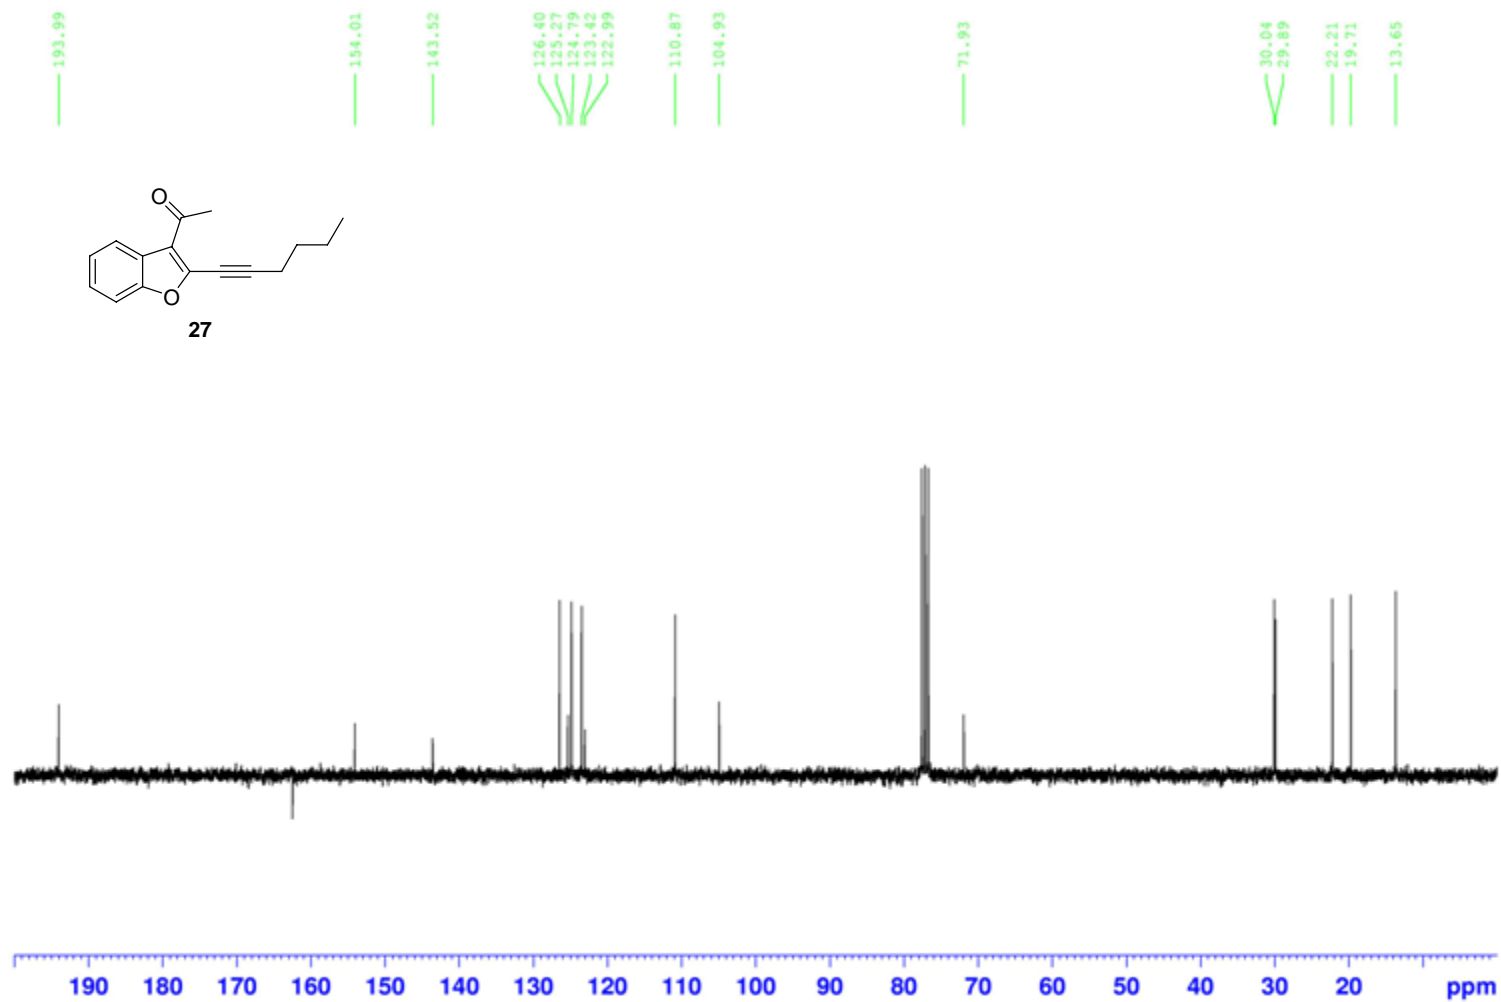

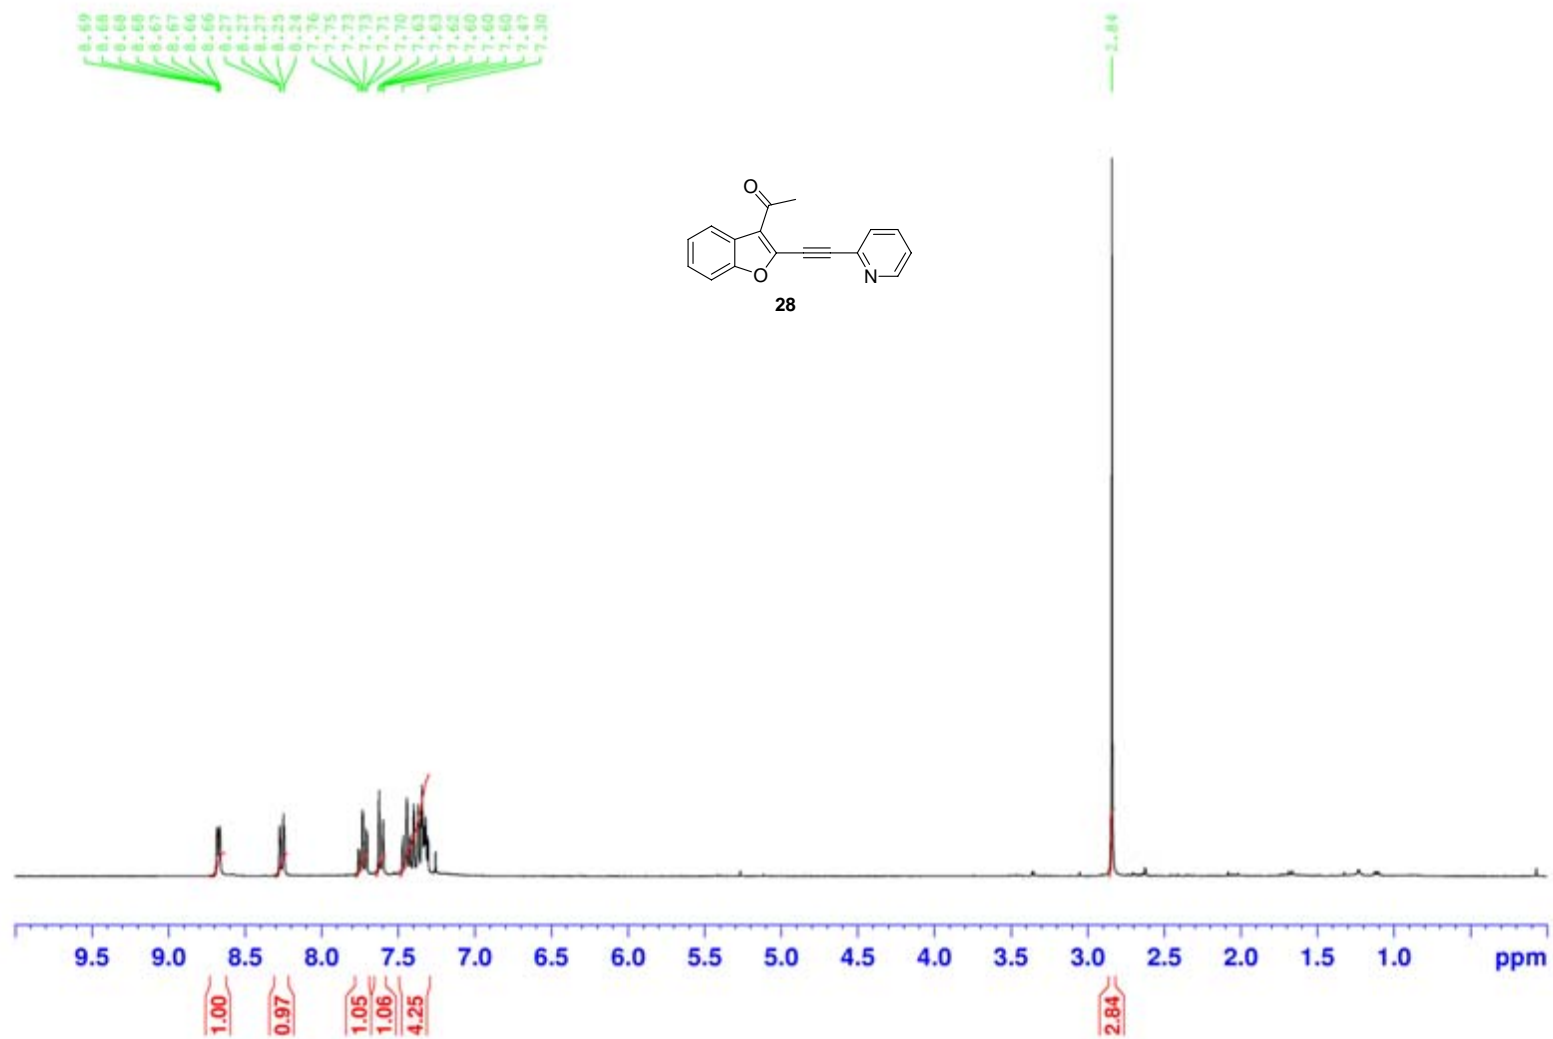

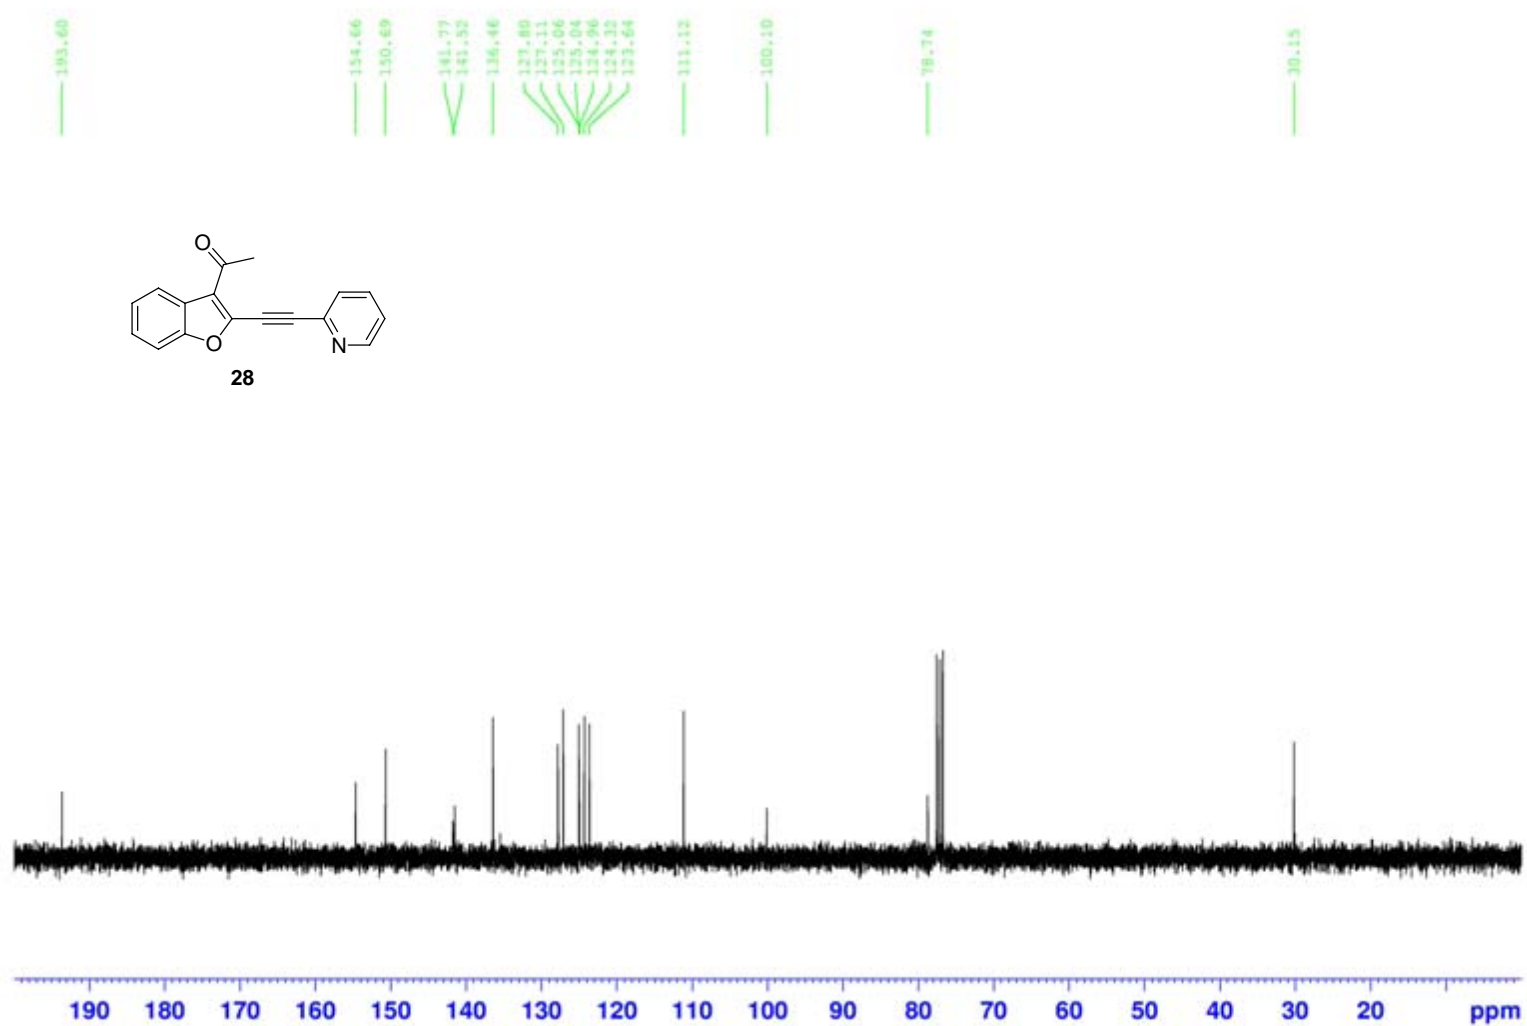



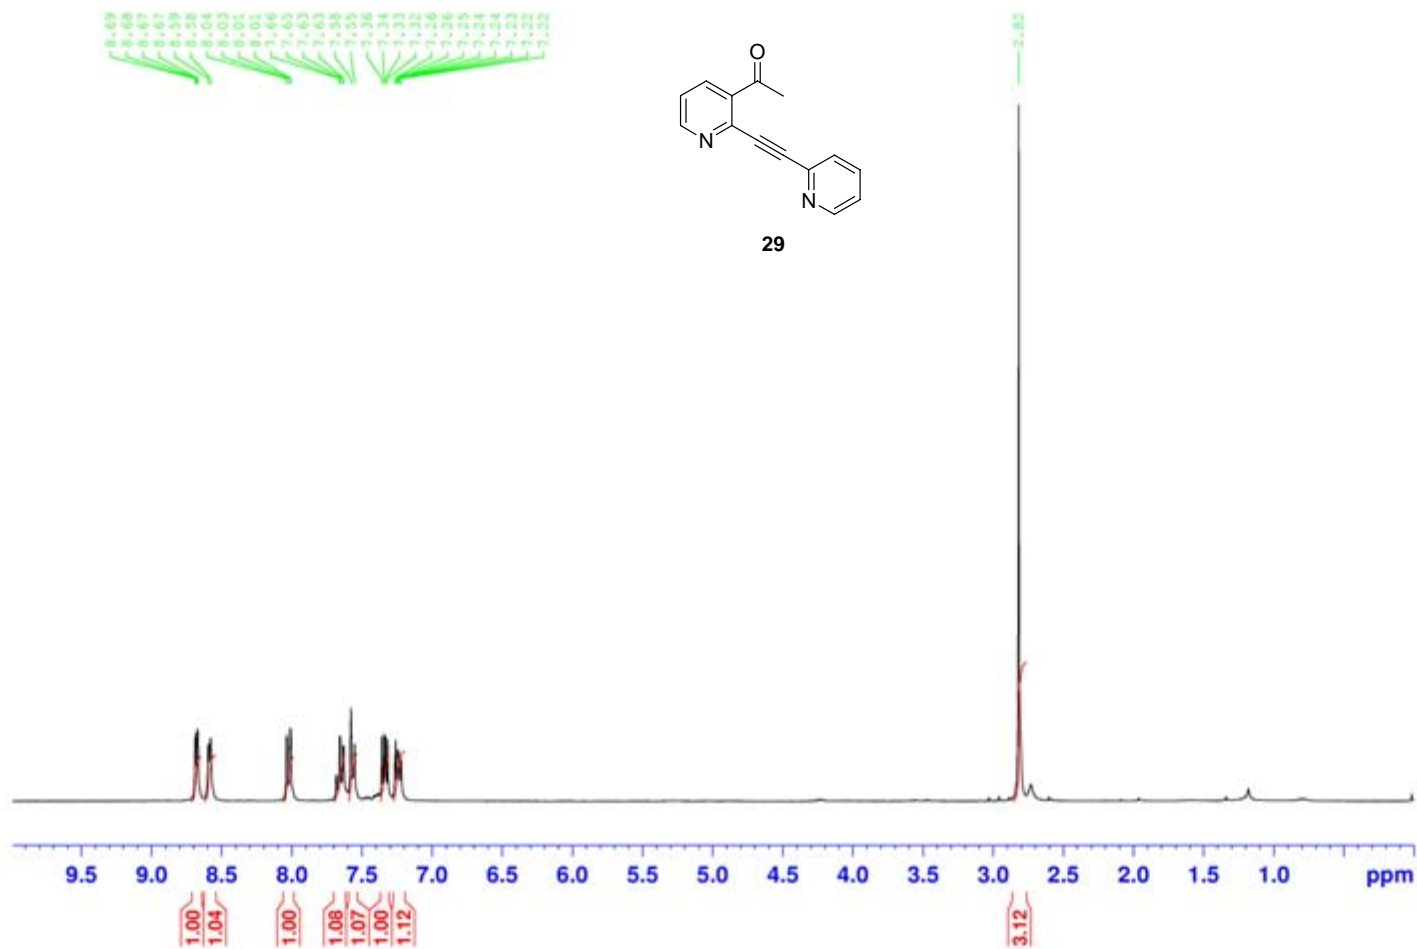

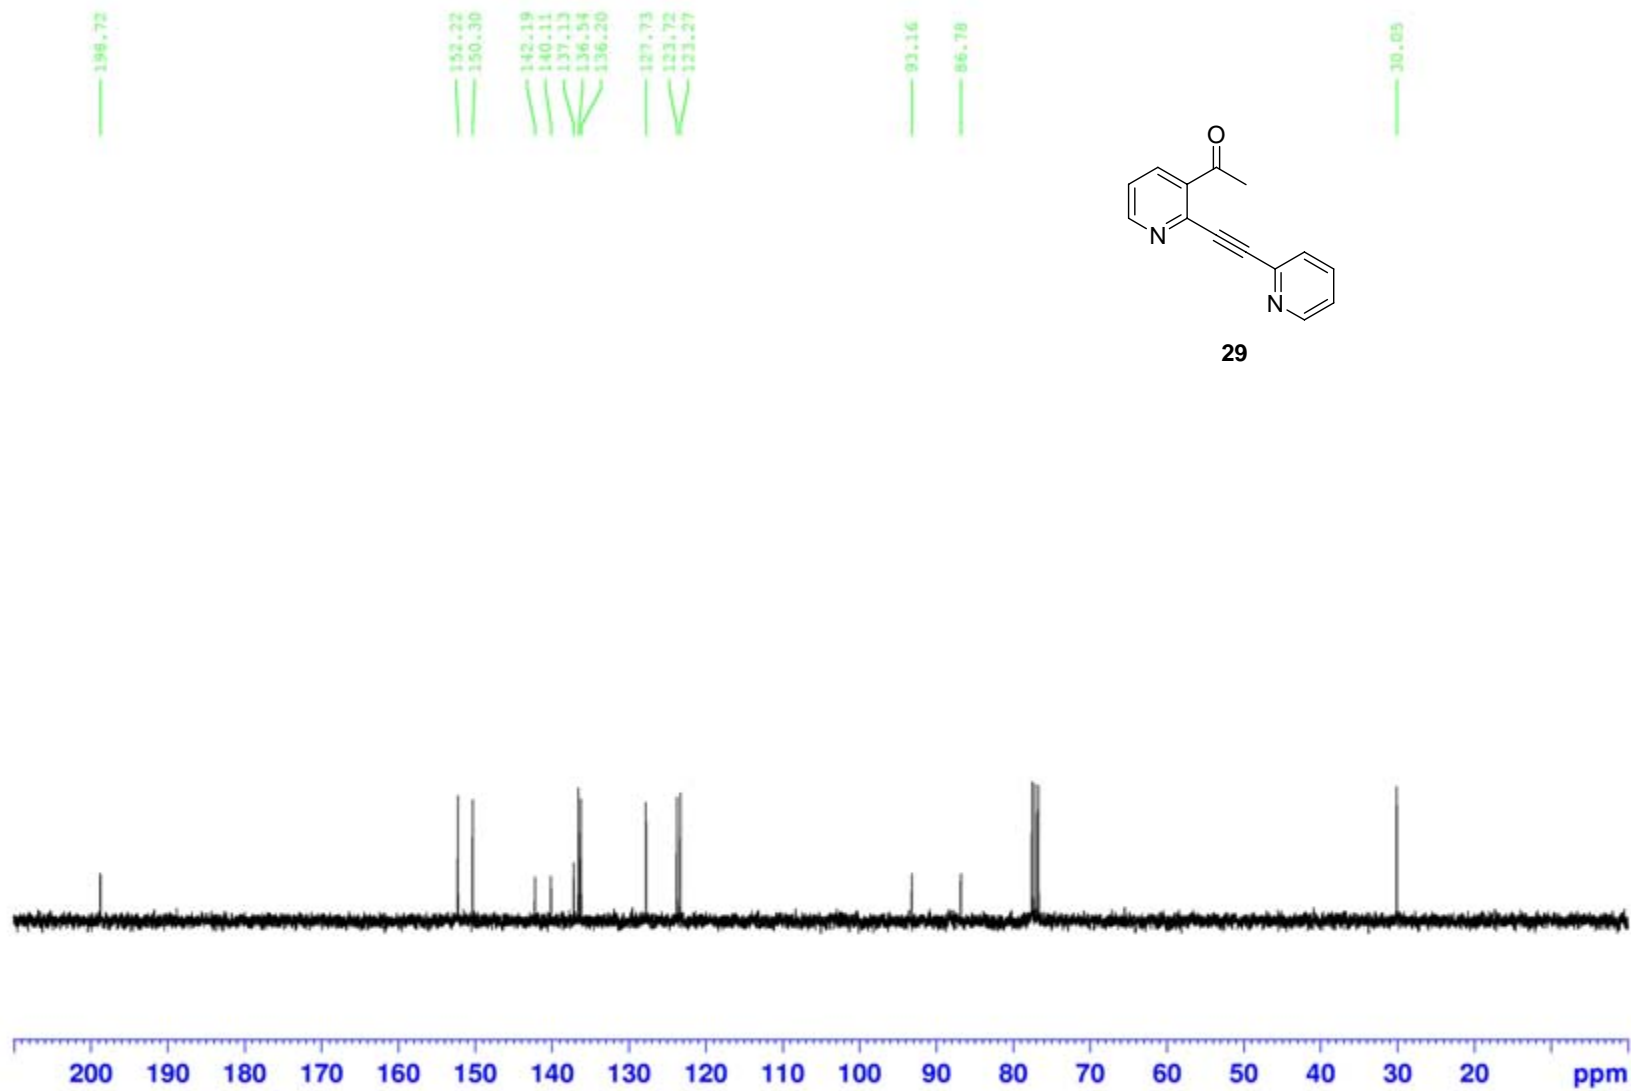

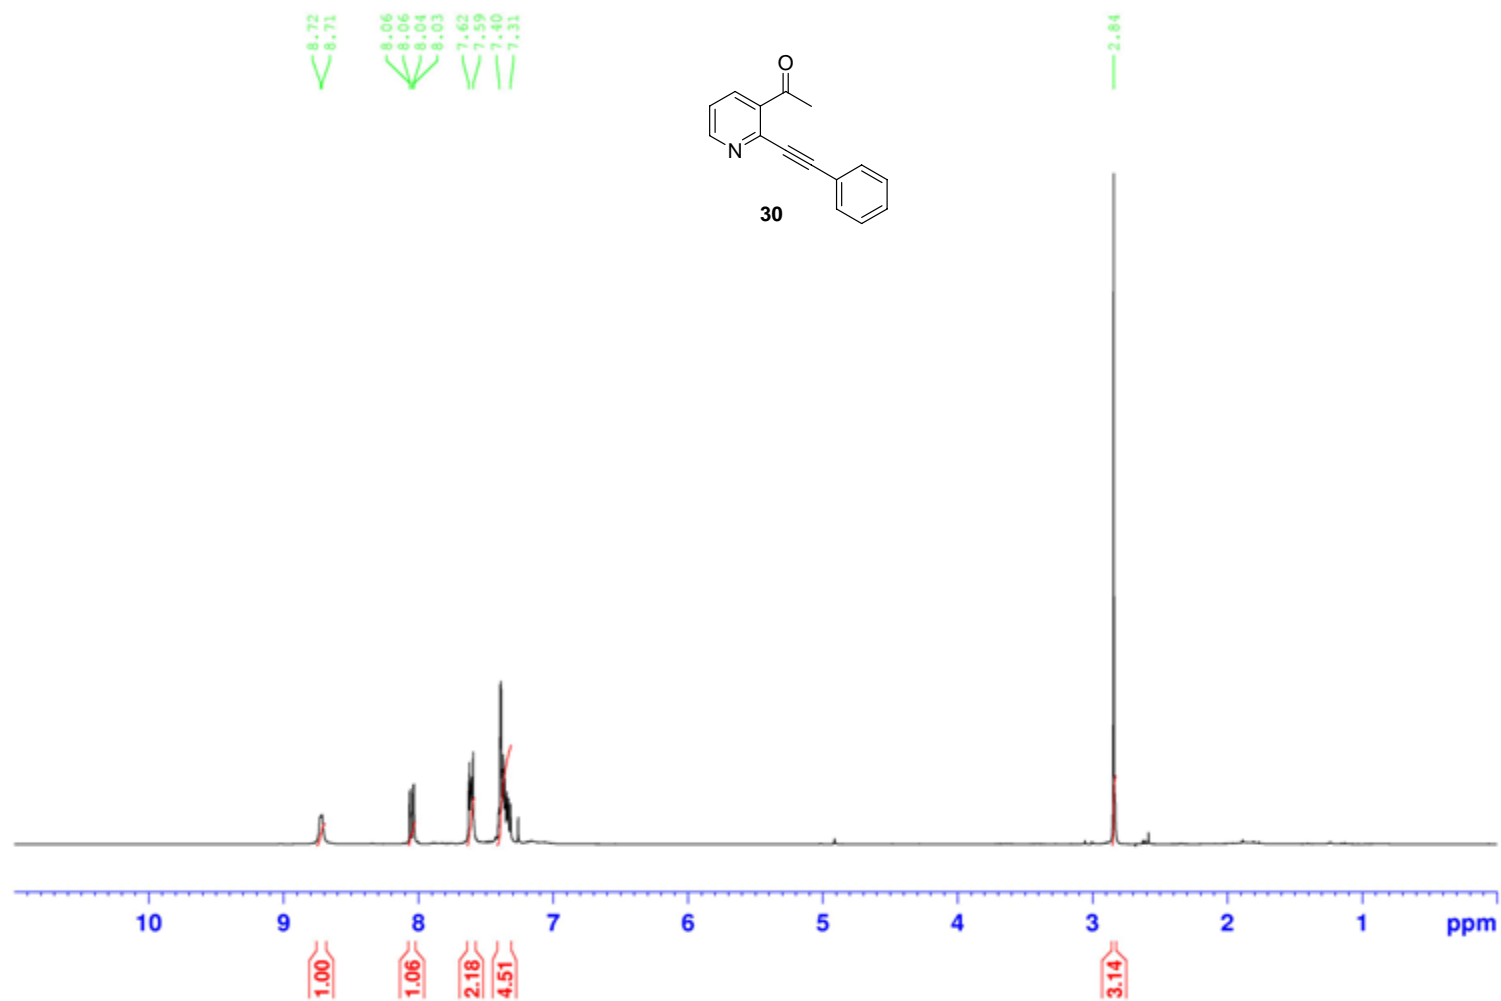

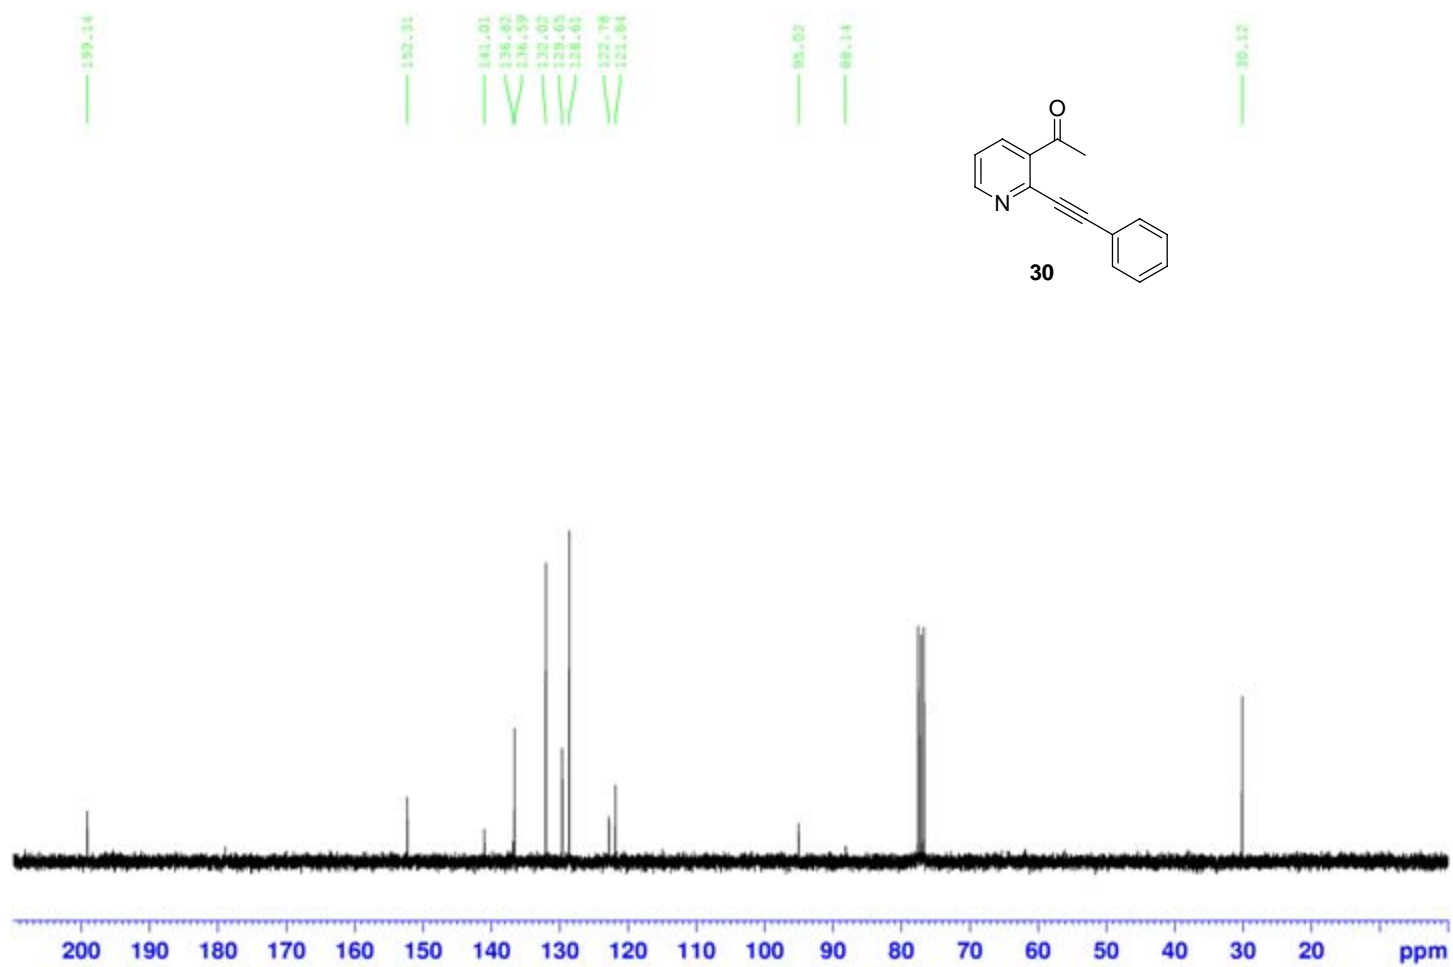

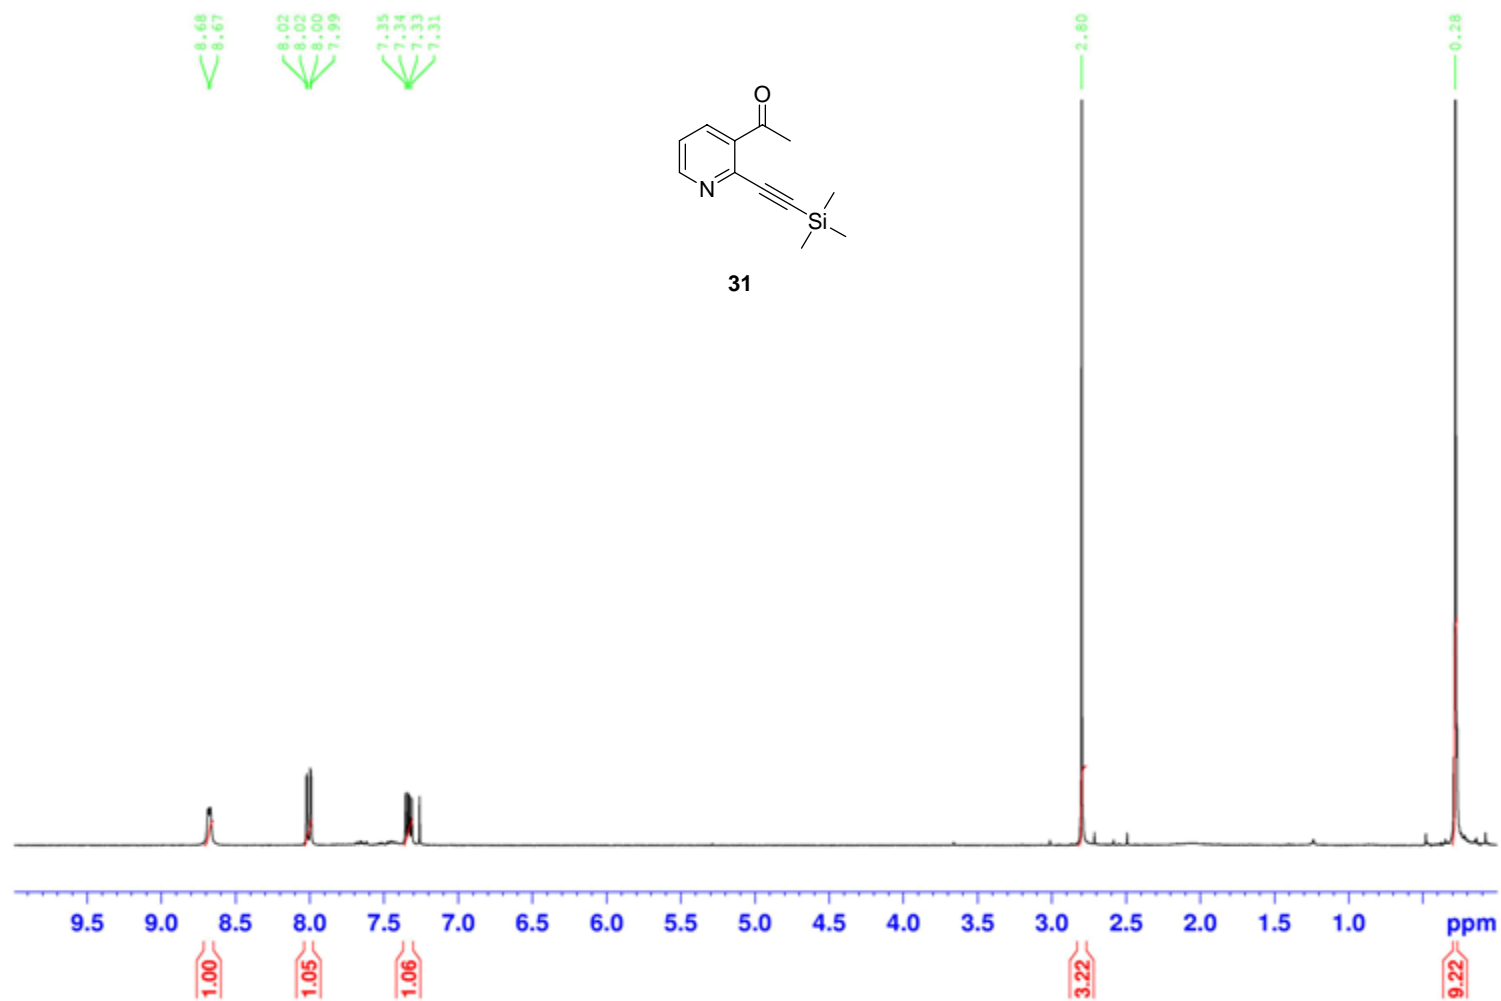

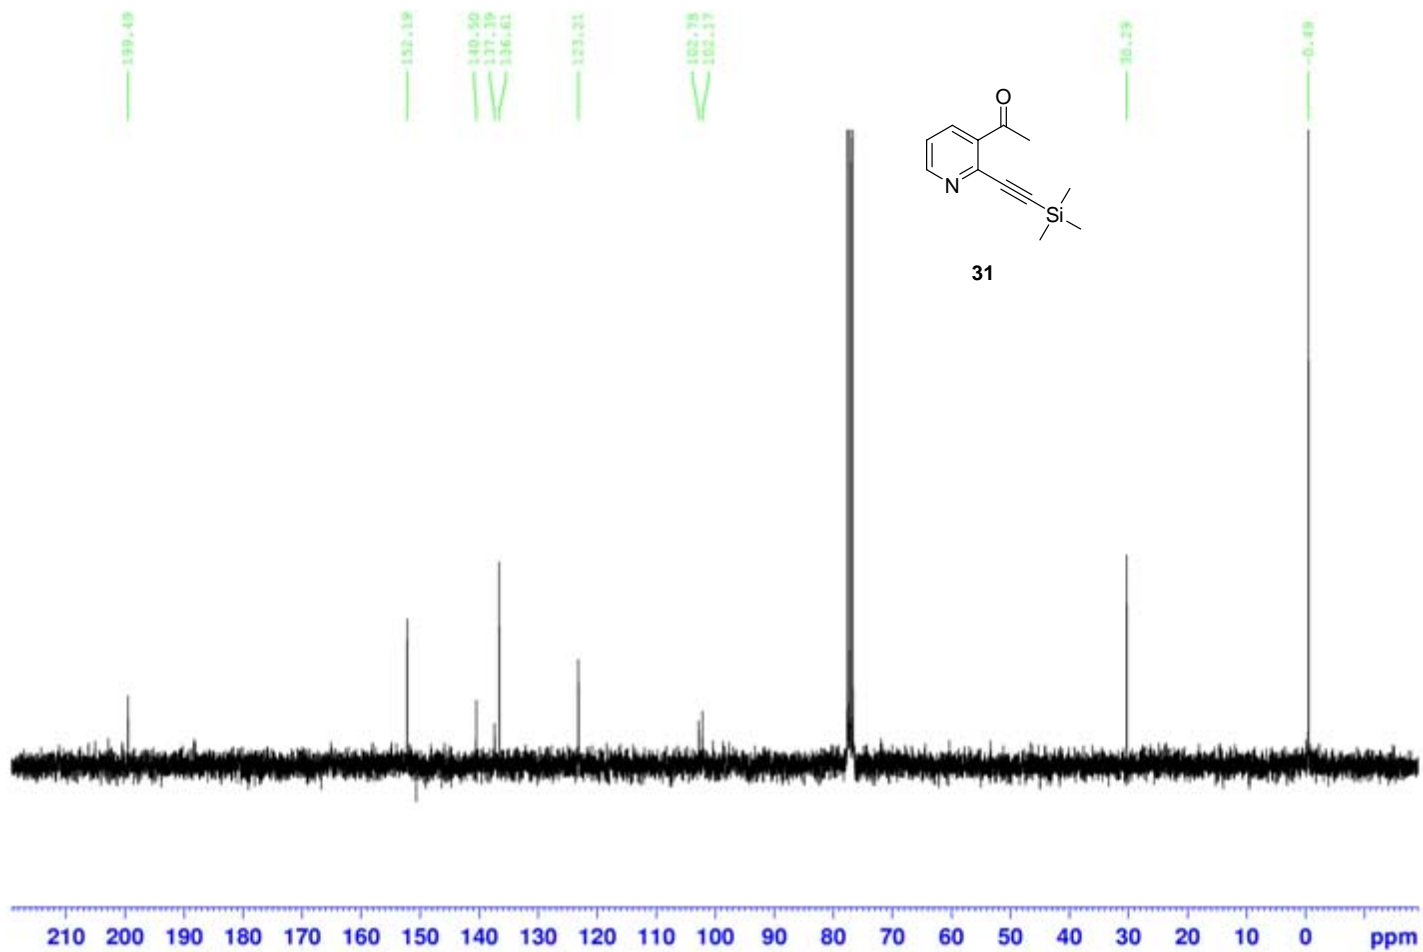

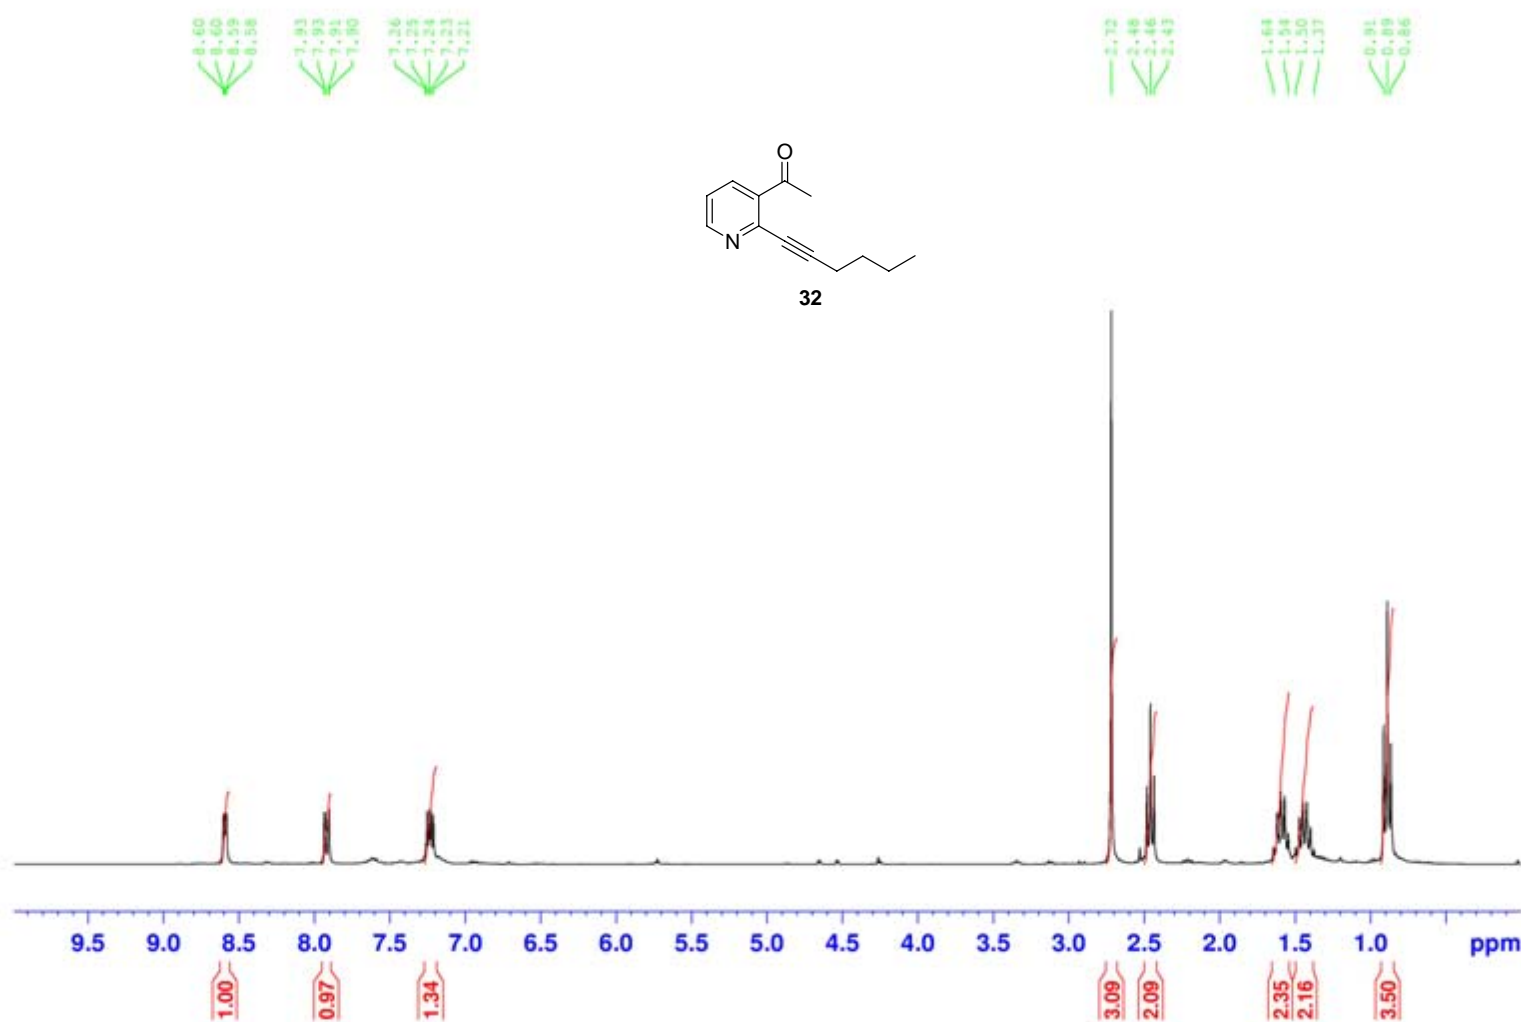

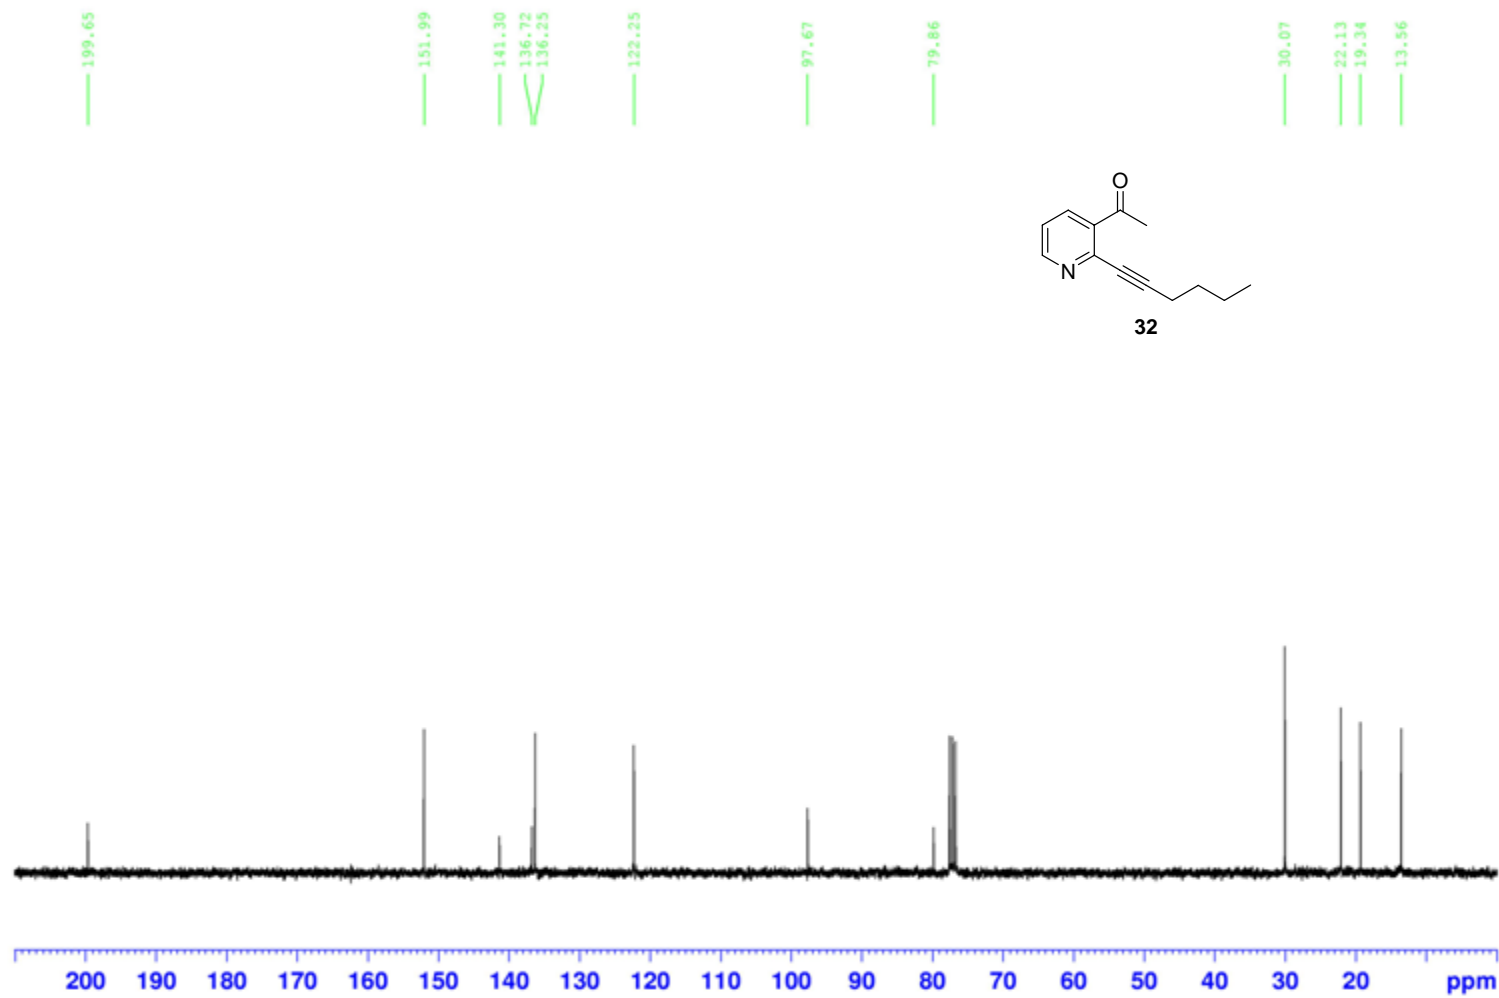



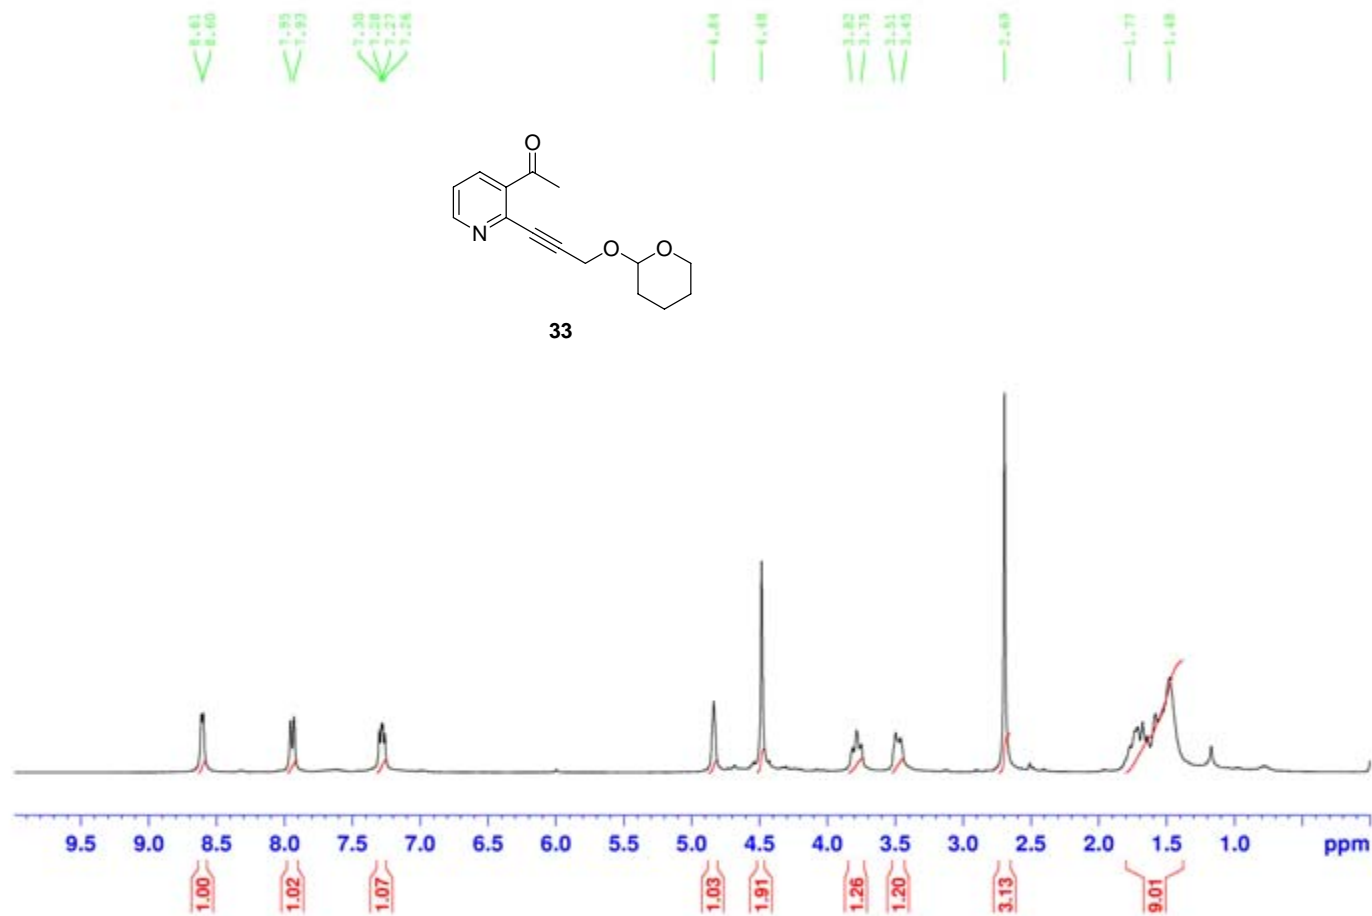

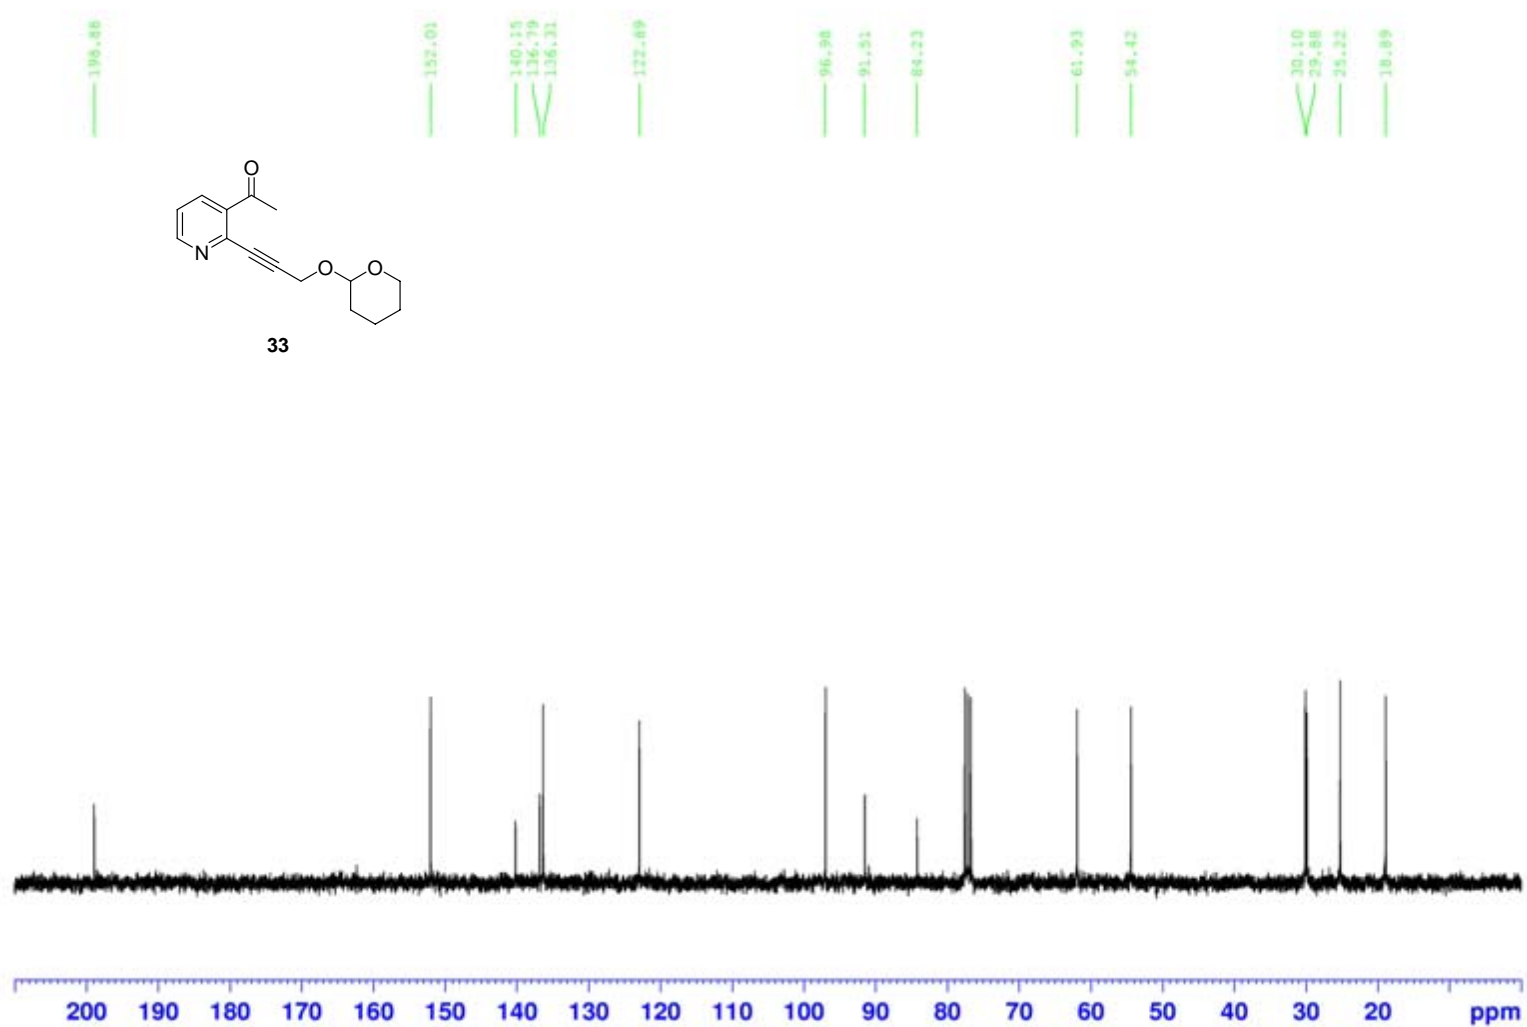

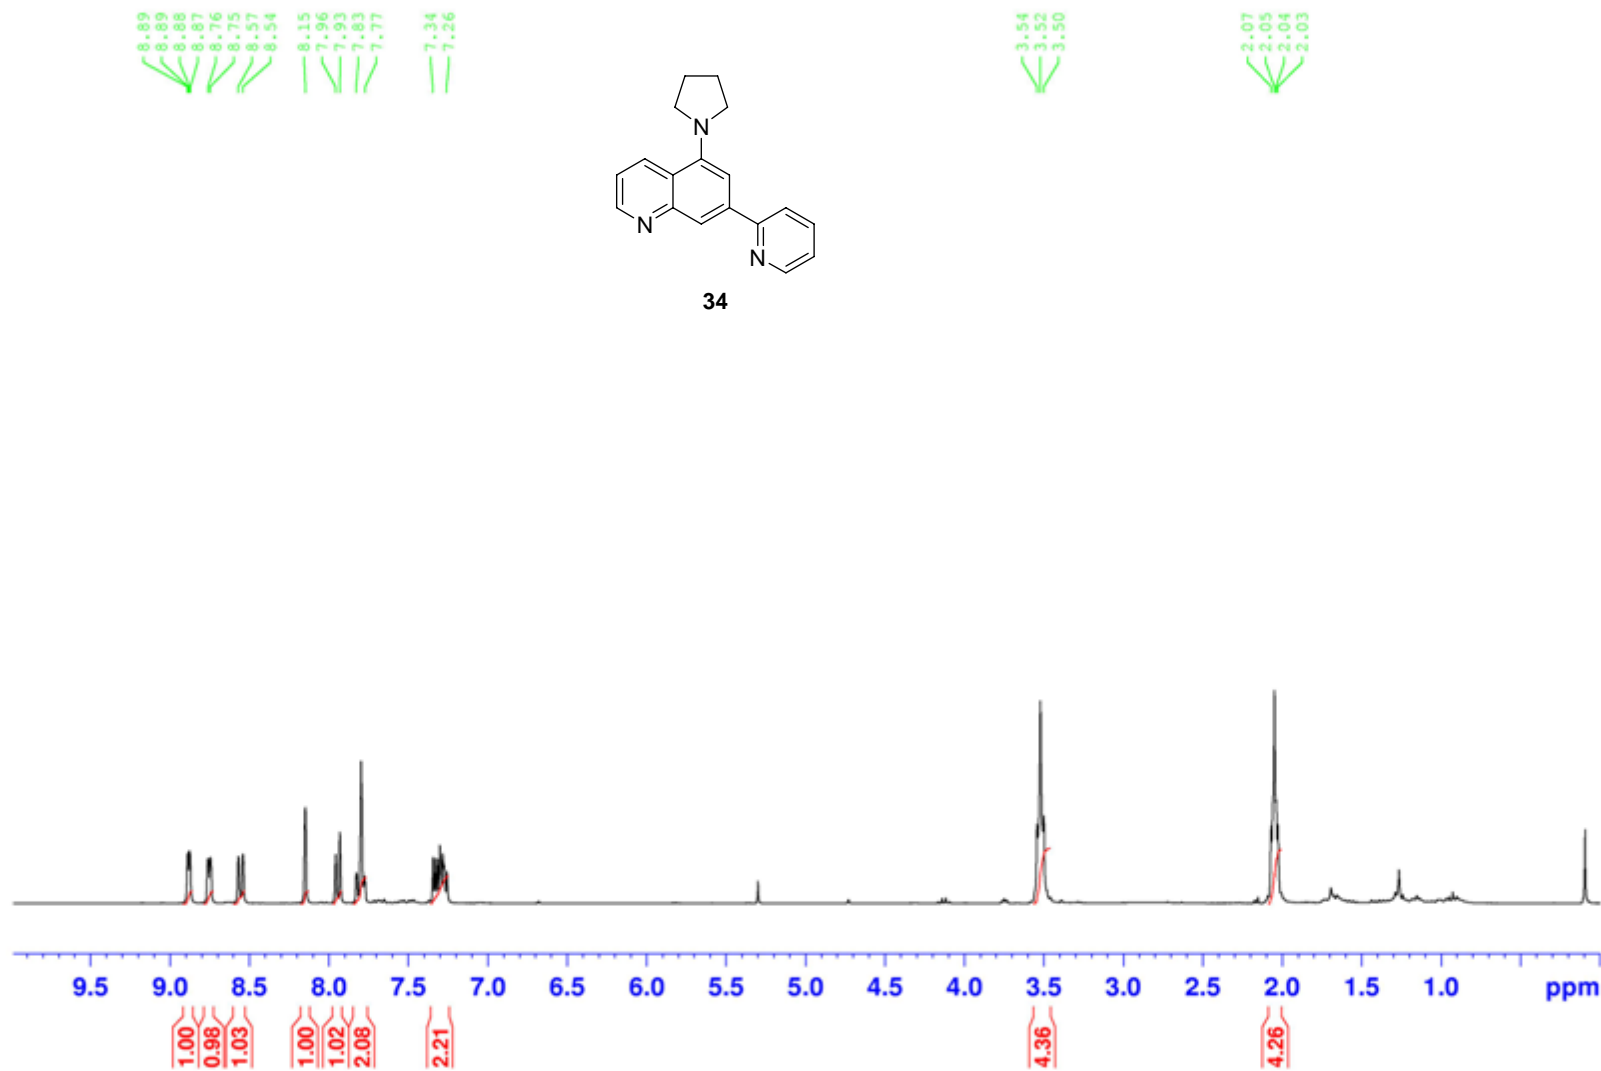

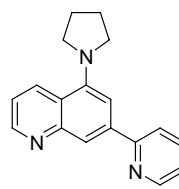

**34**

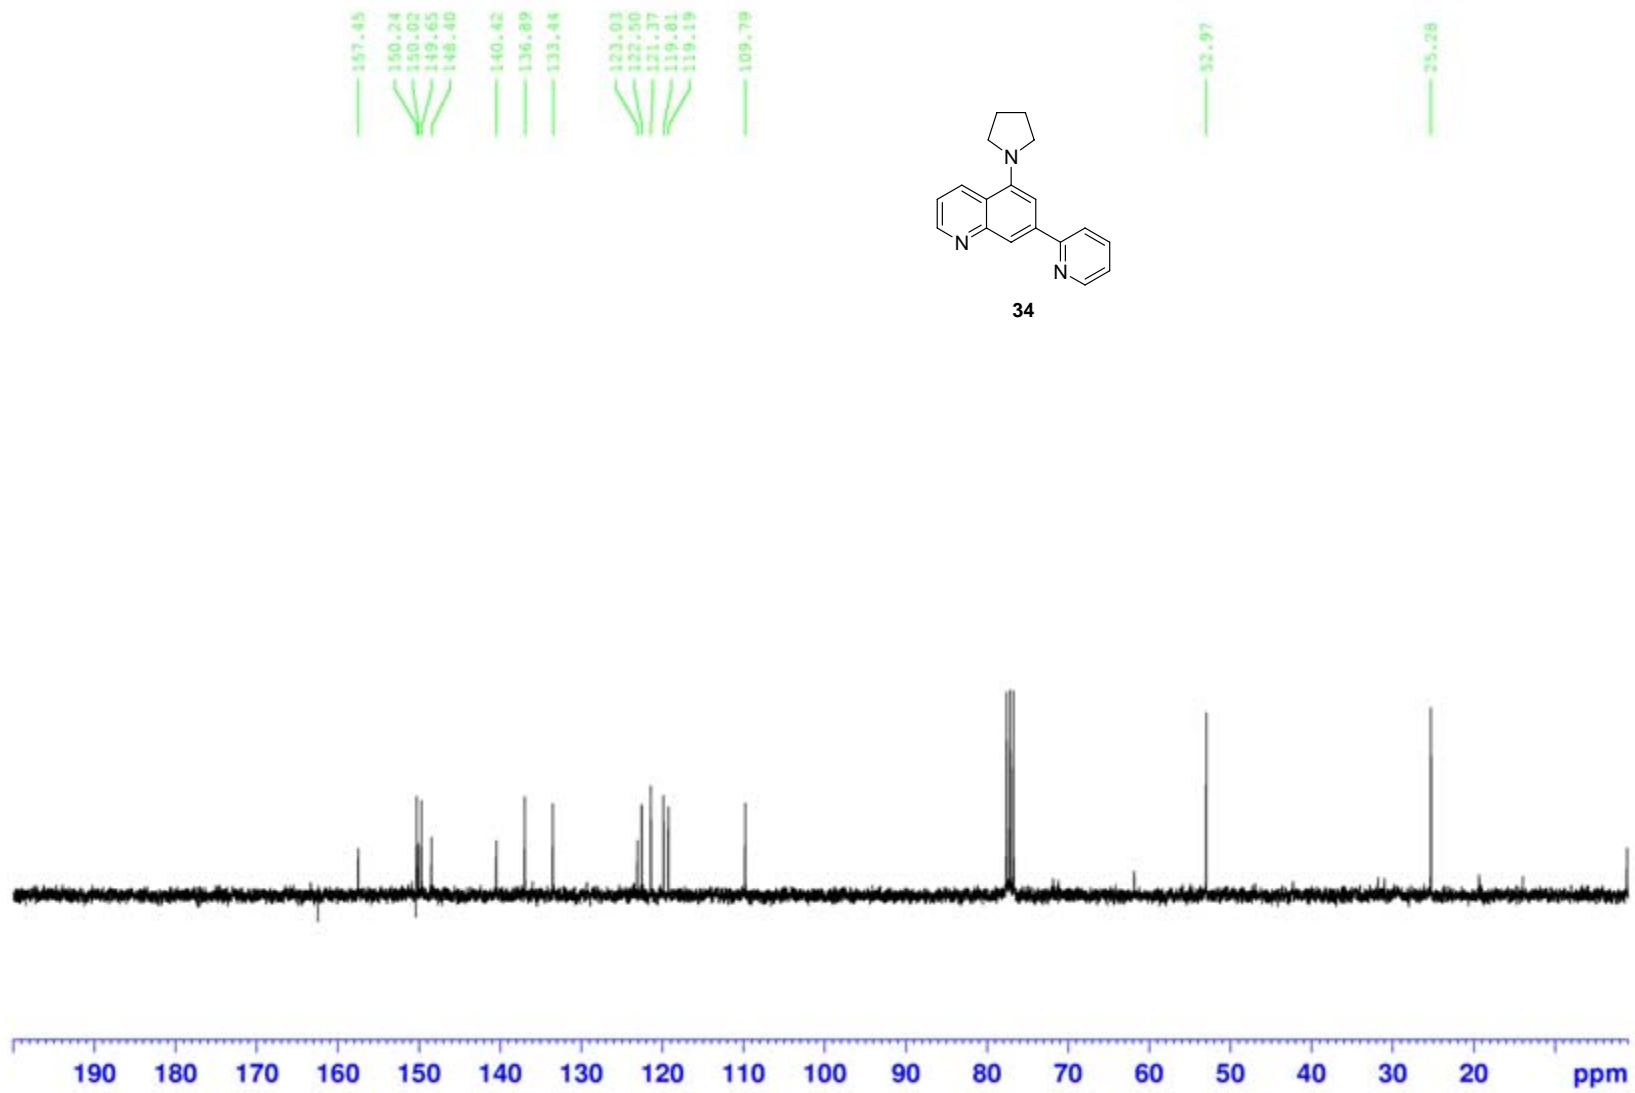

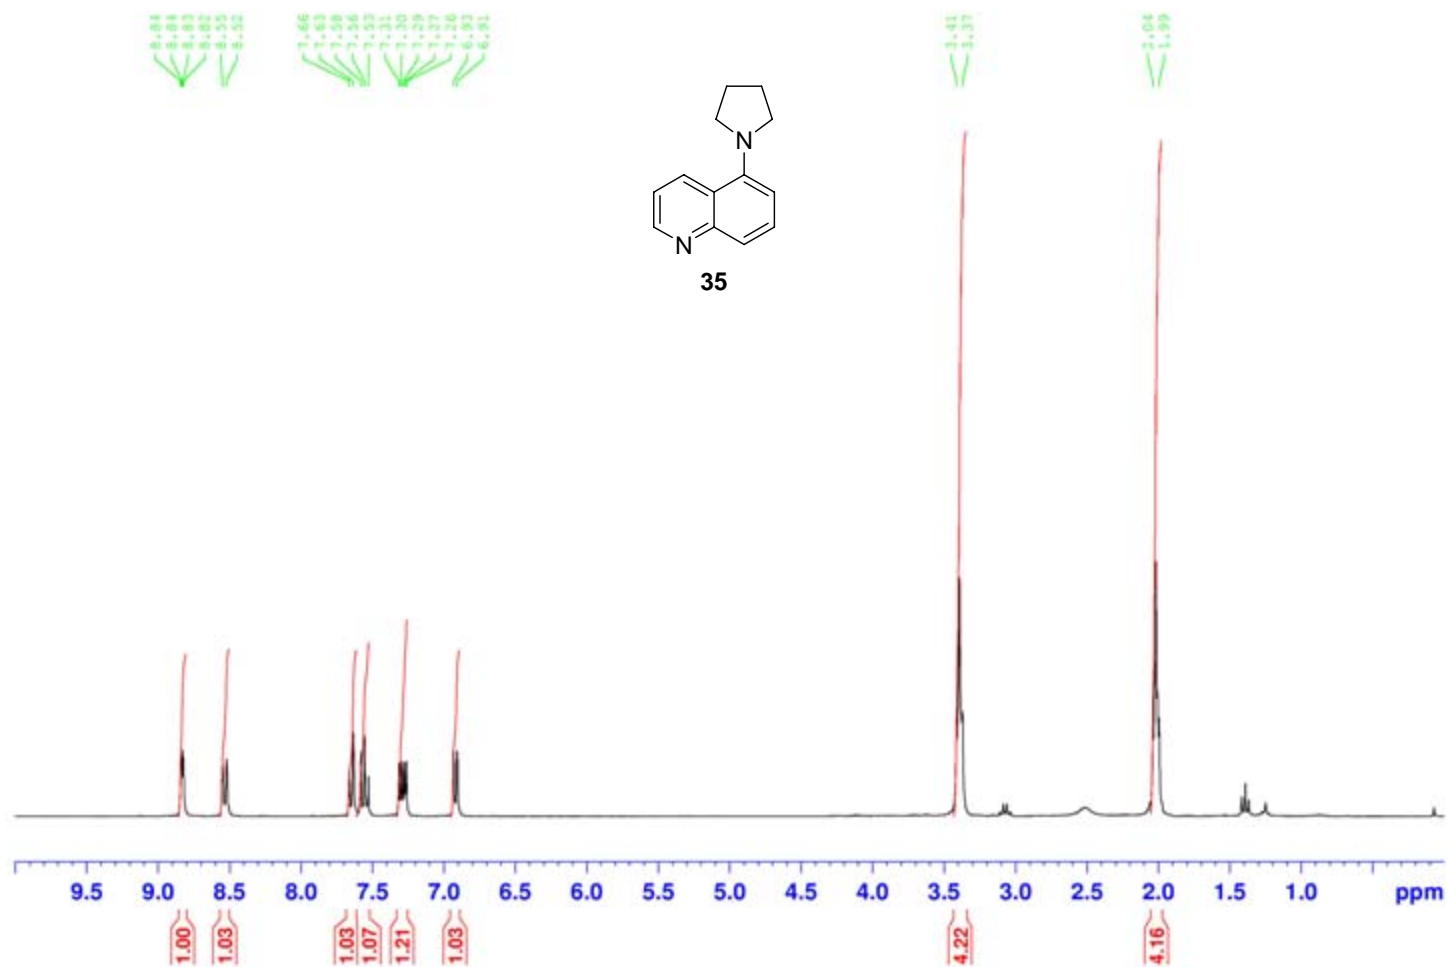

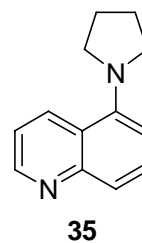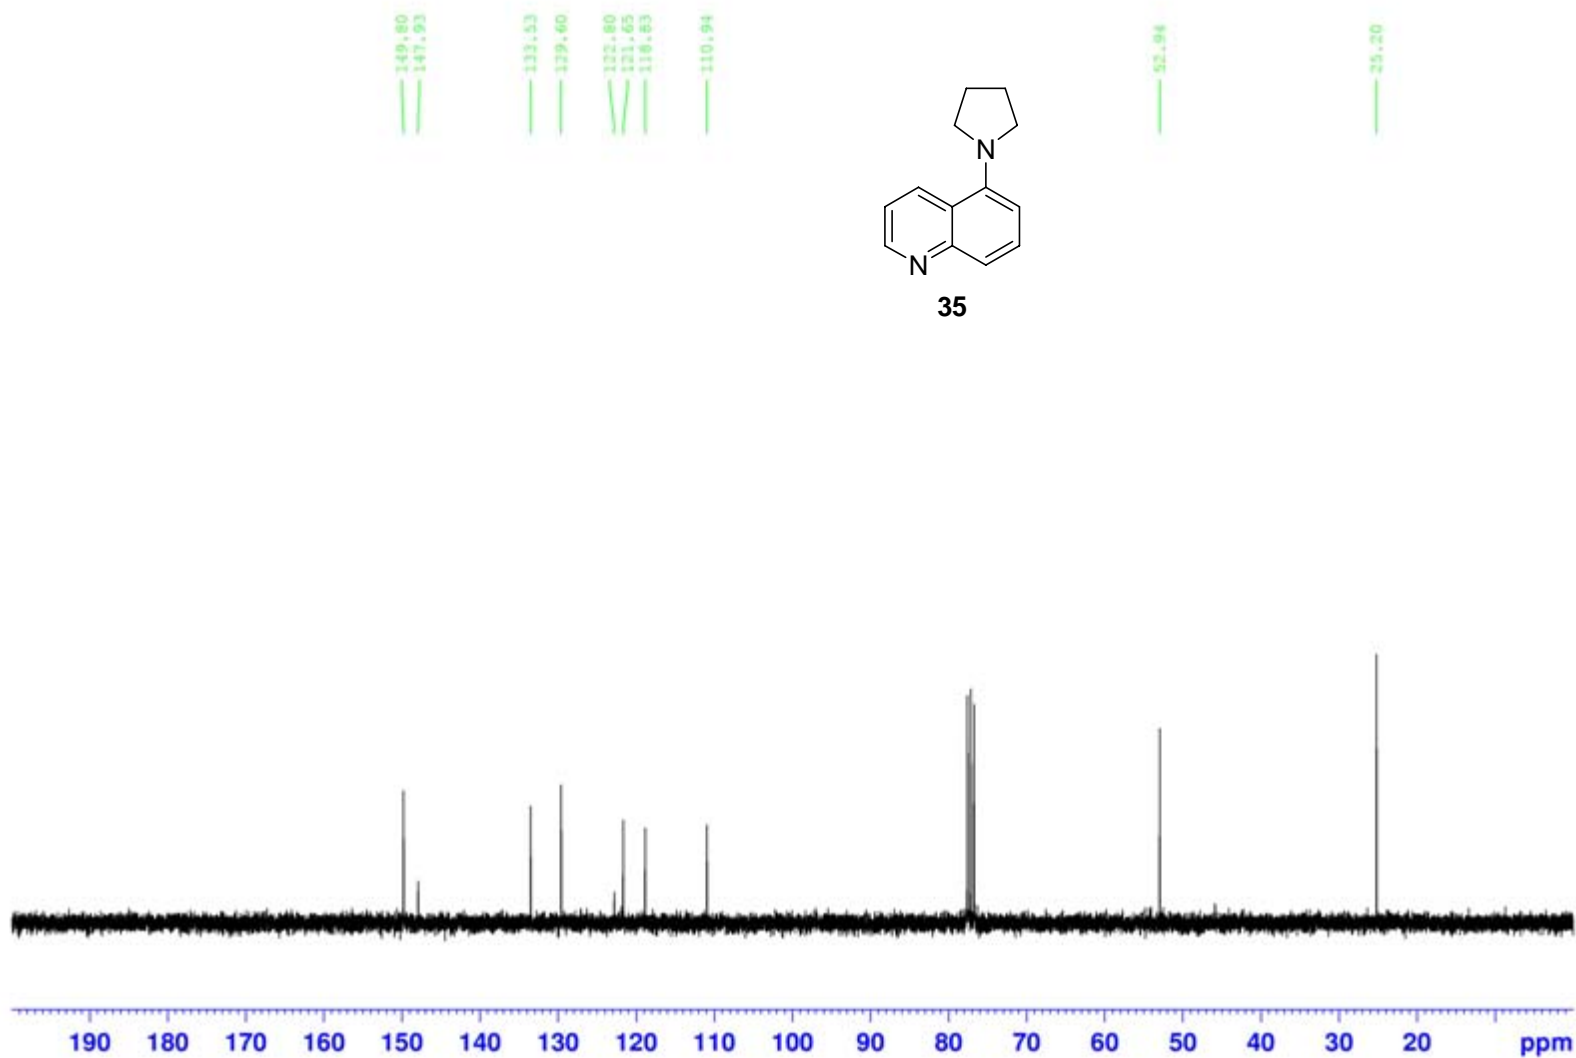

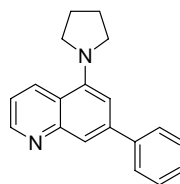

36

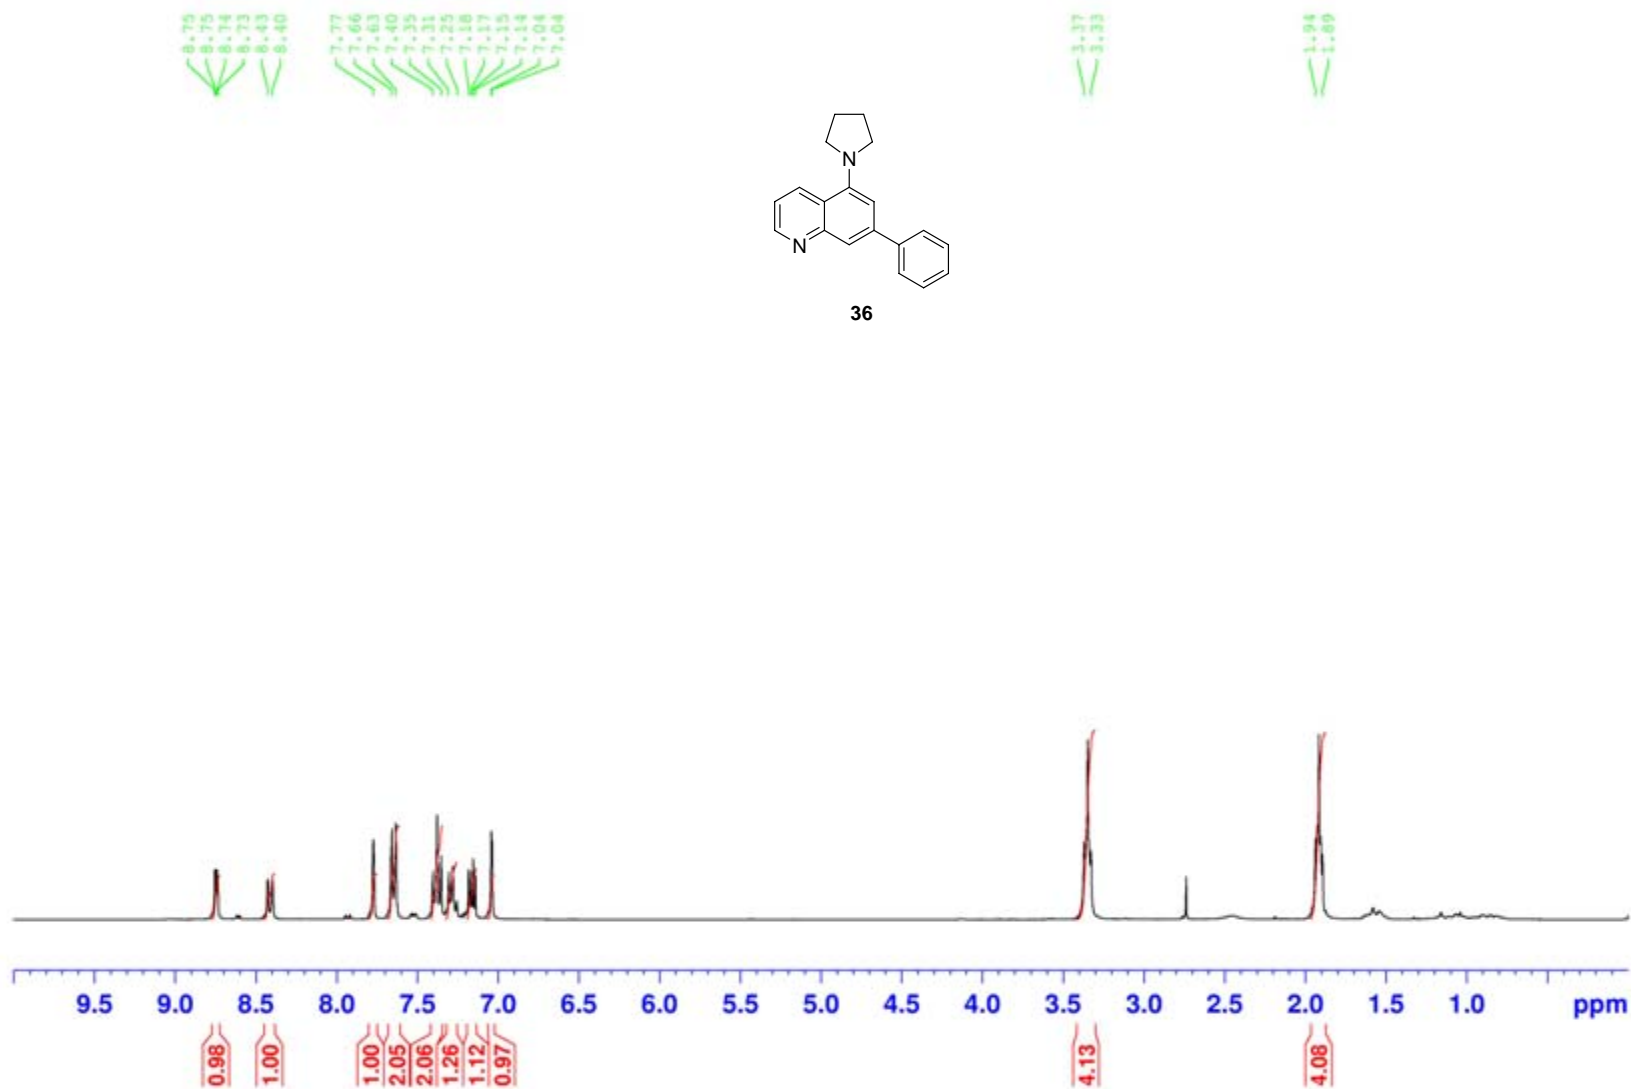

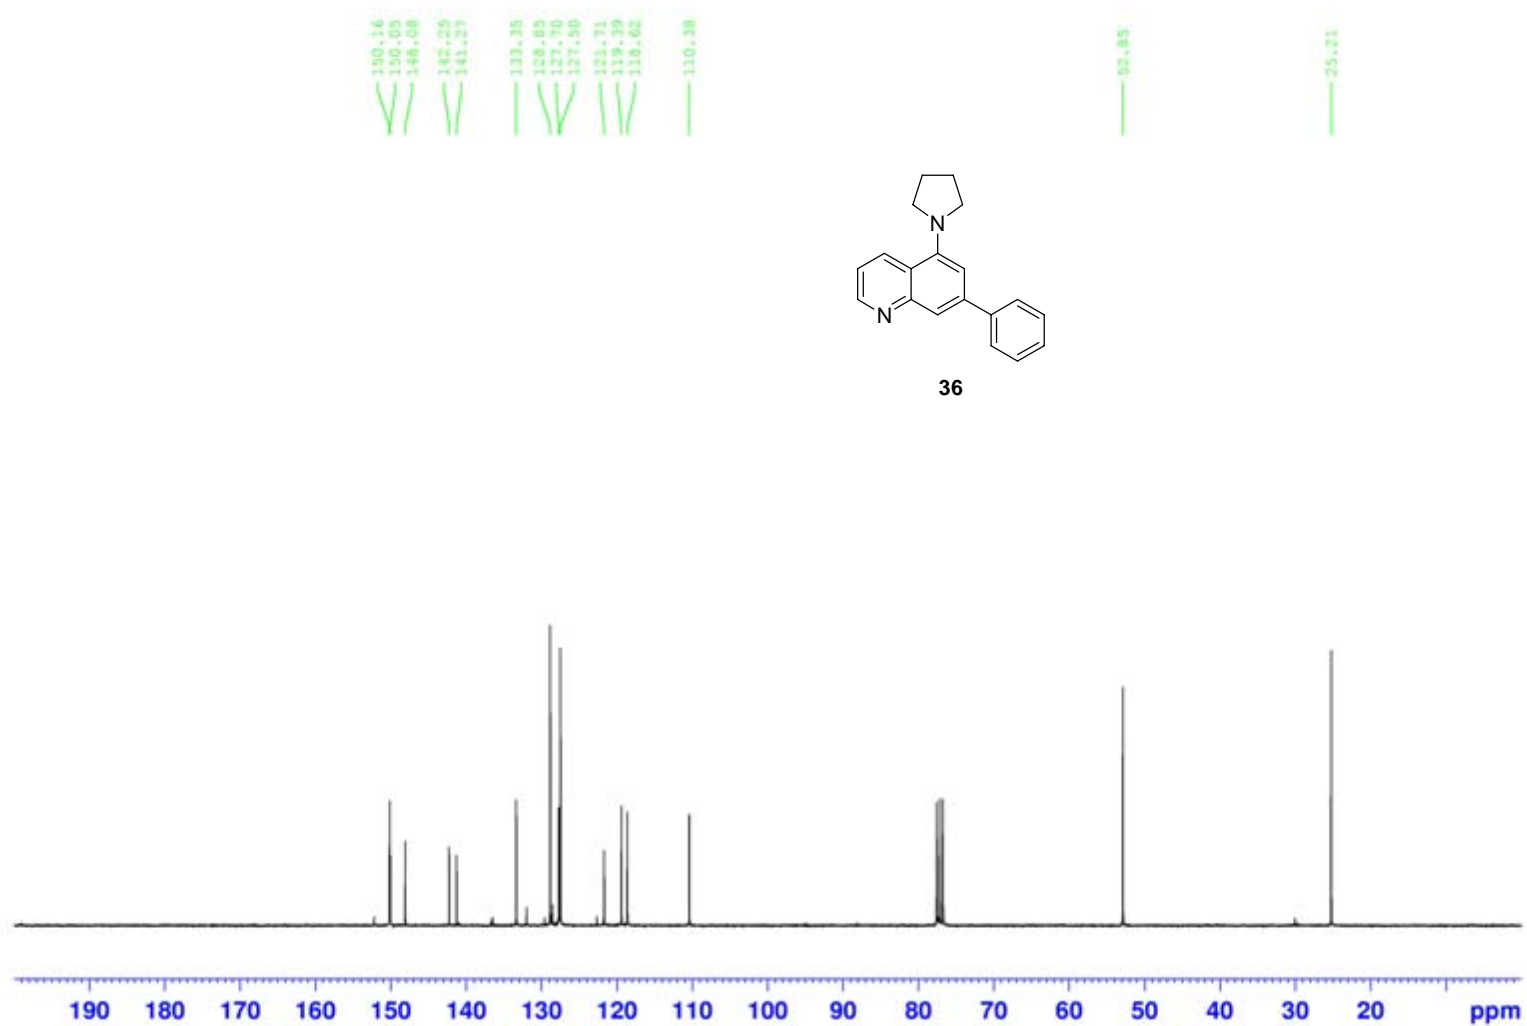



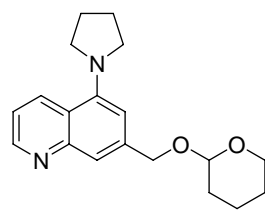

37

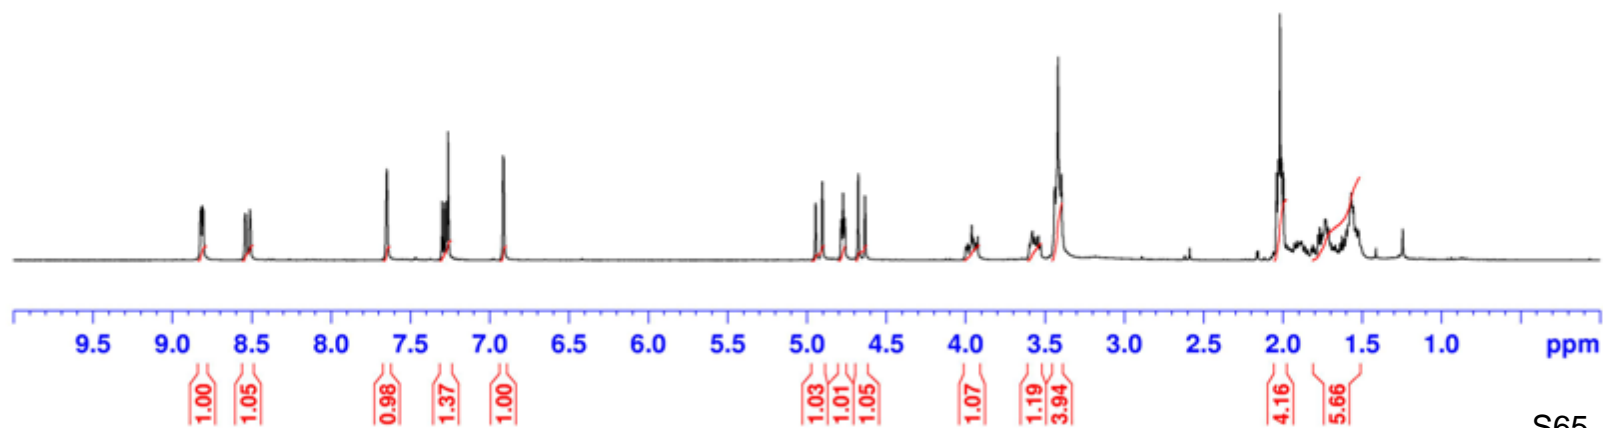

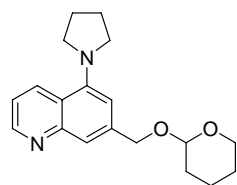

37

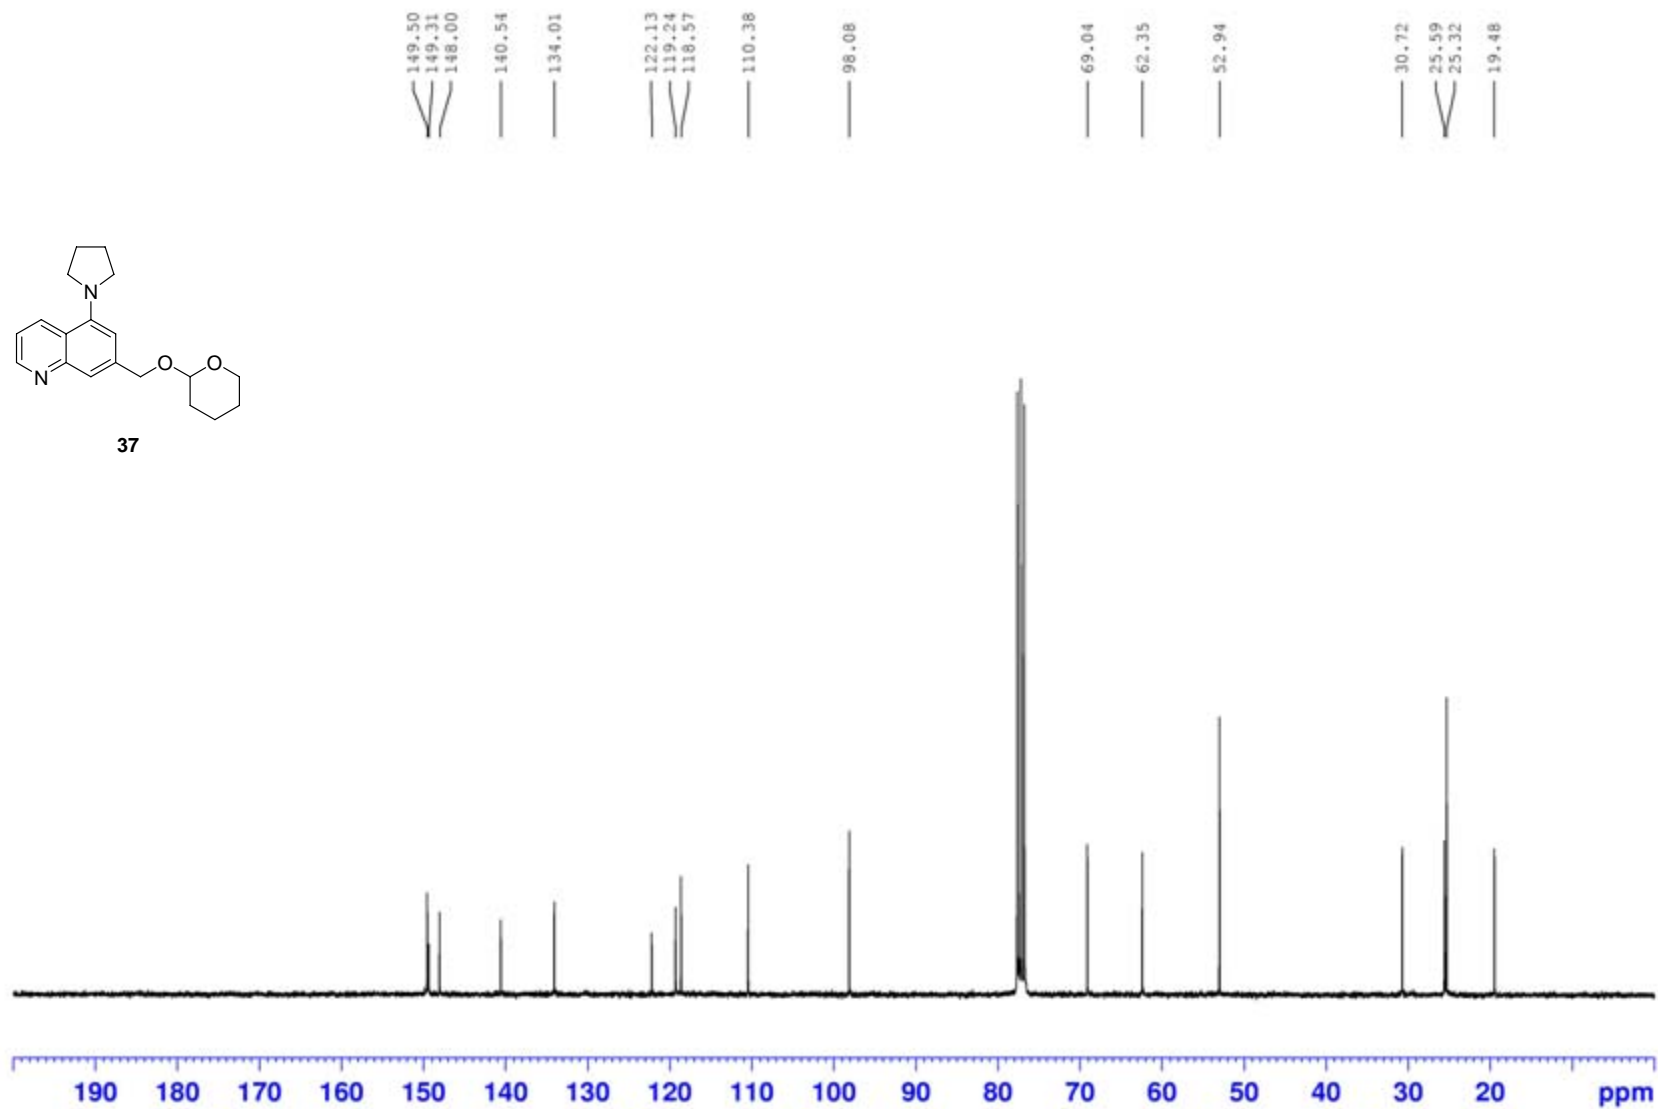

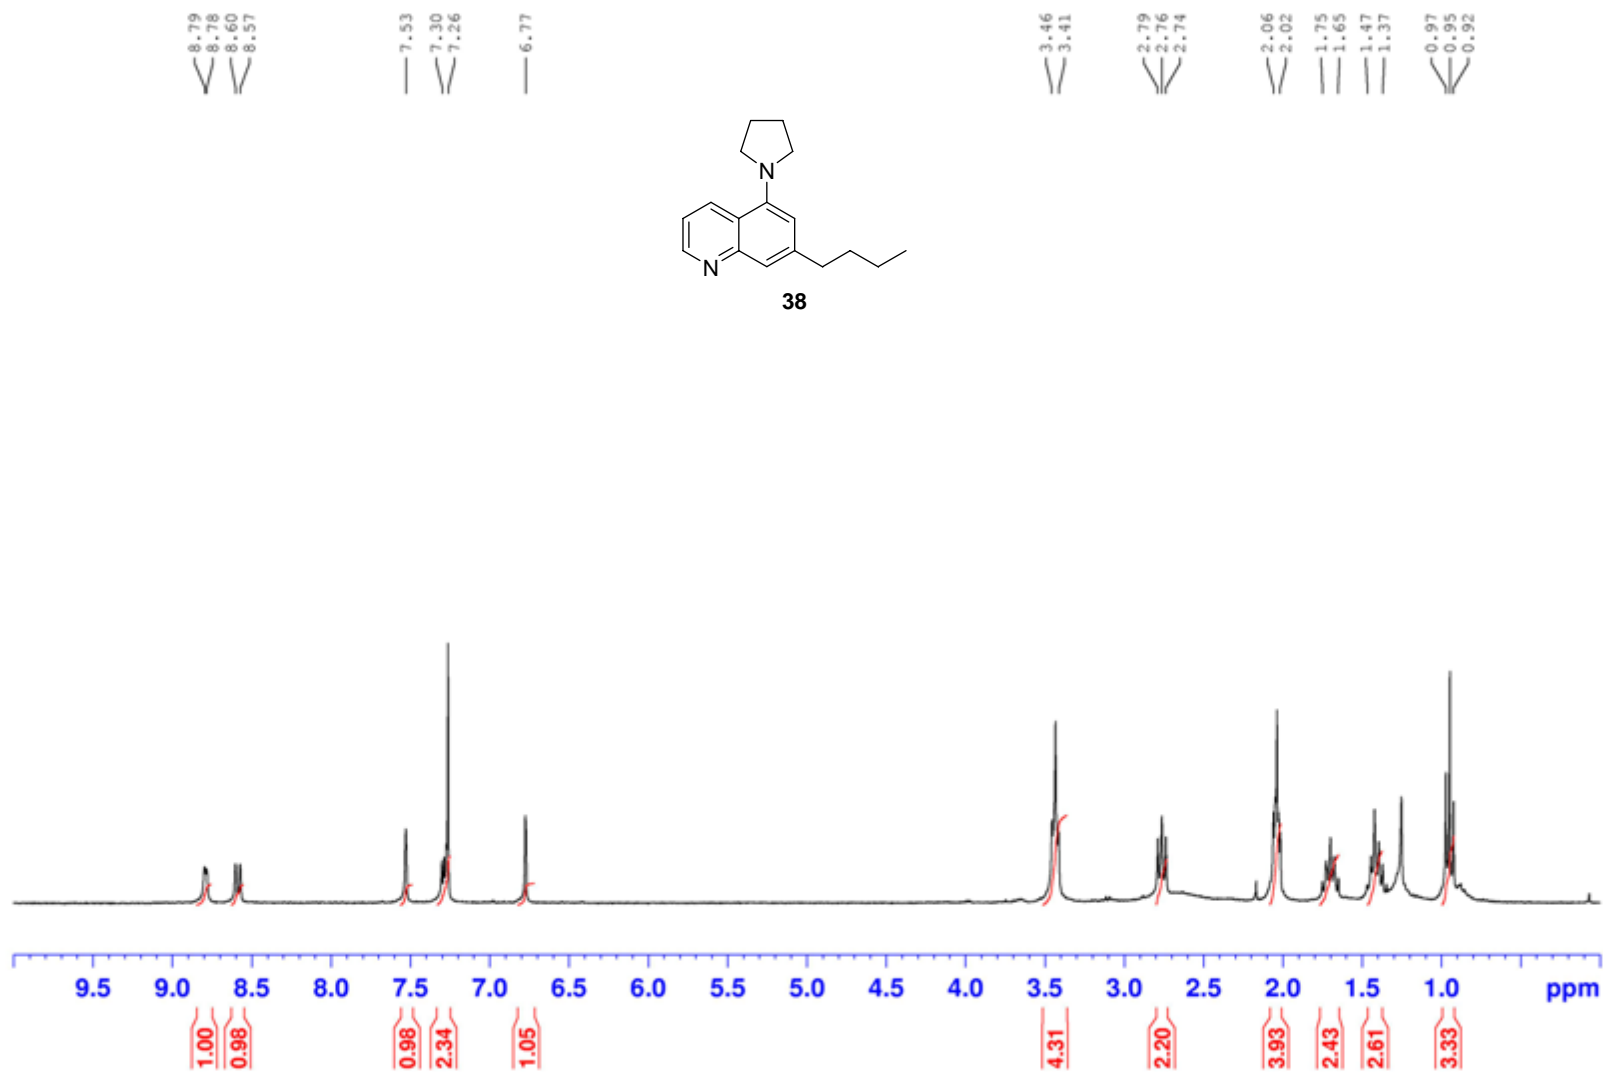

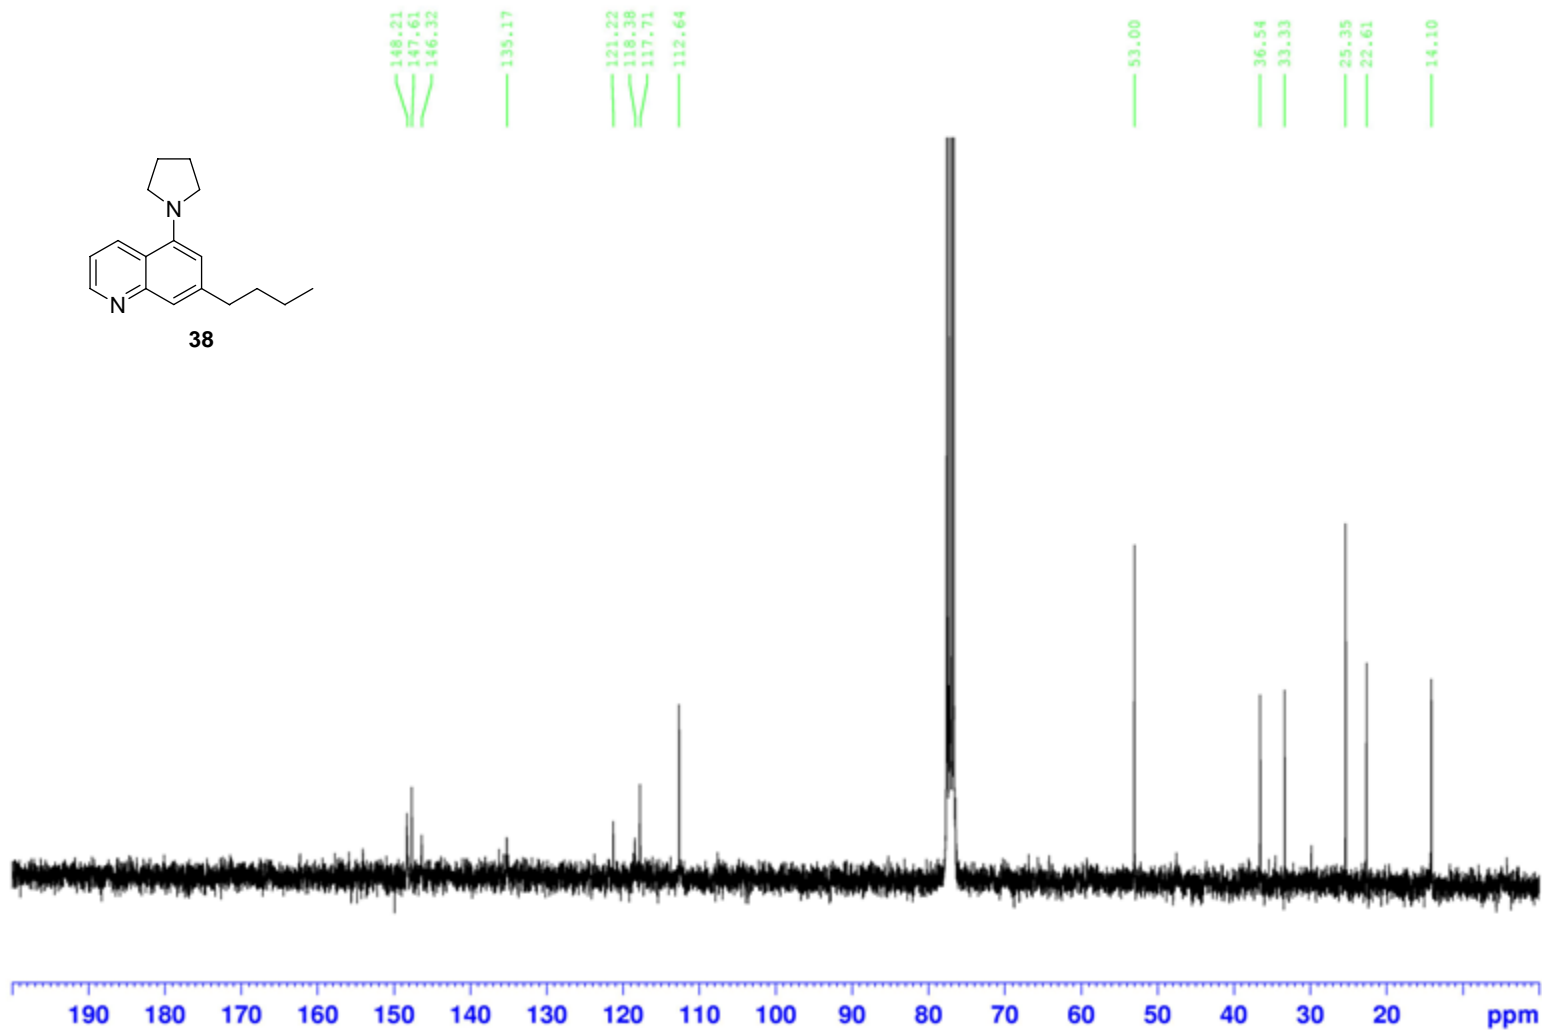

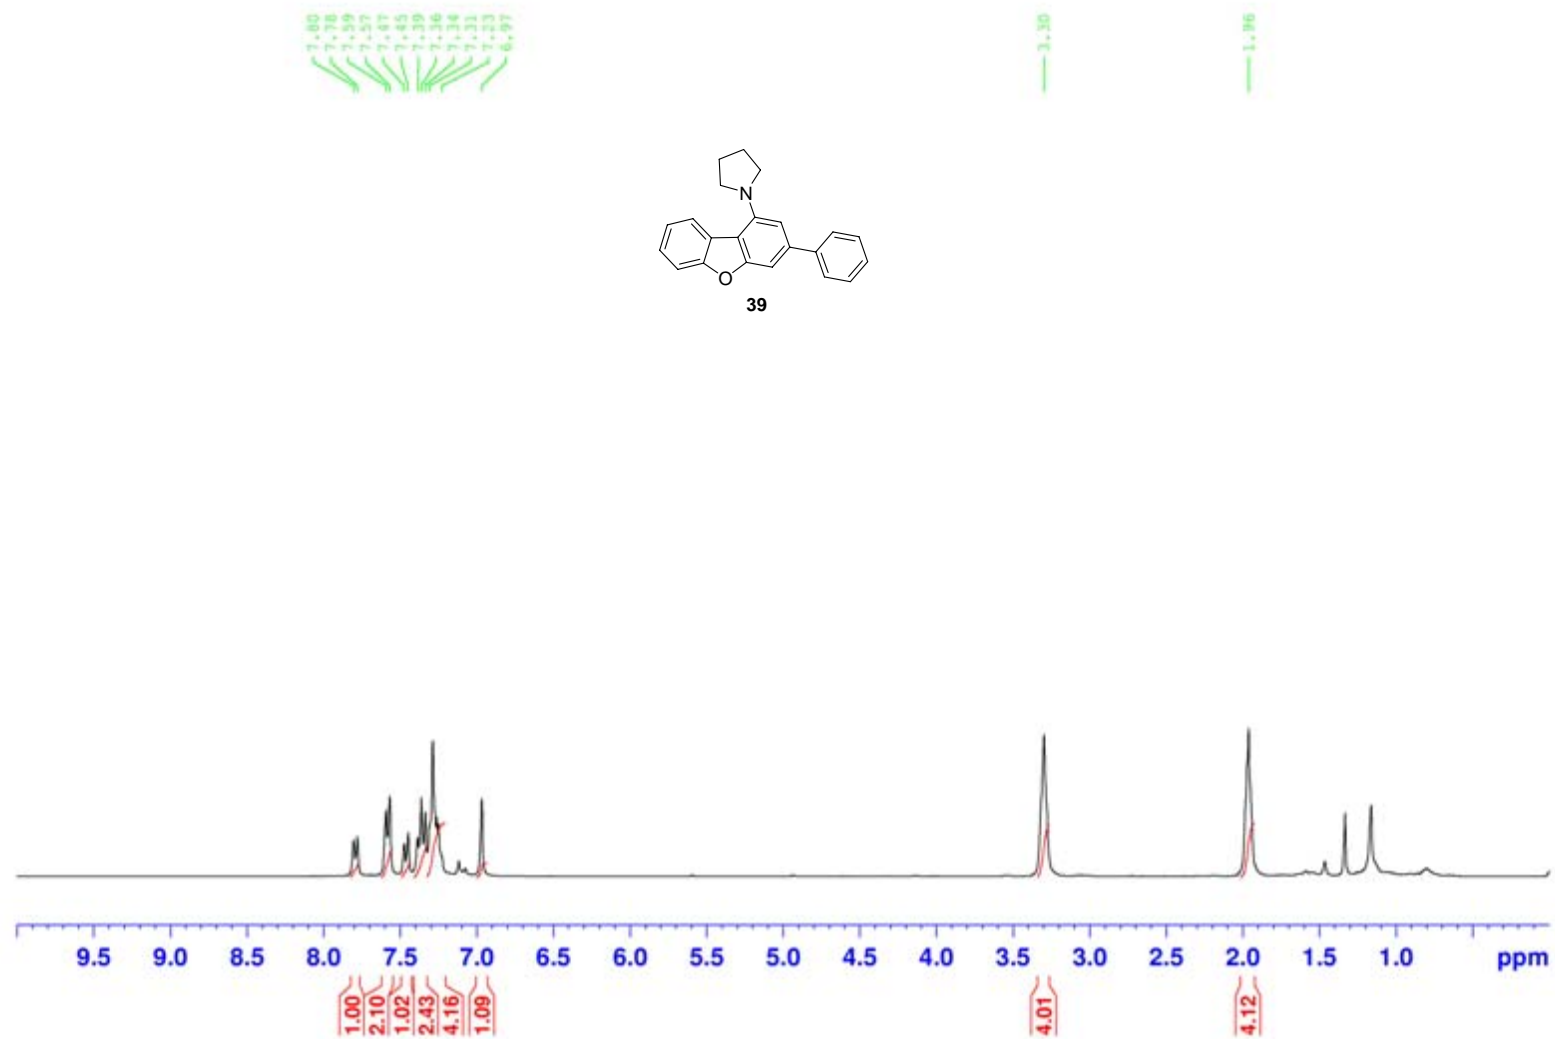

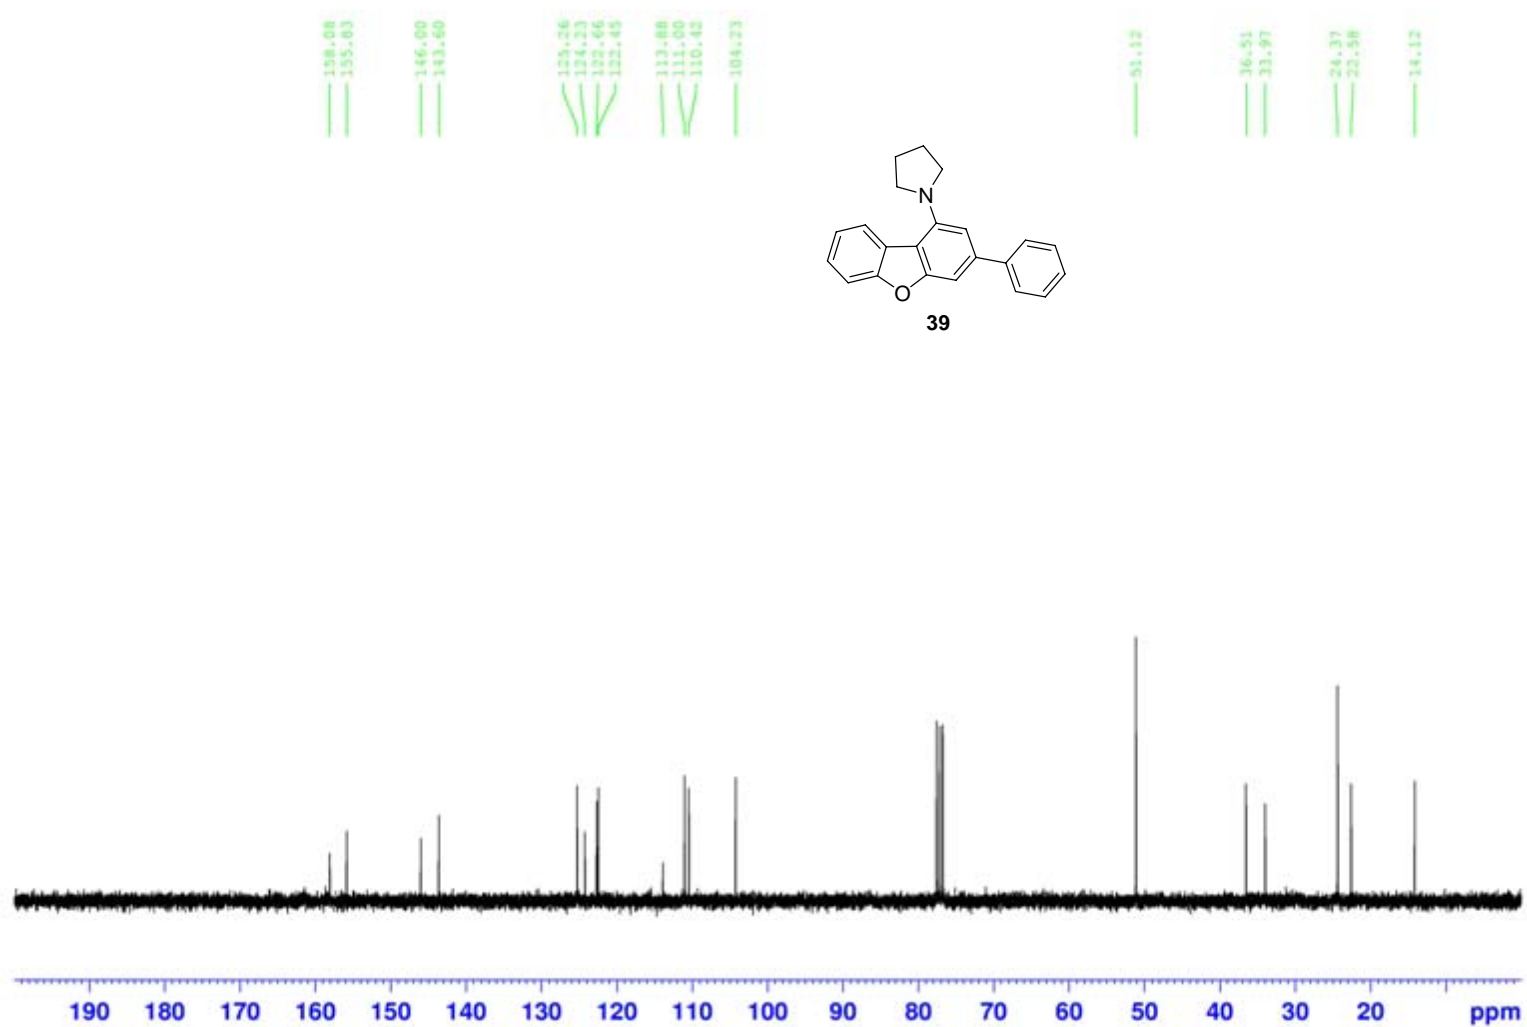

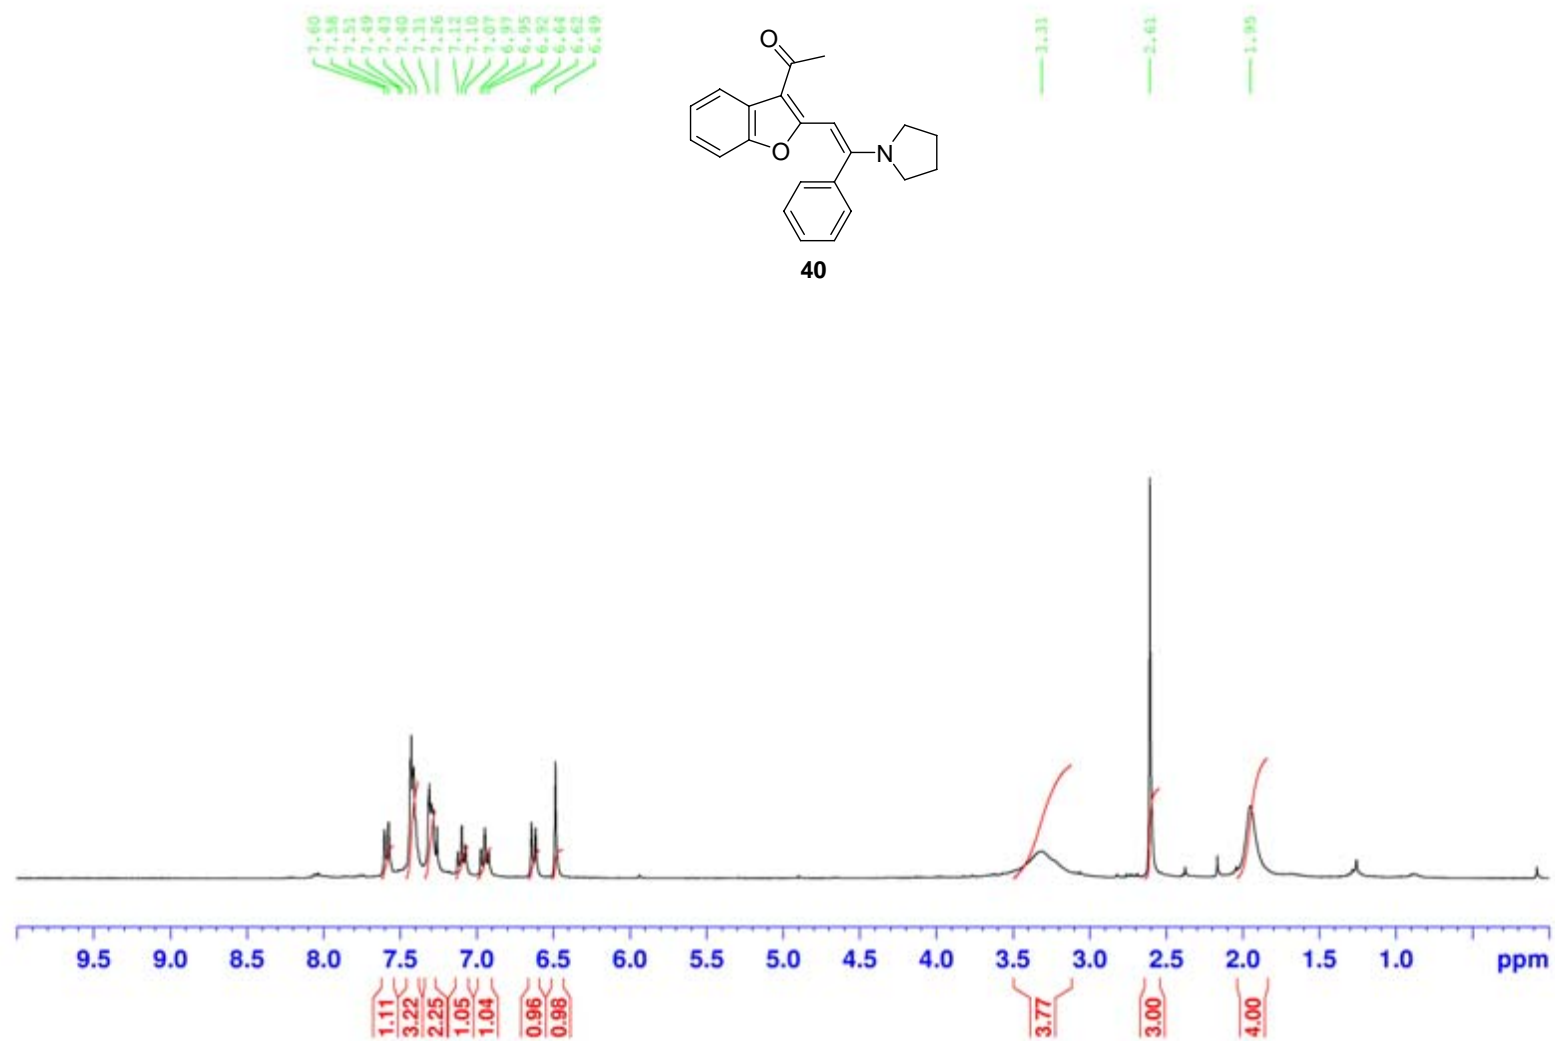

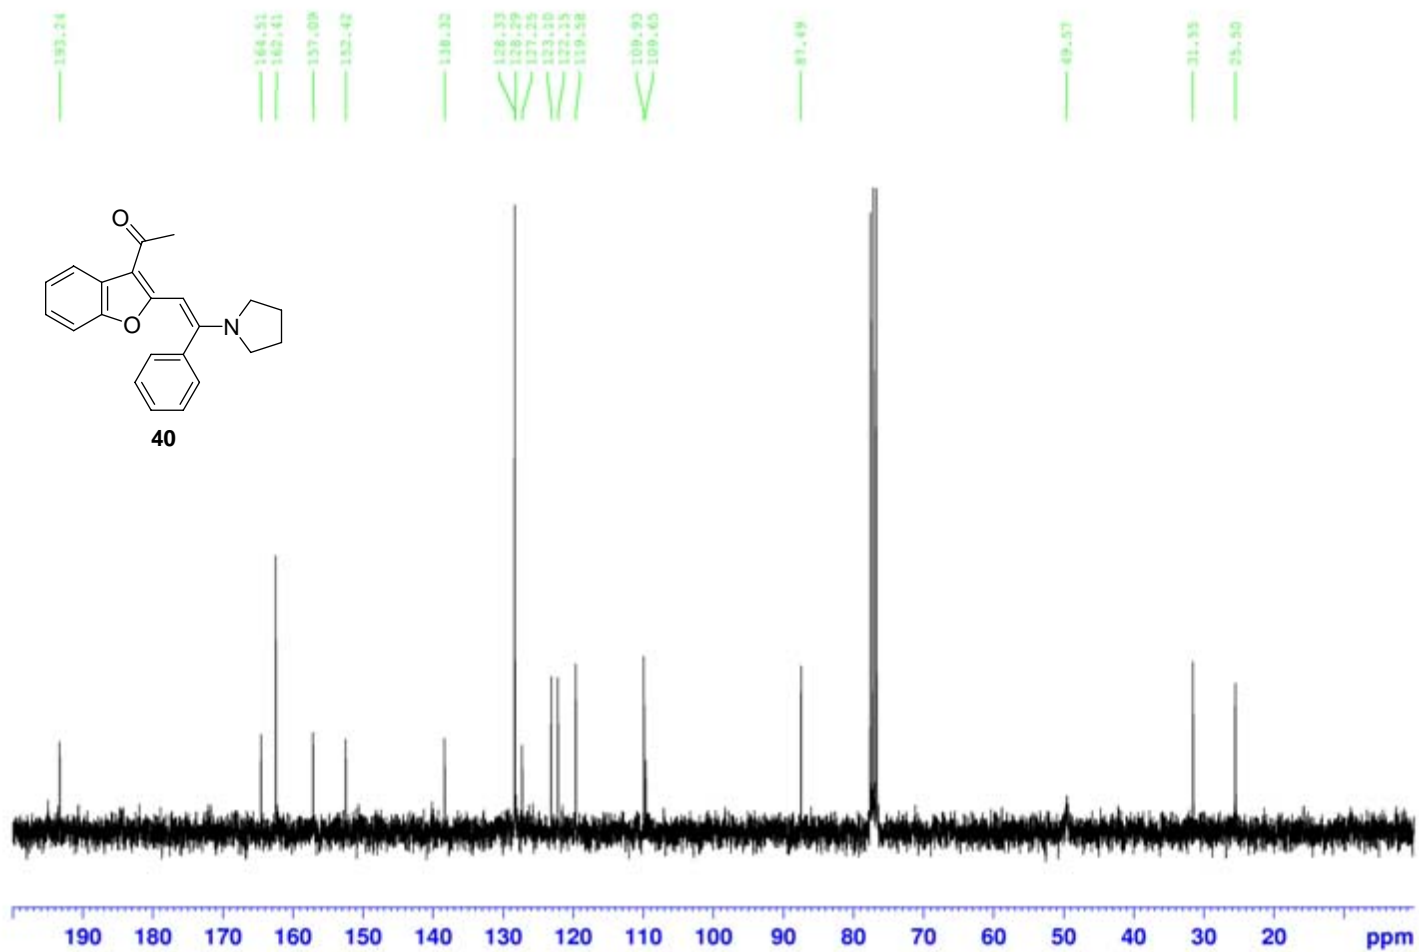



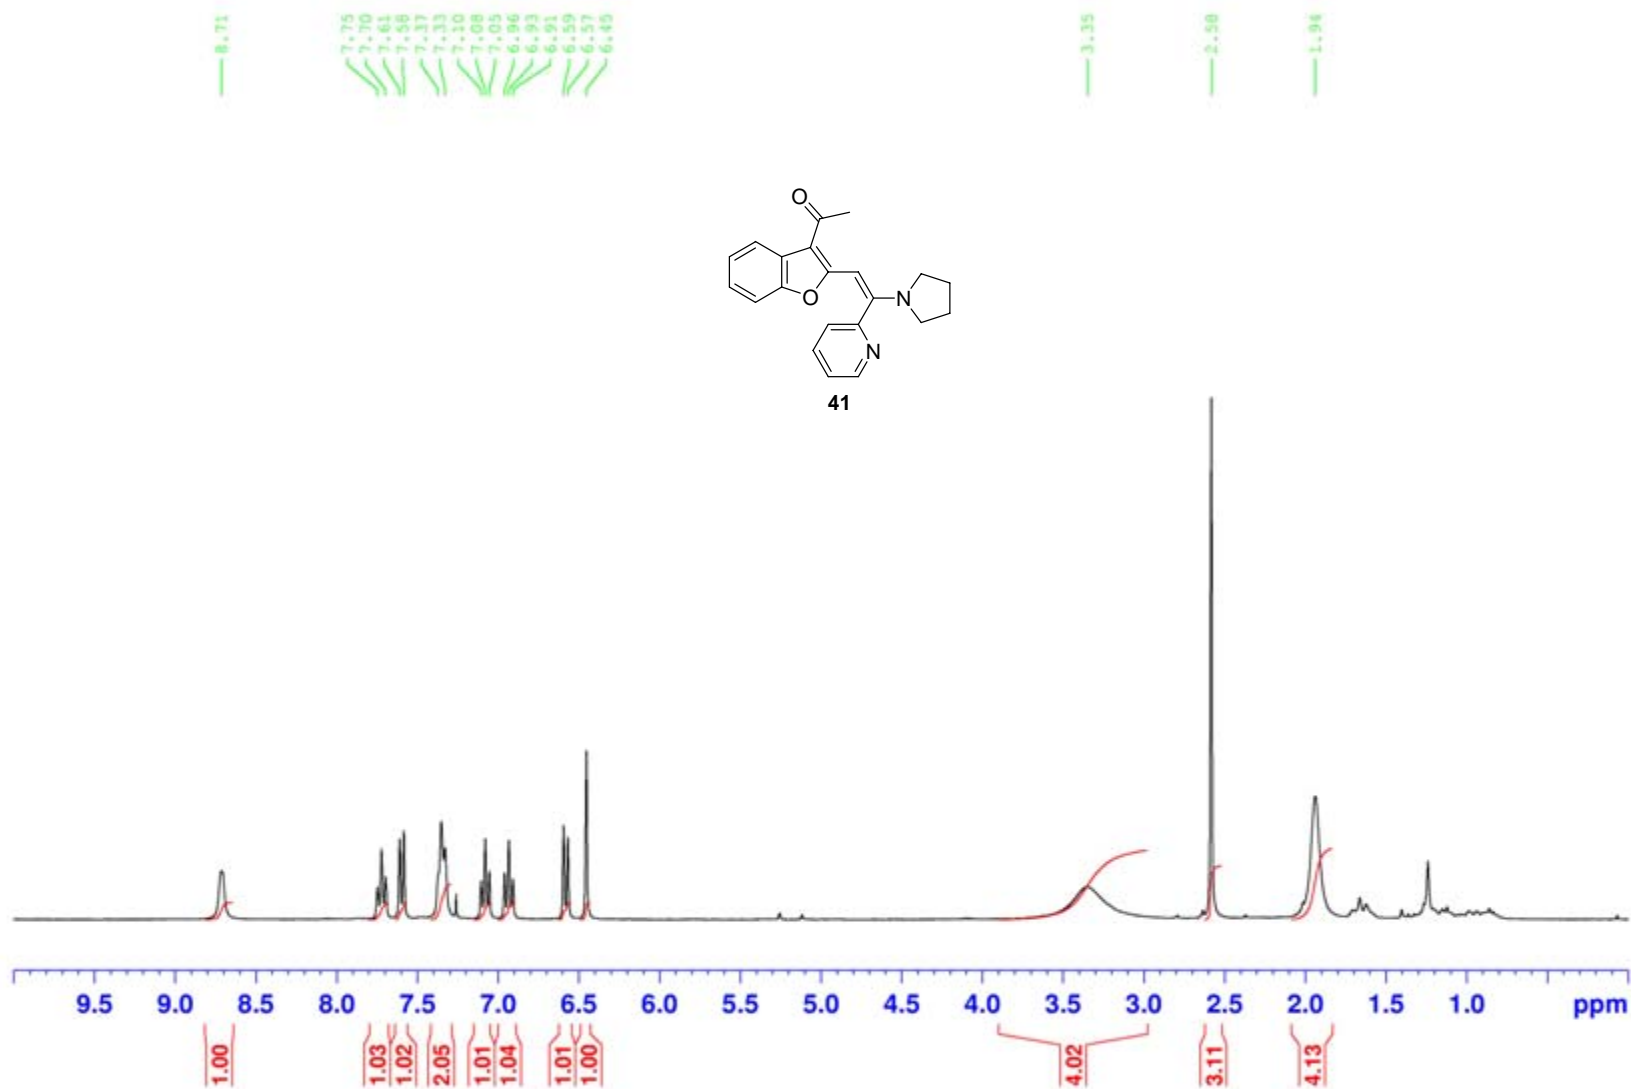

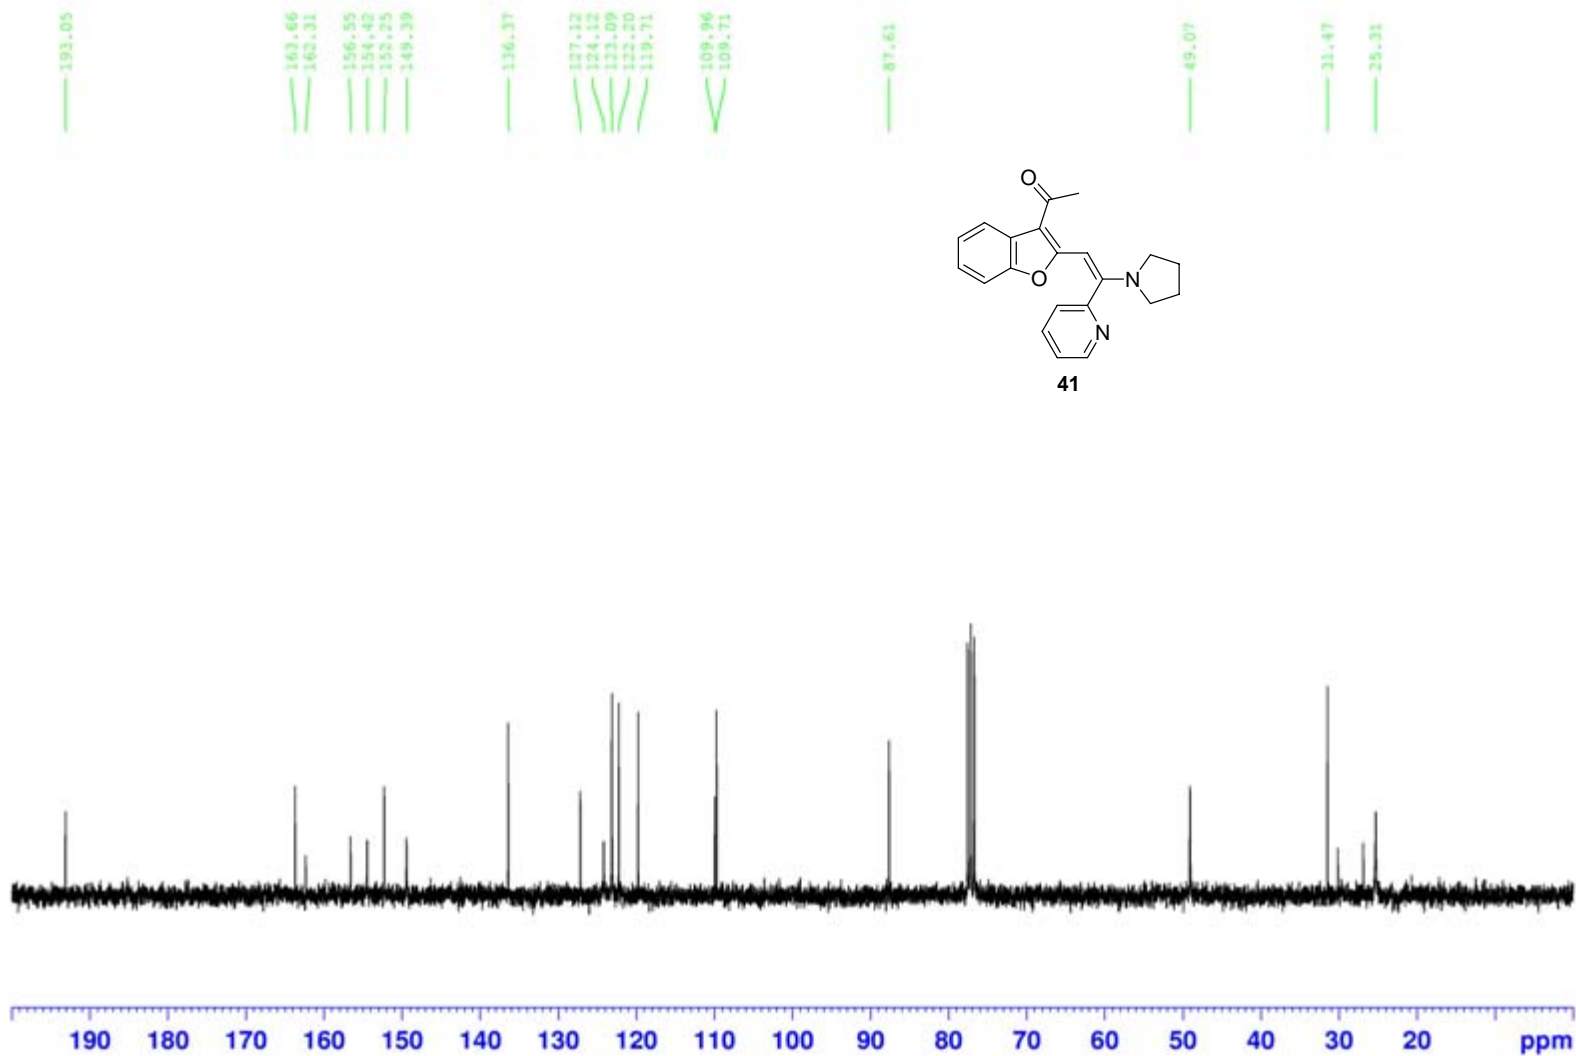

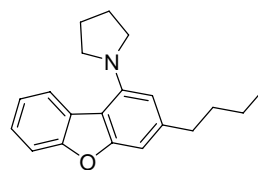

42

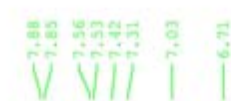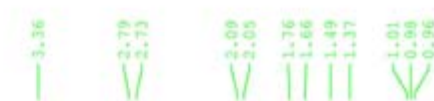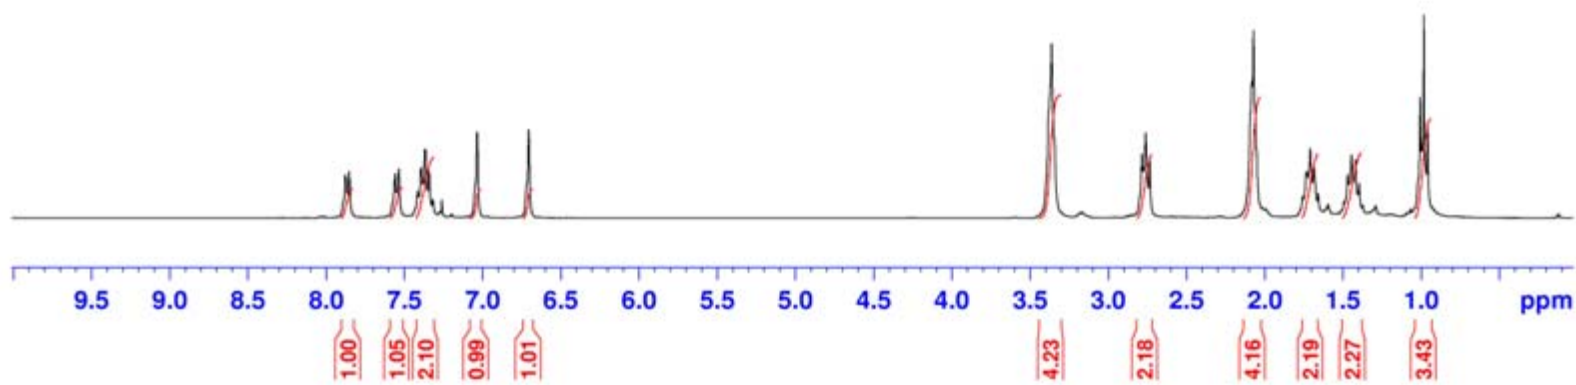

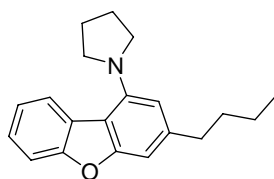

42

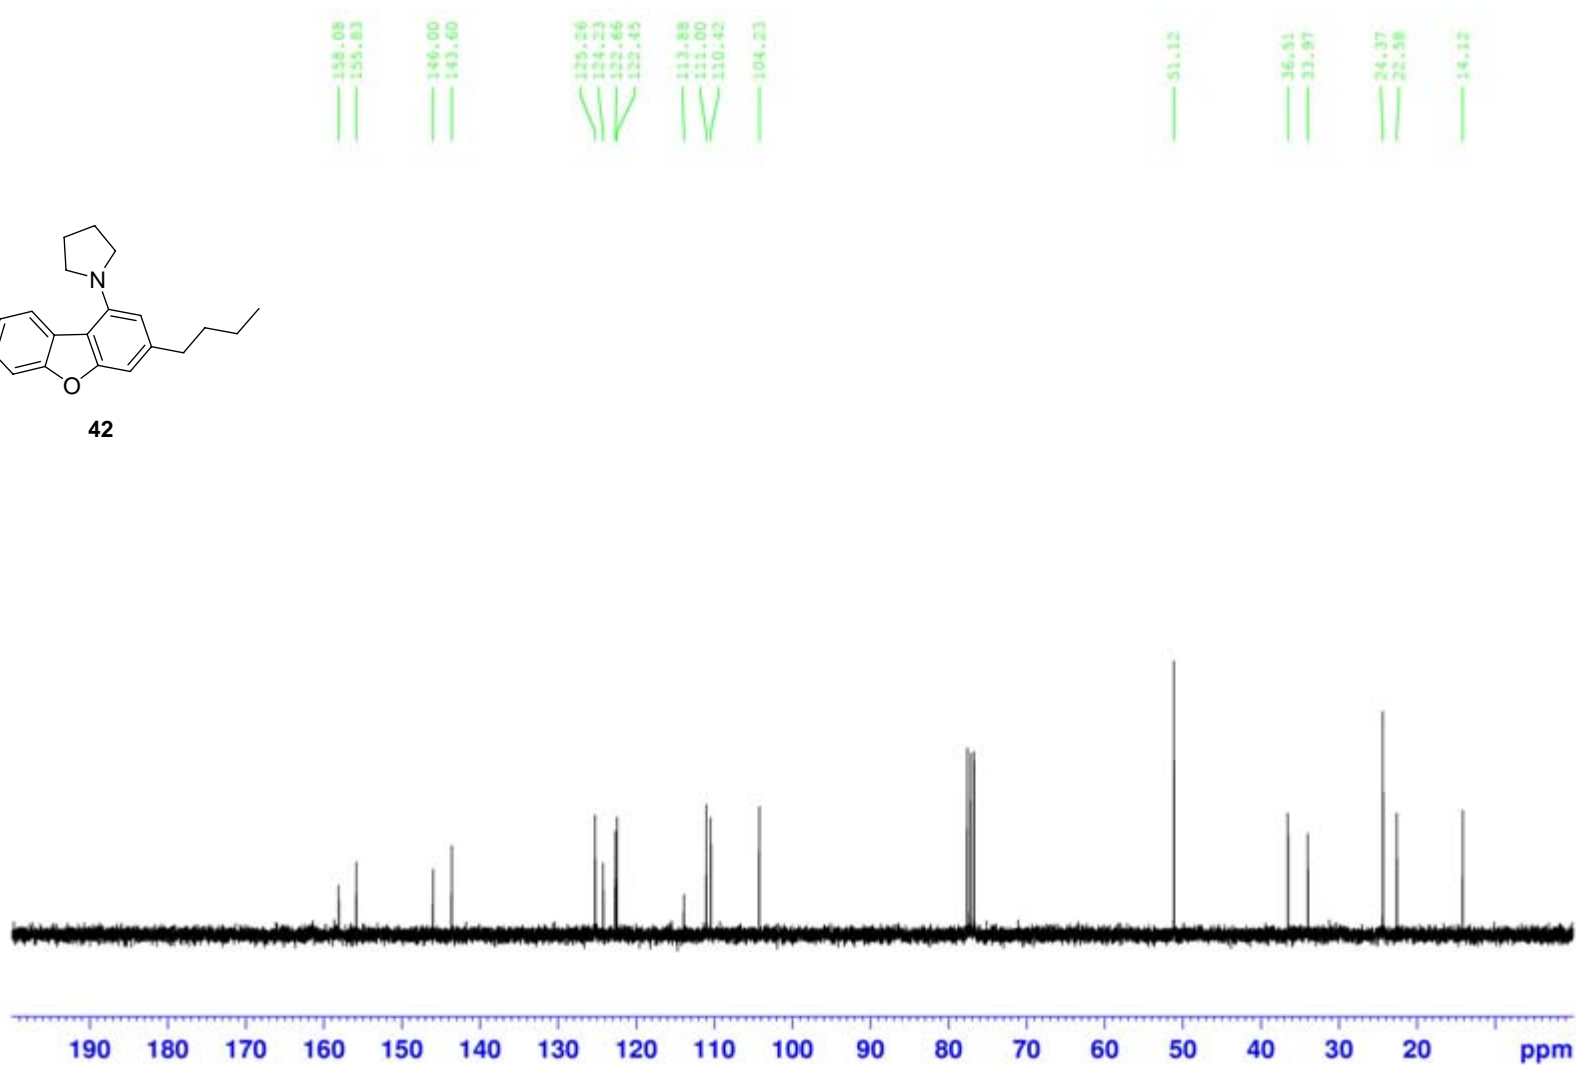

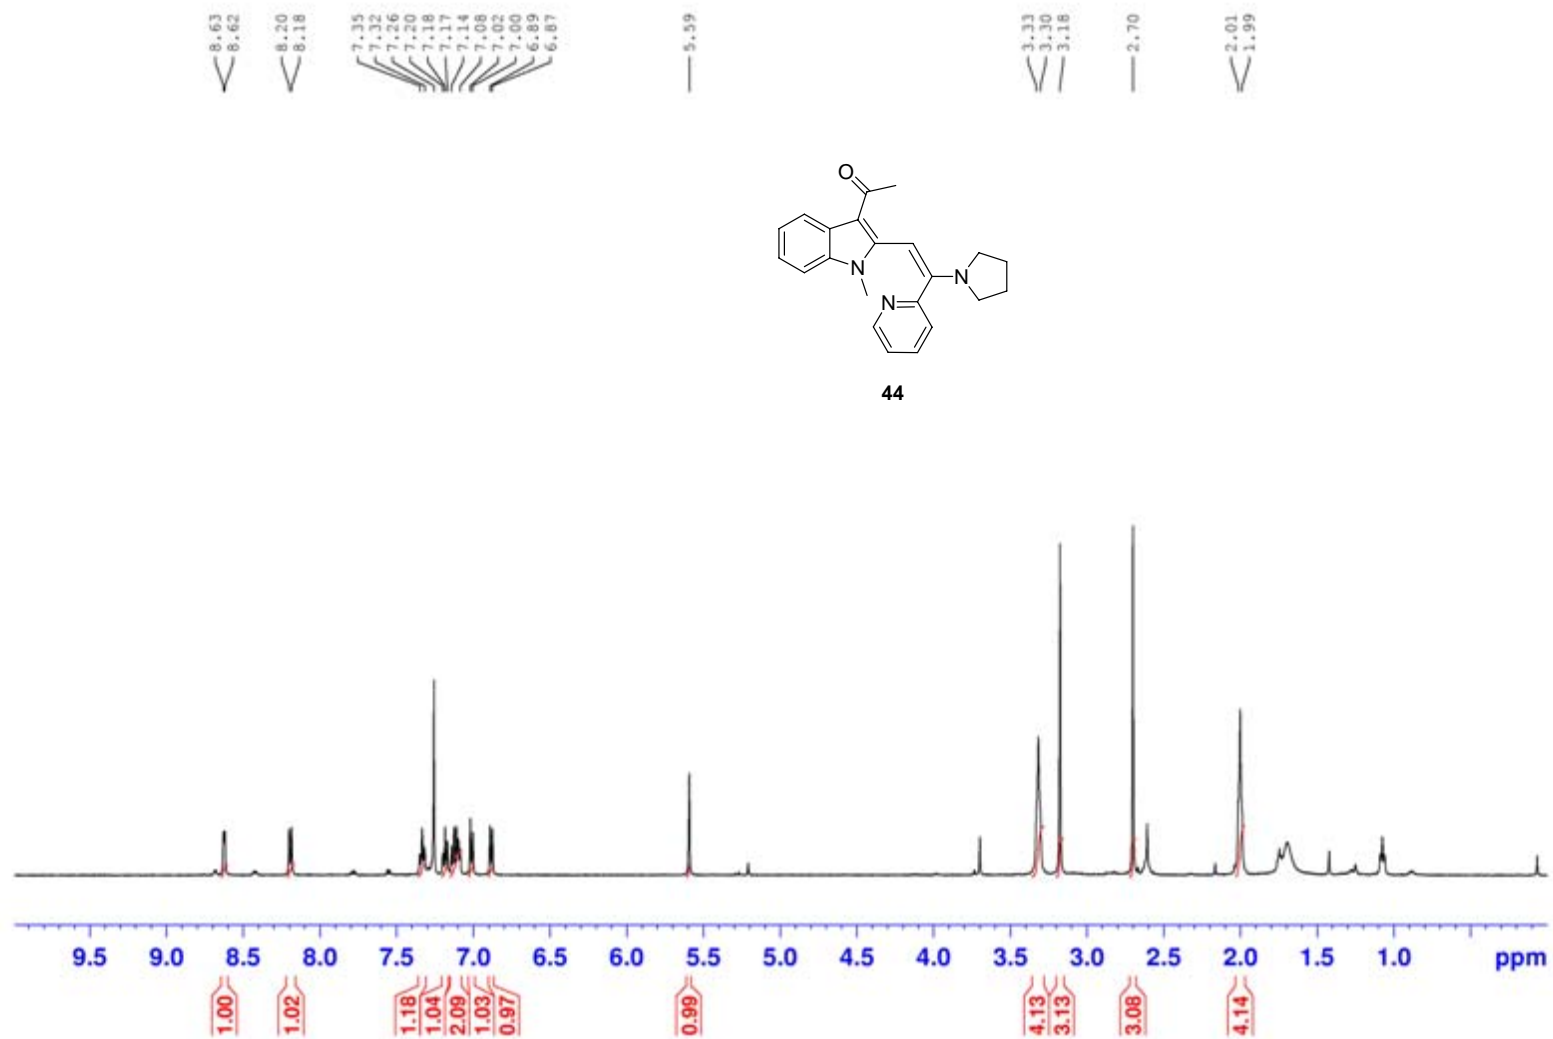

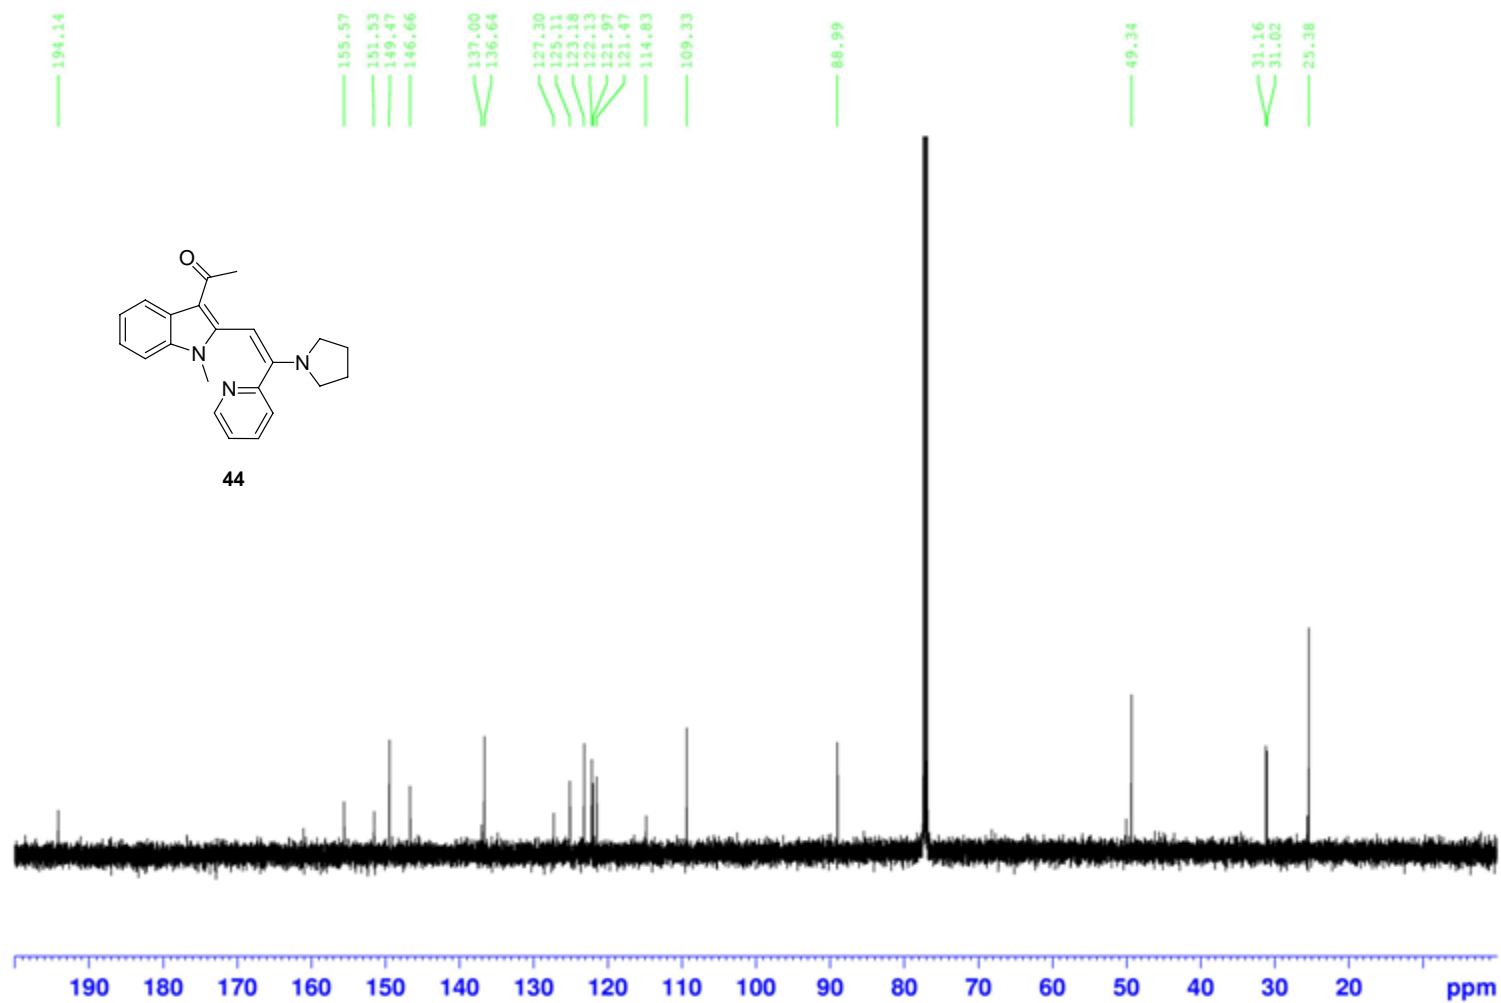

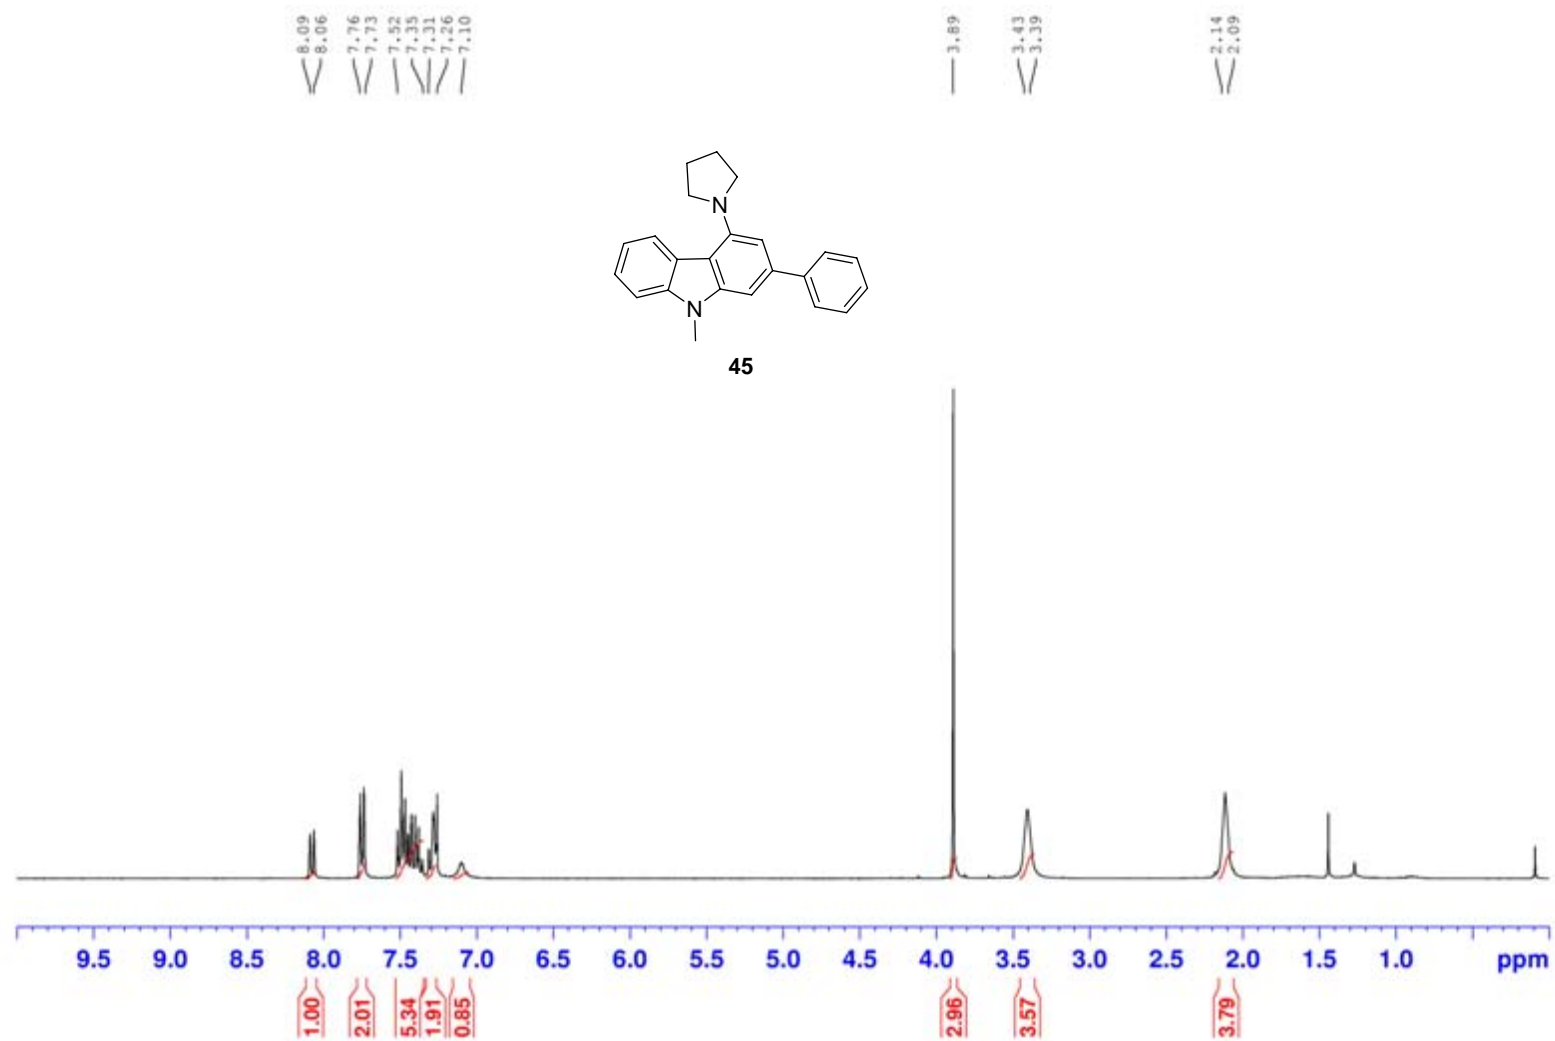

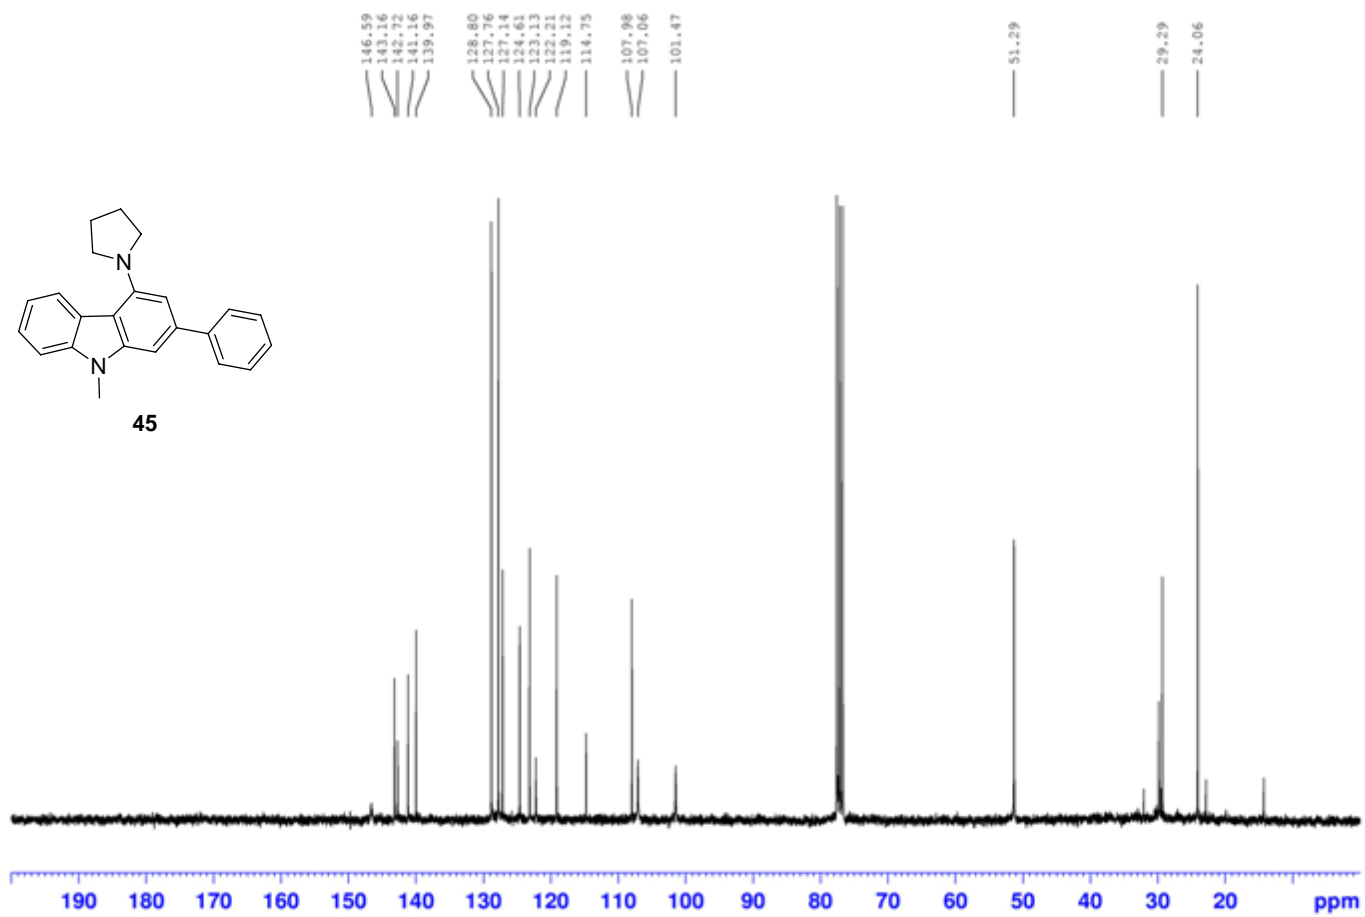



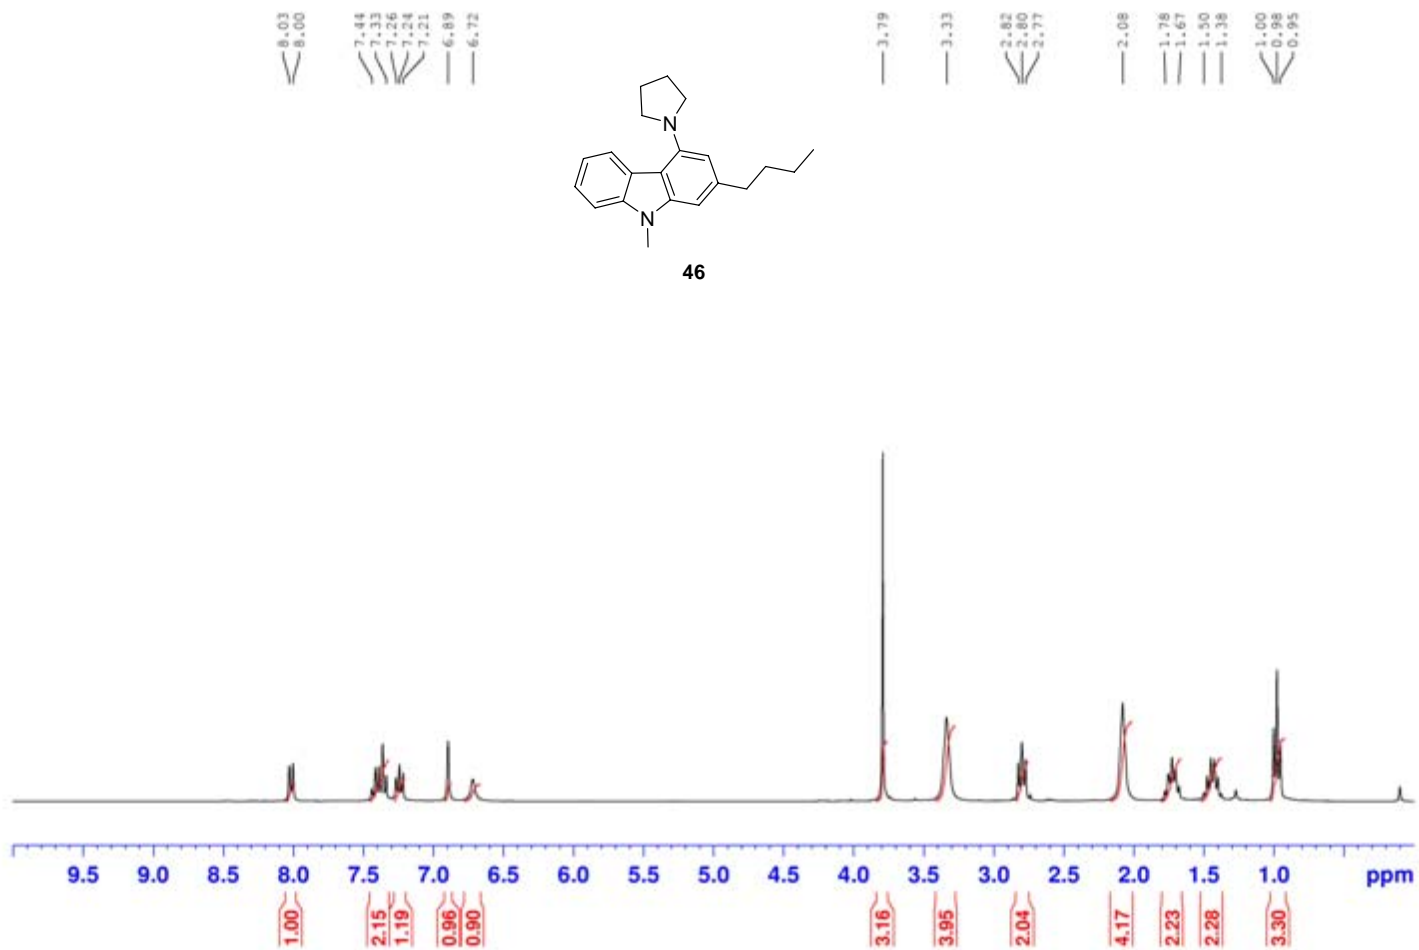

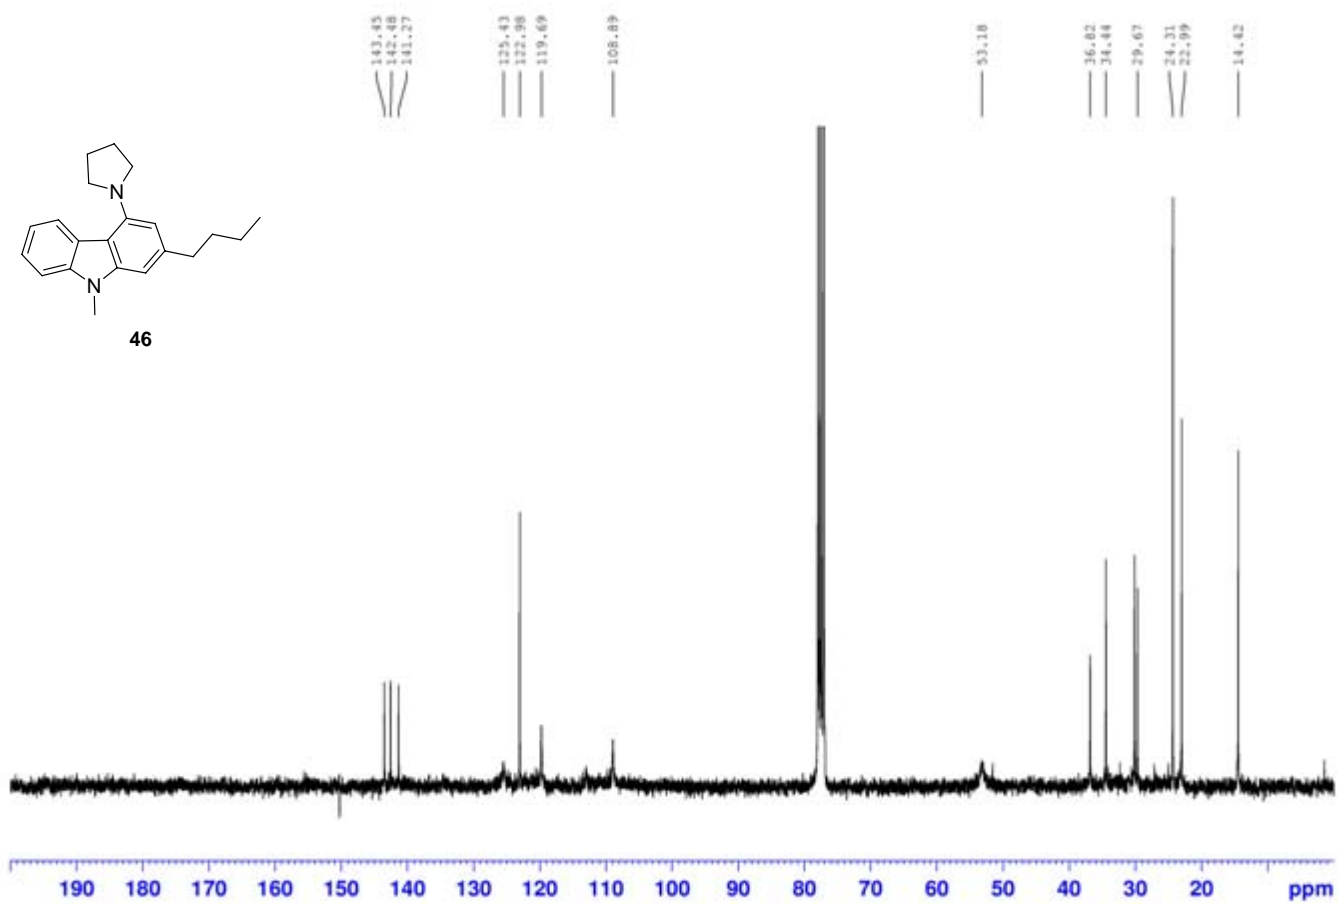

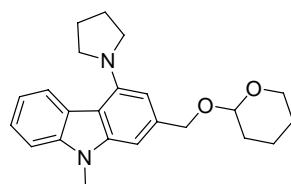

47

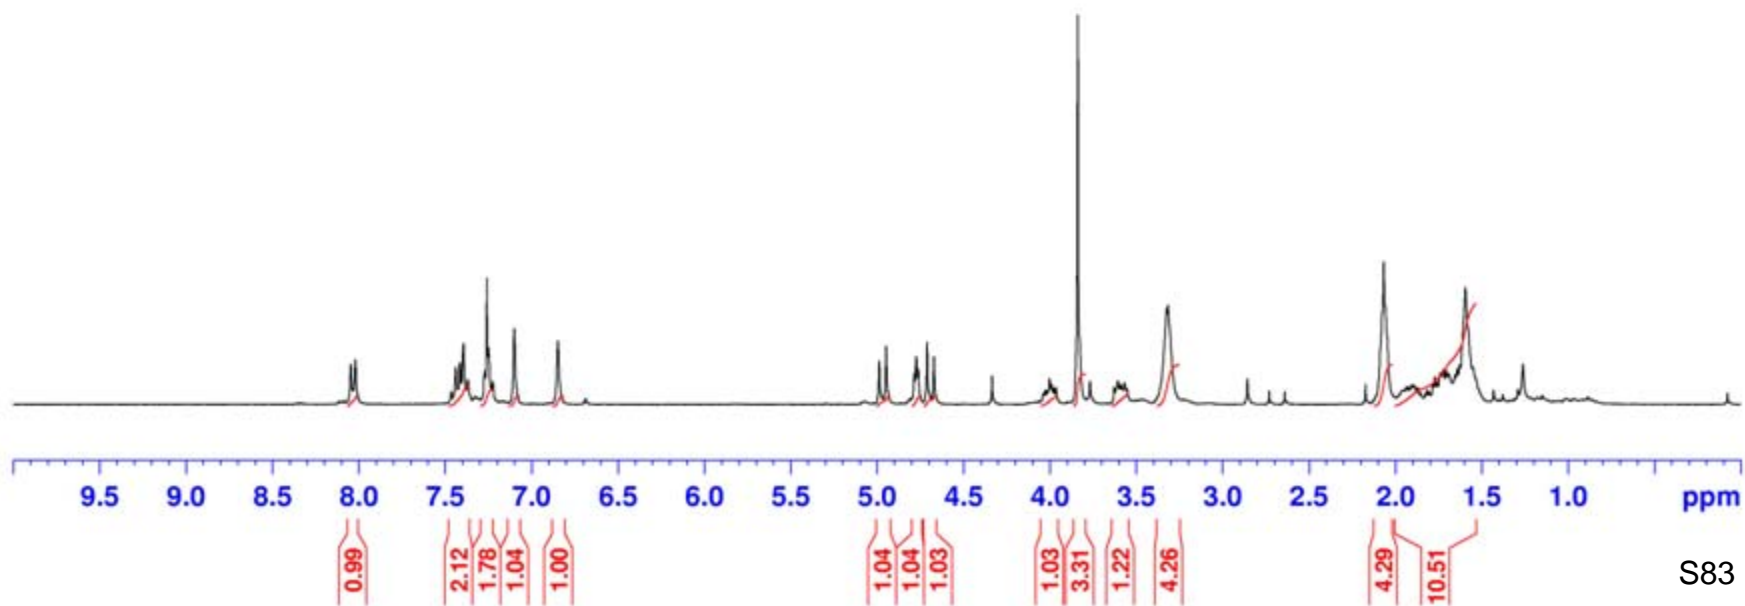

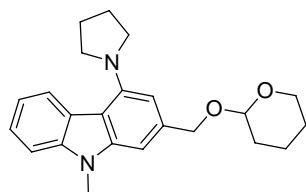

47

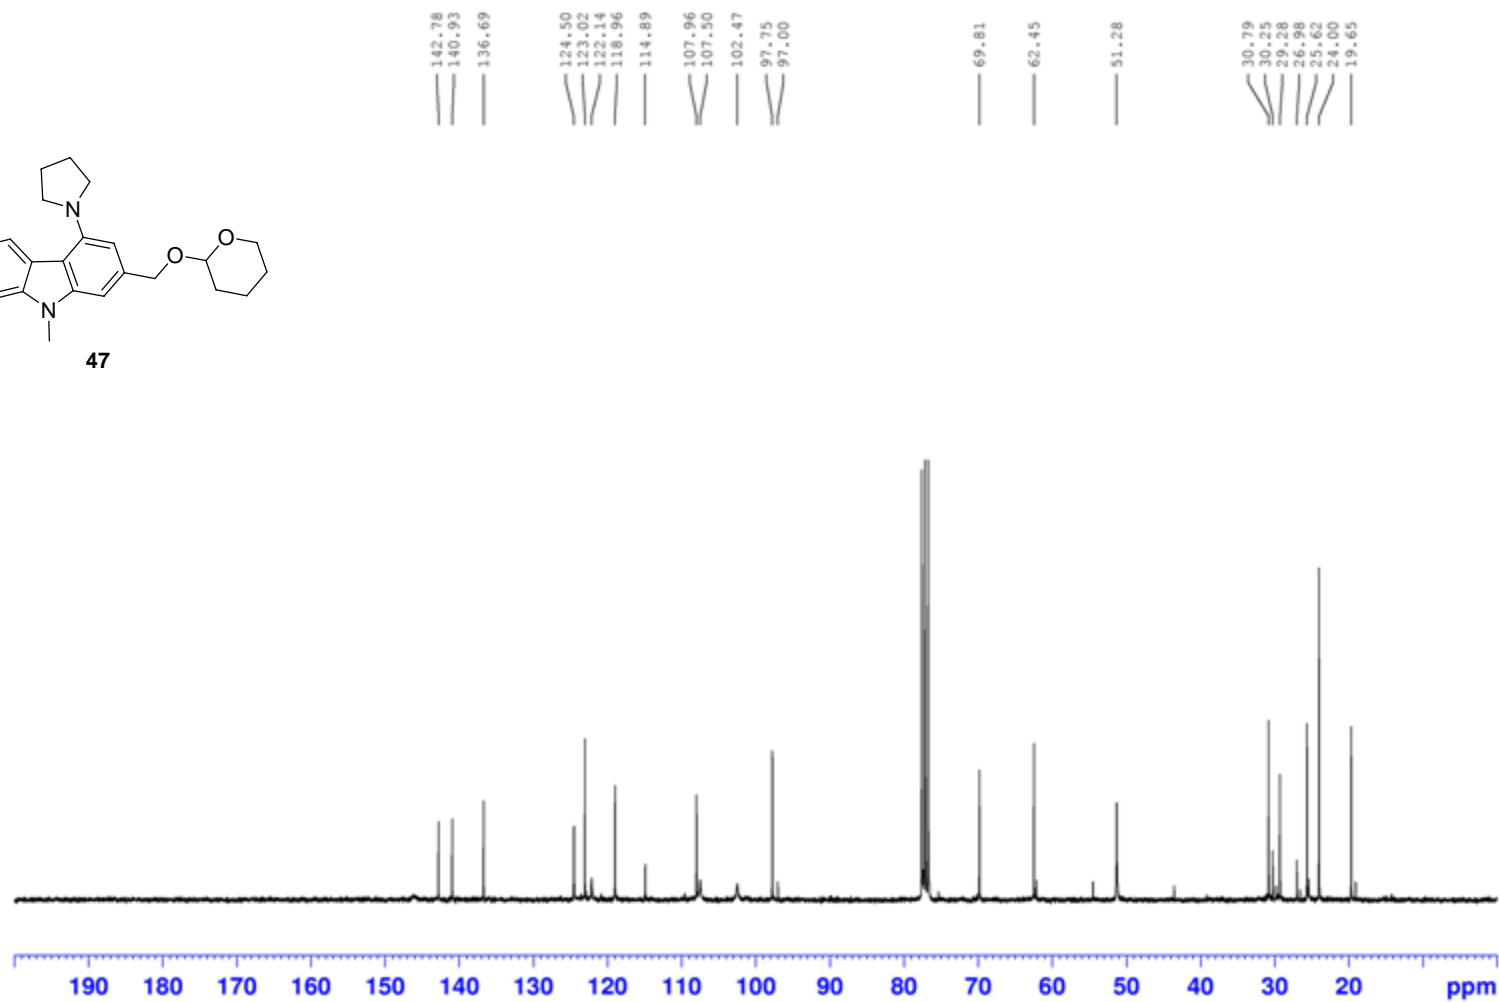

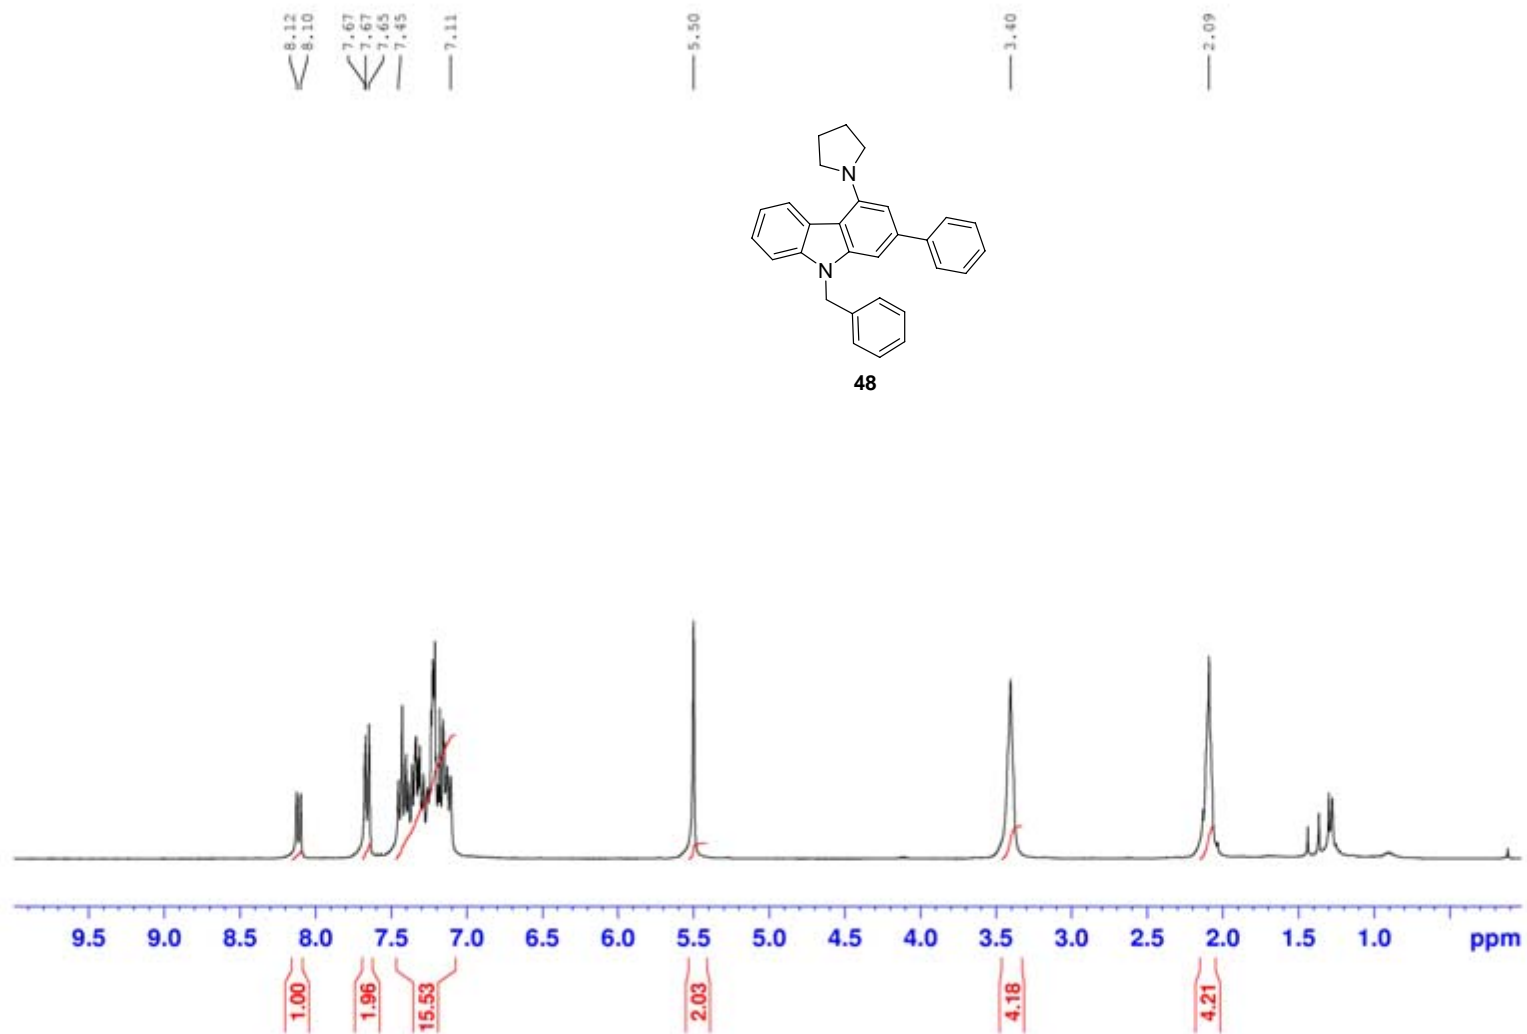

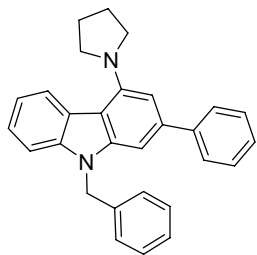

48

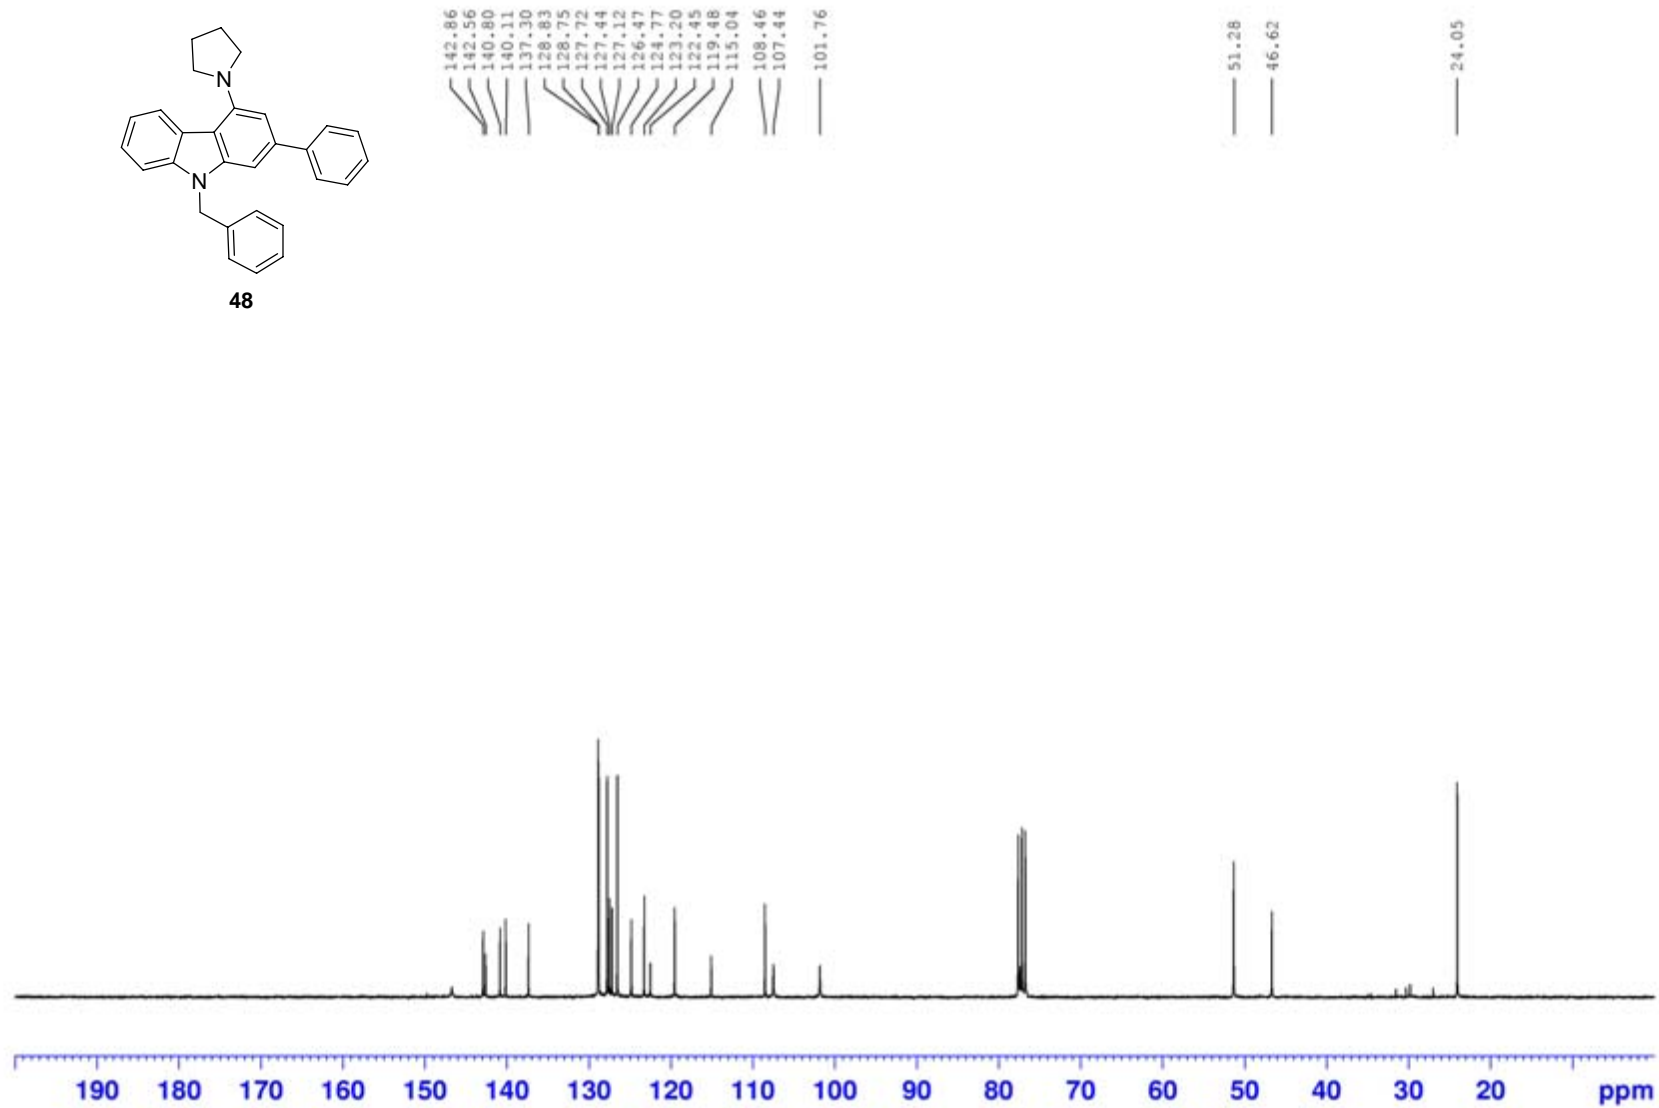

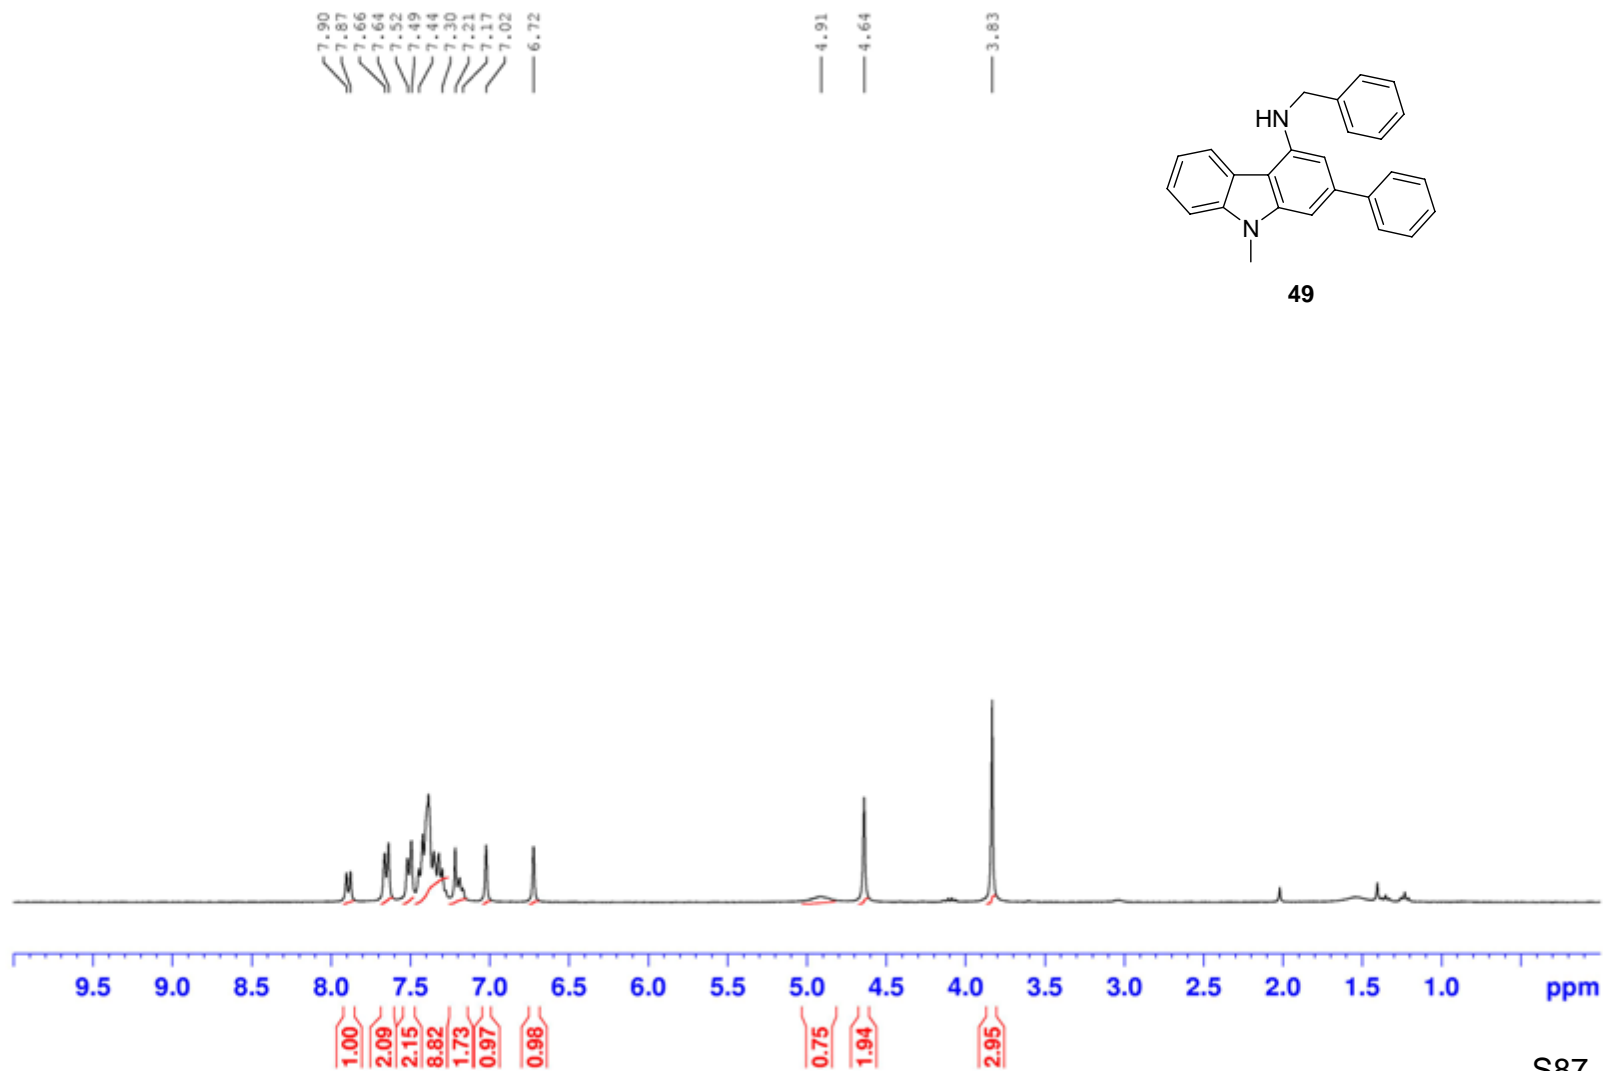

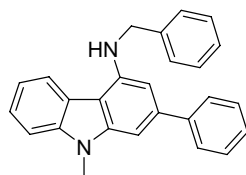

49

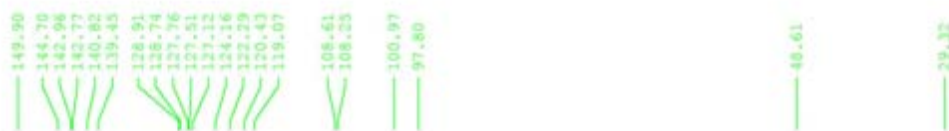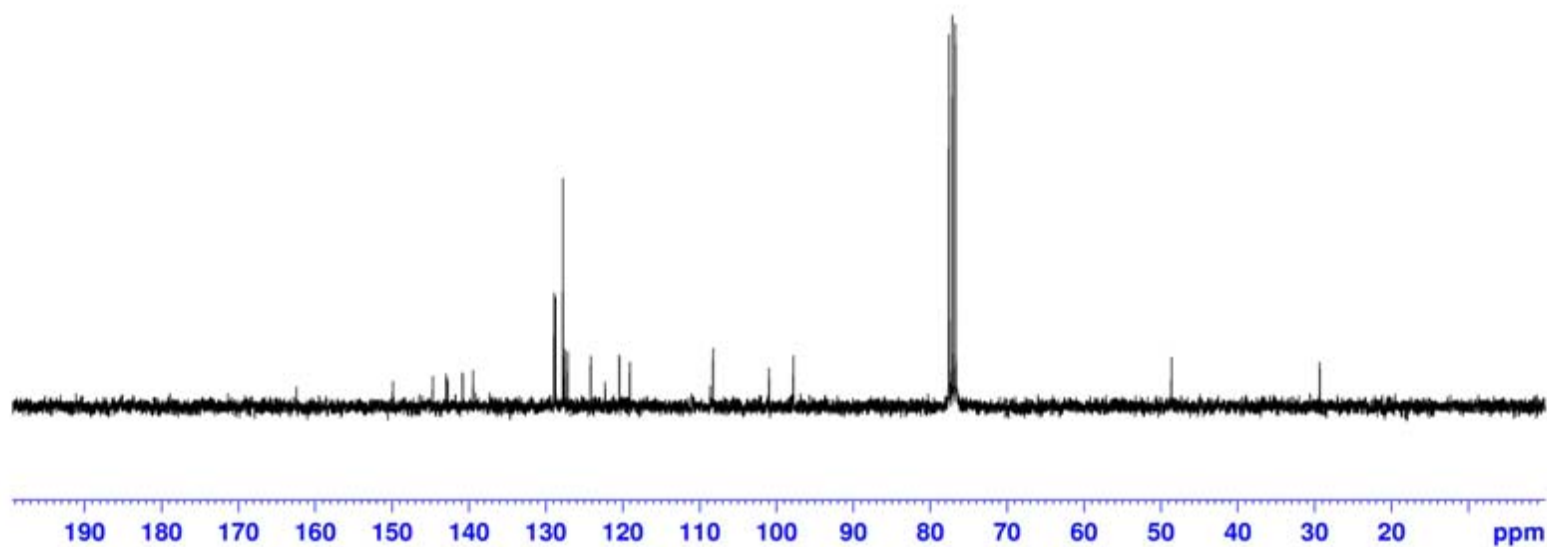



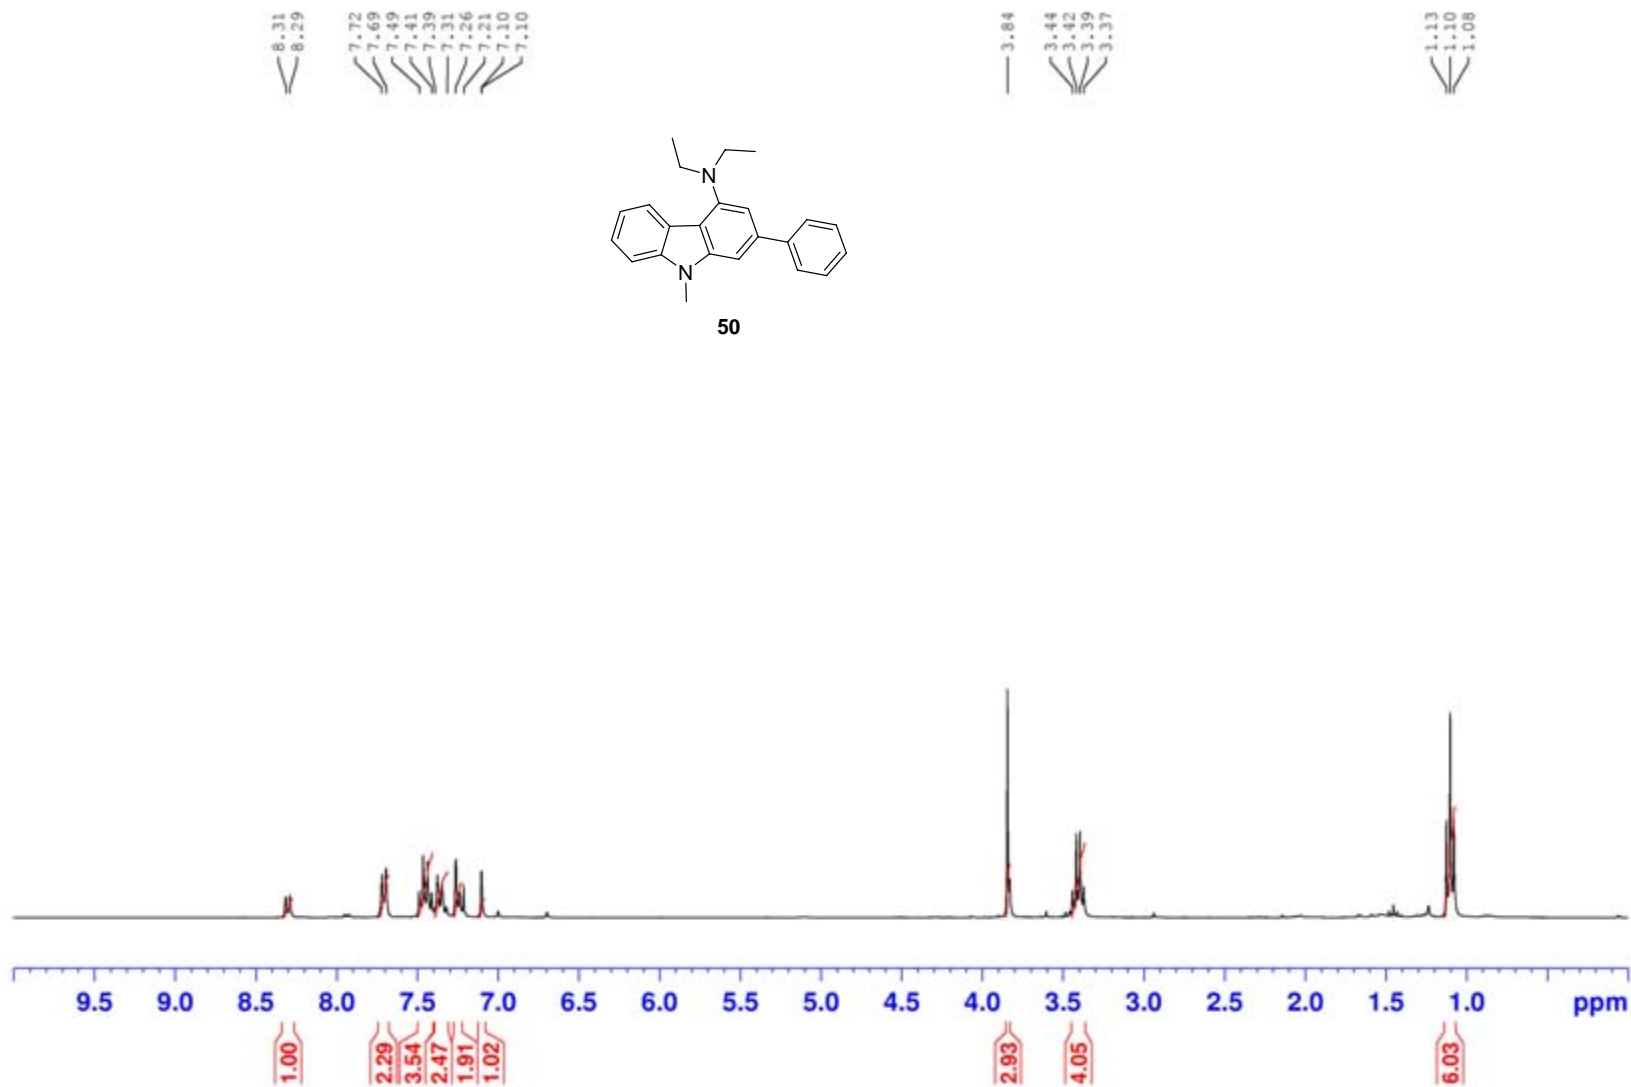

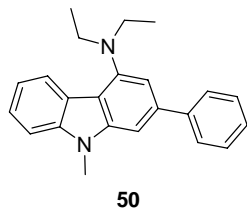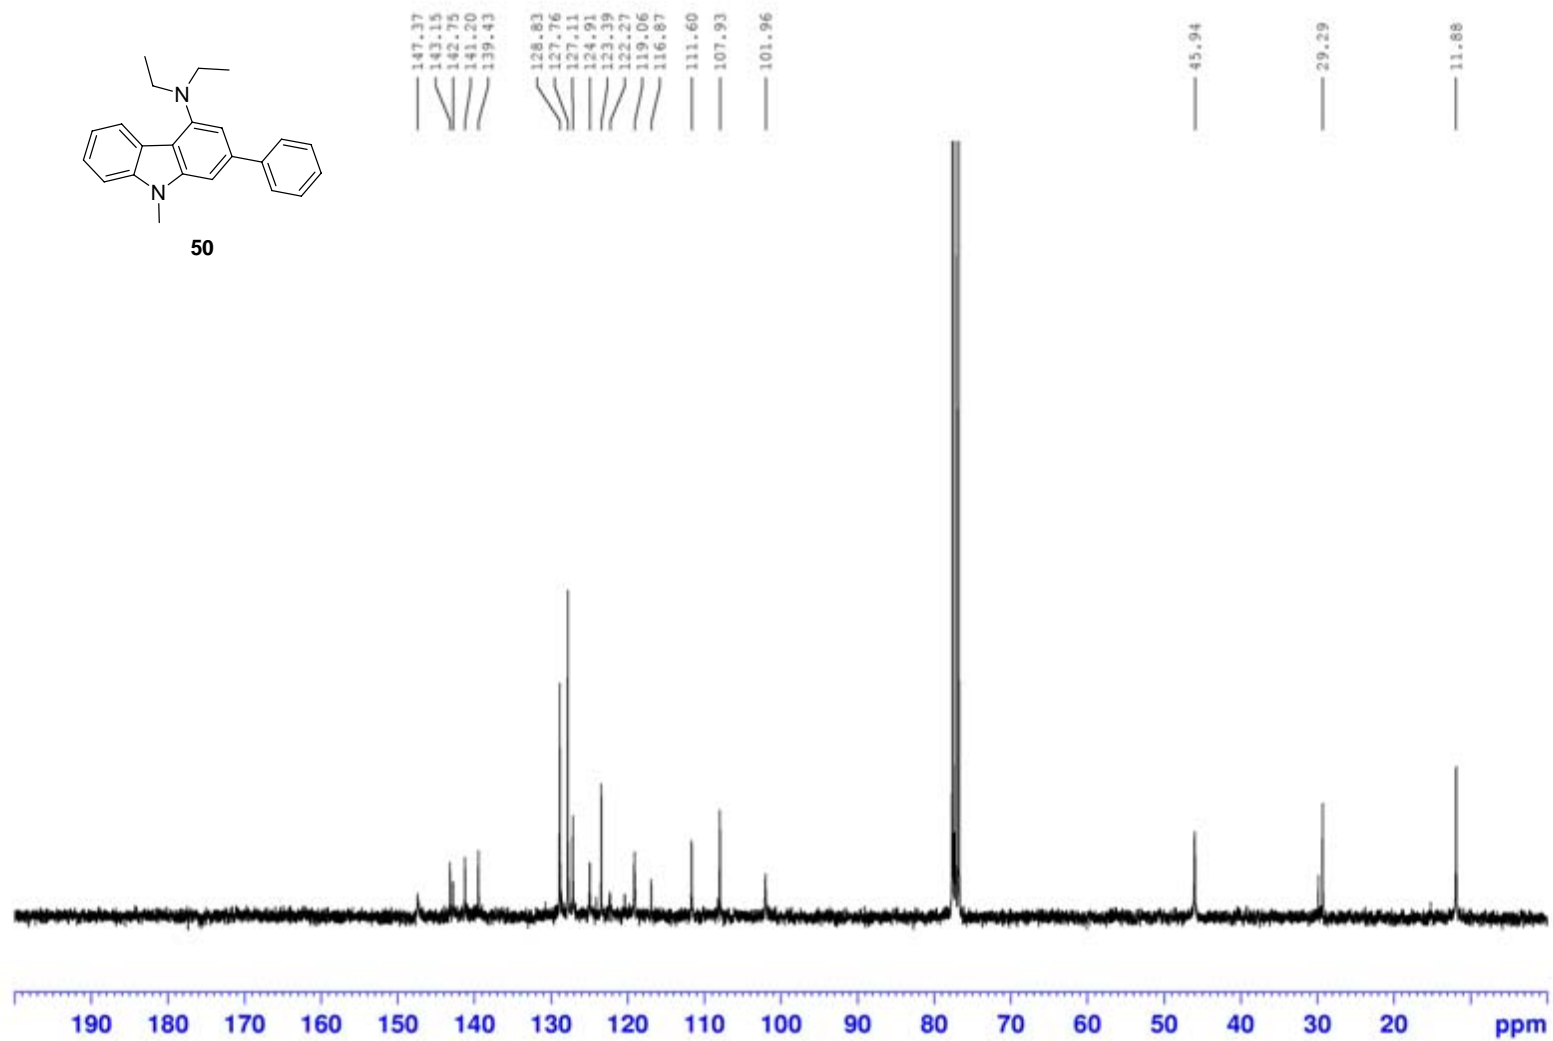

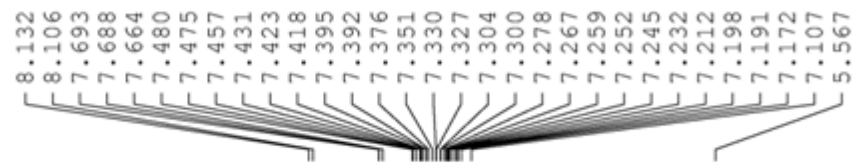

— 3.423

— 2.124

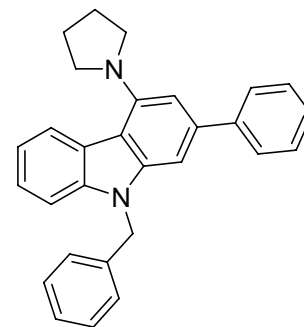

**48 bis**

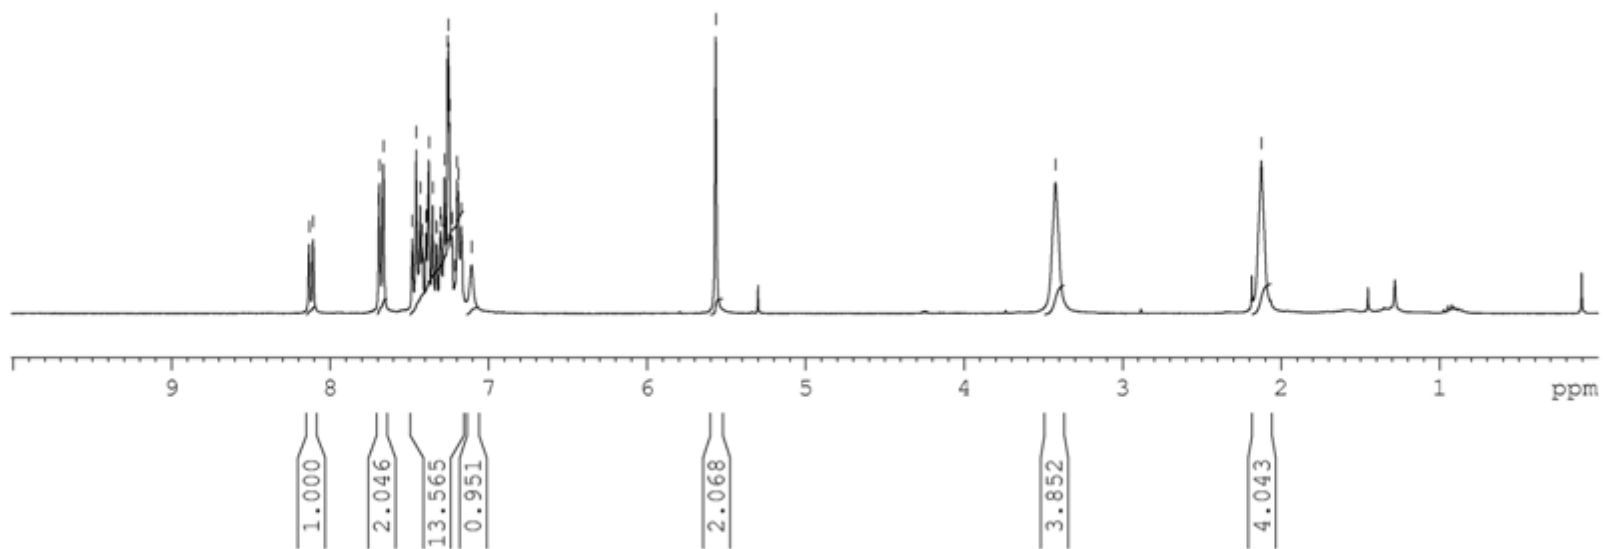

Supplement: Supplementary file 1 [file 4633624]
